# Supplementary material for: Iron-catalyzed oxidative biaryl cross-couplings via mixed diaryl titanates: significant influence of the order of combining aryl Grignard reagents with titanate
Source: Royal Society of Chemistry journal article supplement (doi:10.1039/c5cc00514k), 2015-01-01
Supplement: c5cc00514k1.pdf [file c5cc00514k1.pdf]

## Supporting information

# Iron-catalyzed oxidative biaryl cross-couplings via mixed diaryl titanates: significant influence of the order of combining aryl Grignard reagents with titanate

Kun-Ming Liu, Juan Wei and Xin-Fang Duan\*

College of Chemistry, Beijing Normal University, Beijing, 100875, China

### Table of contents

|                                                                                          |     |
|------------------------------------------------------------------------------------------|-----|
| 1. Specific data for the results in Fig. 1 and 2                                         | S2  |
| 2. Reaction optimization for oxidative cross-coupling                                    | S3  |
| 3. General experimental details                                                          | S4  |
| 4. General procedure for the additions of the mixed diaryl titanates to PhCHO            | S4  |
| 5. Typical procedure for iron-catalyzed oxidative couplings of the mixed diaryl titanate | S5  |
| 6. Characterization data for products                                                    | S6  |
| 7. References                                                                            | S12 |
| 8. <sup>1</sup> H and <sup>13</sup> C NMR spectra for products                           | S14 |

## 1. Specific data for the results in Fig. 1 and 2

Table S1 Comparison of the additions of the mixed diaryl titanates  $\text{Ar}[\text{Ar}'\text{Ti}(\text{OR})_3]\text{MgX}$  and  $\text{Ar}'[\text{ArTi}(\text{OR})_3]\text{MgX}$  to PhCHO

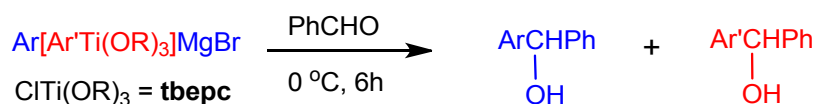

|     | $\text{Ar}[\text{Ar}'\text{Ti}(\text{OR})_3]\text{MgBr}$                                 | Yield(%)                                                       |                                                                        |
|-----|------------------------------------------------------------------------------------------|----------------------------------------------------------------|------------------------------------------------------------------------|
|     |                                                                                          | $\begin{array}{c} \text{ArCHPh} \\   \\ \text{OH} \end{array}$ | $\begin{array}{c} \text{Ar}'\text{CHPh} \\   \\ \text{OH} \end{array}$ |
| 3ba | $4\text{-MeOC}_6\text{H}_4[4\text{-MeC}_6\text{H}_4\text{Ti}(\text{OR})_3]\text{MgBr}$   | 74                                                             | 20                                                                     |
| 3ab | $4\text{-MeC}_6\text{H}_4[4\text{-MeOC}_6\text{H}_4\text{Ti}(\text{OR})_3]\text{MgBr}$   | 26                                                             | 57                                                                     |
| 3ca | $4\text{-MeOC}_6\text{H}_4[4\text{-EtOOC}_6\text{H}_4\text{Ti}(\text{OR})_3]\text{MgBr}$ | 74                                                             | 8                                                                      |
| 3ac | $4\text{-EtOOC}_6\text{H}_4[4\text{-MeOC}_6\text{H}_4\text{Ti}(\text{OR})_3]\text{MgBr}$ | 58                                                             | 37                                                                     |
| 3ed | $4\text{-FC}_6\text{H}_4[4\text{-MeNHCOC}_6\text{H}_4\text{Ti}(\text{OR})_3]\text{MgBr}$ | 88                                                             | 5                                                                      |
| 3de | $4\text{-MeNHCOC}_6\text{H}_4[4\text{-FC}_6\text{H}_4\text{Ti}(\text{OR})_3]\text{MgBr}$ | 37                                                             | 32                                                                     |

Table S2 Comparison of the iron-catalyzed oxidative couplings of the mixed diaryl titanates  $\text{Ar}[\text{Ar}'\text{Ti}(\text{OR})_3]\text{MgX}$  and  $\text{Ar}'[\text{ArTi}(\text{OR})_3]\text{MgX}$

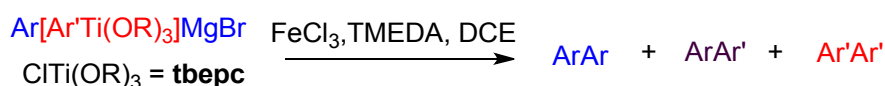

|     | $\text{Ar}[\text{Ar}'\text{Ti}(\text{OR})_3]\text{MgBr}$                                 | Yield(%) |       |        |
|-----|------------------------------------------------------------------------------------------|----------|-------|--------|
|     |                                                                                          | ArAr     | ArAr' | Ar'Ar' |
| 3ba | $4\text{-MeOC}_6\text{H}_4[4\text{-MeC}_6\text{H}_4\text{Ti}(\text{OR})_3]\text{MgBr}$   | 34       | 55    | 11     |
| 3ab | $4\text{-MeC}_6\text{H}_4[4\text{-MeOC}_6\text{H}_4\text{Ti}(\text{OR})_3]\text{MgBr}$   | 10       | 79    | 11     |
| 3ca | $4\text{-MeOC}_6\text{H}_4[4\text{-EtOOC}_6\text{H}_4\text{Ti}(\text{OR})_3]\text{MgBr}$ | 57       | 27    | 9      |
| 3ac | $4\text{-EtOOC}_6\text{H}_4[4\text{-MeOC}_6\text{H}_4\text{Ti}(\text{OR})_3]\text{MgBr}$ | 15       | 74    | 10     |
| 3ed | $4\text{-FC}_6\text{H}_4[4\text{-MeNHCOC}_6\text{H}_4\text{Ti}(\text{OR})_3]\text{MgBr}$ | 42       | 44    | 11     |
| 3de | $4\text{-MeNHCOC}_6\text{H}_4[4\text{-FC}_6\text{H}_4\text{Ti}(\text{OR})_3]\text{MgBr}$ | 13       | 84    | 3      |

## 2. Reaction optimization studies

2.1 Table S3. Reaction optimization for oxidative cross-coupling.<sup>a</sup>

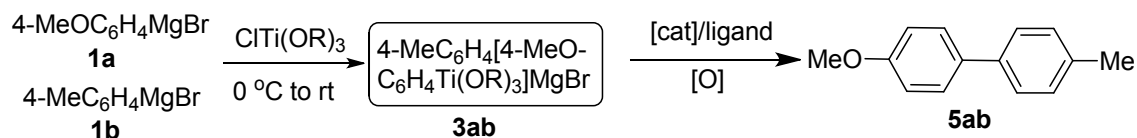

| entry | [cat]/ligand <sup>b</sup>               | titanate                | [O]                         | Time (h) | Yield (%) <sup>c</sup> |
|-------|-----------------------------------------|-------------------------|-----------------------------|----------|------------------------|
| 1     | PdCl <sub>2</sub> /dppp                 | ClTi(OiPr) <sub>3</sub> | O <sub>2</sub>              | 24       | –                      |
| 2     | NiCl <sub>2</sub> /dppp                 | ClTi(OiPr) <sub>3</sub> | DCE                         | 24       | 18                     |
| 3     | FeCl <sub>3</sub> /PBU <sub>3</sub>     | ClTi(OiPr) <sub>3</sub> | DCE                         | 6        | 47                     |
| 4     | FeCl <sub>3</sub> /PCy <sub>3</sub>     | ClTi(OiPr) <sub>3</sub> | DCE                         | 6        | 40                     |
| 5     | FeCl <sub>3</sub> /dppp                 | ClTi(OiPr) <sub>3</sub> | DCE                         | 6        | 51                     |
| 6     | FeCl <sub>3</sub> /dmadpp               | ClTi(OiPr) <sub>3</sub> | DCE                         | 10       | 42                     |
| 7     | FeCl <sub>3</sub> /NHC ligand           | ClTi(OiPr) <sub>3</sub> | DCE                         | 10       | 52                     |
| 8     | FeCl <sub>3</sub> /2,2'-biPy            | ClTi(OiPr) <sub>3</sub> | DCE                         | 12       | 45                     |
| 9     | FeCl <sub>3</sub> /tmeda                | ClTi(OiPr) <sub>3</sub> | DCE                         | 8        | 68                     |
| 10    | FeCl <sub>3</sub> /tmeda                | ClTi(OEt) <sub>3</sub>  | DCE                         | 8        | 64                     |
| 11    | FeCl <sub>3</sub> /tmeda                | tmpc                    | DCE                         | 10       | 64                     |
| 12    | FeCl <sub>3</sub> /tmeda                | tbepc                   | DCE                         | 10       | 74                     |
| 13    | Fe(acac) <sub>3</sub> /tmeda            | tbepc                   | DCE                         | 18       | 68                     |
| 14    | FeCl <sub>3</sub> /tmeda <sup>d</sup>   | tbepc                   | DCE                         | 10       | 78                     |
| 15    | FeCl <sub>3</sub> /tmeda <sup>d</sup>   | tbepc                   | Dry air <sup>e</sup>        | 24       | 66                     |
| 16    | FeCl <sub>3</sub> /tmeda <sup>d</sup>   | tbepc                   | O <sub>2</sub> <sup>e</sup> | 12       | 79                     |
| 17    | FeCl <sub>3</sub> /tmeda <sup>d,f</sup> | tbepc                   | O <sub>2</sub> <sup>e</sup> | 12       | 76                     |
| 18    | FeCl <sub>3</sub> /tmeda <sup>d,g</sup> | tbepc                   | O <sub>2</sub> <sup>e</sup> | 6        | 64                     |

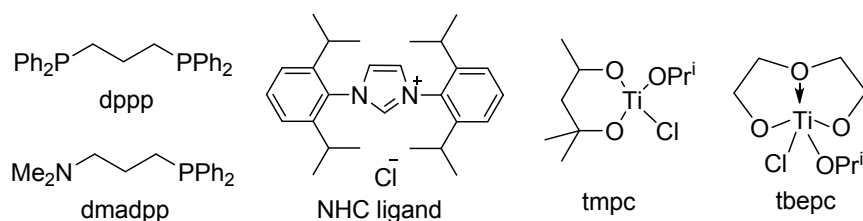

<sup>a</sup>The reaction was carried out on a 1 mmol scale at 0 °C. <sup>b</sup>Unless indicated otherwise, the catalyst metals were charged in 10 mol % with 20 mol % (monodentate), 10 mol % (bidentate) ligand or 30 mol % TMEDA. <sup>c</sup>Isolated yield. <sup>d</sup>8 mol% FeCl<sub>3</sub> / 20 mol% TMEDA. <sup>e</sup>1 atm. <sup>f</sup>Using THF/NMP (10:1) as a solvent. <sup>g</sup>the reaction was carried at room temperature.

## 2.2 Discussion

As seen in Table S3, the Pd or Ni-catalyzed reactions gave rather low or no yields of cross-coupling products (entries 1 and 2), indicating a significant synergetic effect between iron and titanium. While the simple phosphine ligands ( $\text{PBU}_3$ ,  $\text{PCY}_3$ ); bidentate phosphine ligand (dppp); N-containing phosphine ligand (dmadpp), NHC ligand and 2,2'-bipy can all improve cross-coupling,  $\text{FeCl}_3/\text{TMEDA}$  proved to be the most effective catalyst system, which promotes the oxidative cross-coupling reactions with yields up to 68% (entries 3–9). Also, we examined the influence of different titanates (entries 9–12). The cross-coupling occurred in a highly selective way (78% yield) by using easy preparation and handling of solid tbepe (entry 12).  $\text{Fe}(\text{acac})_3$  could also promote the cross coupling almost equally well, yet with prolonged reaction time (entry 13). Lowering the loading of the catalyst to 8 mol%  $\text{FeCl}_3/20$  mol% TMEDA did not affect the yield (entry 14). Bearing in mind that atmospheric oxygen or oxygen is indeed the greenest candidate oxidant, we tried to use atmospheric oxygen or oxygen as an oxidant in this reaction (entries 15 and 16). It was observed that while dry air could give an acceptable yield (66%) with a prolonged reaction time, the reaction using oxygen could proceed as well as those using DCE. We also explored the influence of solvent and temperature. The results showed that using THF/NMP instead of THF as a solvent did not improve the yield (entry 17). Raising the reaction temperature shortened the reaction time, yet the yield of cross-coupling product was reduced (entry 18).

## 3. General experimental details

All NMR spectra were collected using 400 MHz (100 MHz for  $^{13}\text{C}$  spectroscopy) and all spectra recorded with tetramethylsilane as an internal standard unless otherwise noted. ESI mass spectra were recorded on TRACE MS spectrometer. High resolution mass spectra (HRMS) were obtained with a Bruker microTOF (ESI). Infrared data were acquired using an AVATAR 360 FT-IR spectrophotometer. Elemental analysis was carried out with an Elementar Vario instrument. Melting points were recorded on a TECH X-4 microscopic instrument and uncorrected.

## 4. General procedure for the additions of the mixed diaryl titanates to PhCHO

### 4.1 General remarks for the preparation of aryl Grignard reagents

All reagents and solvents used for aryl magnesium reagents and reactions were freshly dehydrated before use. The corresponding glassware was oven dried (120 °C) and cooled under a stream of argon gas.

Aryl Grignard reagents such as phenyl magnesium or 4-methoxyphenyl magnesium were prepared

according to standard procedure. Functionalized aryl Grignard reagents such as 2-cyanophenyl magnesium chloride or 4-(ethoxycarbonyl)phenyl magnesium chloride were prepared via iodine - magnesium exchange using *i*-PrMgCl·LiCl according to Knochel's method.<sup>[1]</sup> All the Grignard reagents were titrated before use.<sup>[2]</sup>

#### **4.2 Typical procedure for General procedure for the additions of the mixed diaryl titanate (3ac) to PhCHO.**

Under Ar atmosphere, a solution of 4-MeOC<sub>6</sub>H<sub>4</sub>MgBr (2.5 mmol, 1.0 M in THF) was added dropwise to a solution of **tbepc** (615 mg, 2.5 mmol) in 10 mL THF at 0 °C and stirred for 2h at that temperature. To this mixture was added dropwise 4-(ethoxycarbonyl)phenyl magnesium chloride (2.5 mmol, 1.0 M in THF). The resulting mixture stirred at 0 °C for 0.5–1h. PhCHO (2.5 mmol, 265 mg) was added into the mixture at 0 °C and reacted at this temperature for 6 h (monitored by TLC). The reaction was quenched with saturated aqueous NH<sub>4</sub>Cl and extracted with ethyl acetate. The organic layer was dried over Na<sub>2</sub>SO<sub>4</sub> and concentrated to yield the crude compound, which was purified by column chromatography to yield the desired product **7a** (315 mg, yield 58%) and **8c** (237 mg, 37%).

#### **5. Typical procedure for iron-catalyzed oxidative couplings of the mixed diaryl titanate (Table 1, entry 9)**

Under Ar atmosphere, a solution of PhMgBr (2.5 mmol, 1.0 M in THF) was added dropwise to a solution of **tbepc** (615 mg, 2.5 mmol) in 10 mL THF at 0 °C and stirred for 2 h at that temperature. To this mixture was added dropwise 2-cyanophenyl magnesium chloride (2.5 mmol, 1.0 M in THF). The resulting mixture stirred at 0 °C for 0.5–1h. The solution of FeCl<sub>3</sub> (32.5 mg, 0.2 mmol), TMEDA (58 mg, 0.5 mmol) in THF (5 ml) was added in at one portion. The Ar atmosphere was changed into O<sub>2</sub> atmosphere (applied by an oxygen bag). The thus-obtained mixture was stirred at 0 °C until the completion of the reaction (monitored by TLC) (Note). The reaction was quenched with saturated aqueous Na<sub>2</sub>CO<sub>3</sub> and diluted with CH<sub>2</sub>Cl<sub>2</sub>. After being filtered, the mixture was extracted with CH<sub>2</sub>Cl<sub>2</sub>. The organic layer was dried over Na<sub>2</sub>SO<sub>4</sub> and concentrated to yield the crude compound, which was purified by column chromatography to yield the desired product **5lm** (350 mg, 78% yield).

Note: The reactions of Aryl Grignard reagents bearing amide groups (Table 1, entries 10-13) were carried out at 10–15 °C.

## 6. Characterization data for products

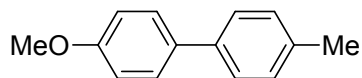

### 4-Methoxy-4'-methyl-1,1'-biphenyl(5ab)

The product was purified by column chromatography on silica gel with hexane to obtain a whitish solid (391 mg, 79% yield), m.p. = 180.3–181.5 °C (lit. 181–182 °C<sup>[3]</sup>). IR (cm<sup>-1</sup>, KBr): 3030, 2965, 1608, 1300, 1270, 1214, 1180, 1011; <sup>1</sup>H NMR (CDCl<sub>3</sub>, 400 MHz) δ (ppm) 7.52–7.44 (m, 4H), 7.25–7.21 (m, 2H), 6.97–6.94 (m, 2H), 3.84 (s, 3H), 2.38 (s, 3H); <sup>13</sup>C NMR (CDCl<sub>3</sub>, 100 MHz) δ (ppm) 158.9, 138.0, 133.8, 129.4, 128.0, 127.7, 126.6, 114.2, 55.4, 21.1.

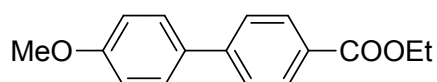

### Ethyl 4'-methoxy-[1,1'-biphenyl]-4-carboxylate(5ac)<sup>[4]</sup>

The product was purified by column chromatography on silica gel with hexane to obtain a whitish solid (473 mg, 74% yield), m.p. = 103.6–104.4 °C. (lit. 105 °C). IR (cm<sup>-1</sup>, KBr): 2952, 1718, 1602, 1291, 1110, 770; <sup>1</sup>H NMR (CDCl<sub>3</sub>, 400 MHz) δ (ppm) 8.11 (d, *J* = 6.6 Hz, 2H), 7.64 (d, *J* = 6.6 Hz, 2H), 7.60 (d, *J* = 6.9 Hz, 2H), 7.02 (d, *J* = 6.9 Hz, 2H), 4.42 (q, *J* = 5.7 Hz, 2H), 3.89 (s, 3H), 1.44 (t, *J* = 5.7 Hz, 3H); <sup>13</sup>C NMR (CDCl<sub>3</sub>, 100 MHz) δ (ppm) 166.6, 159.8, 145.1, 132.5, 130.1, 128.6, 128.4, 126.4, 114.4, 60.9, 55.4, 14.4.

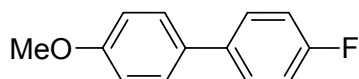

### 4-Fluoro-4'-methoxy-1,1'-biphenyl(5ad)<sup>[7]</sup>

The product was purified by column chromatography on silica gel with hexane to obtain a whitish solid (404 mg, 80% yield), m.p. = 87.6–88.4 °C. (lit. 87.3–87.8 °C). IR (cm<sup>-1</sup>, KBr): 1607, 1488, 1251, 833, 760, 690; <sup>1</sup>H NMR (CDCl<sub>3</sub>, 400 MHz) δ (ppm) 7.56–7.52 (m, 3H), 7.46 (d, *J* = 8.7 Hz, 1H), 7.41 (t, *J* = 7.5 Hz, 1H), 7.30 (d, *J* = 7.3 Hz, 1H), 6.97 (t, *J* = 8.8 Hz, 2H), 3.85 (s, 3H); <sup>13</sup>C NMR (CDCl<sub>3</sub>, 100 MHz) δ (ppm) 163.3, 160.9, 159.2, 137.0, 132.8, 128.3, 128.0, 126.7, 126.6, 115.6, 115.4, 114.3, 55.3.

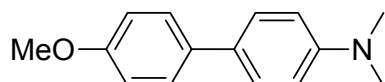

### 4'-Methoxy-N,N-dimethyl-[1,1'-biphenyl]-4-amine(5ag)<sup>[5]</sup>

The product was purified by column chromatography on silica gel with hexane to obtain a whitish

solid (448 mg, 79% yield), m.p. = 155.6–157.4 °C. (lit. 156–157 °C). IR (cm<sup>-1</sup>, KBr): 2897, 1612, 1507, 1248, 1177, 1040, 810; <sup>1</sup>H NMR (CDCl<sub>3</sub>, 400 MHz) δ (ppm) 7.46 (t, *J* = 9.6 Hz, 4H), 6.94 (d, *J* = 8.7 Hz, 2H), 6.80 (d, *J* = 8.6 Hz, 2H), 3.83 (s, 3H), 2.97 (s, 6H); <sup>13</sup>C NMR (CDCl<sub>3</sub>, 100 MHz) δ (ppm) 158.3, 149.6, 134.0, 129.3, 127.4, 127.3, 114.2, 113.1, 55.4, 40.7.

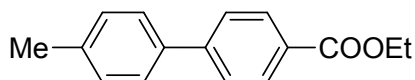

**Ethyl 4'-methyl-[1,1'-biphenyl]-4-carboxylate(5bc)** [6]

The product was purified by column chromatography on silica gel with hexane to obtain a whitish solid (463 mg, 77% yield), m.p. = 74.3–75.4 °C. (lit. 76–77 °C). IR (cm<sup>-1</sup>, KBr): 2879, 1705, 1604, 1273, 1111, 770; <sup>1</sup>H NMR (CDCl<sub>3</sub>, 400 MHz) δ (ppm) 8.09 (d, *J* = 8.3 Hz, 2H), 7.64 (d, *J* = 8.4 Hz, 2H), 7.52 (d, *J* = 8.2 Hz, 2H), 7.27 (d, *J* = 8.0 Hz, 2H), 4.40 (q, *J* = 7.2 Hz, 2H), 2.40 (s, 3H), 1.42 (t, *J* = 7.2 Hz, 3H); <sup>13</sup>C NMR (CDCl<sub>3</sub>, 100 MHz) δ (ppm) 166.6, 145.5, 138.1, 137.2, 130.1, 129.7, 129.0, 127.1, 126.8, 60.9, 21.2, 14.4.

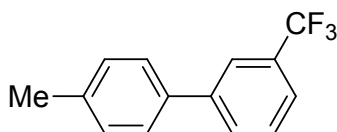

**4'-Methyl-3-(trifluoromethyl)-1,1'-biphenyl(5bf)** [3]

The product was purified by column chromatography on silica gel with hexane to obtain a colorless oil (496 mg, 84% yield). IR (cm<sup>-1</sup>, KBr): 2955, 1610, 1335, 1126, 798; <sup>1</sup>H NMR (CDCl<sub>3</sub>, 400 MHz) δ (ppm) 7.82 (s, 1H), 7.74 (d, *J* = 7.8 Hz, 1H), 7.59–7.48(m, 4H), 7.27 (d, *J* = 7.9 Hz, 2H), 2.41 (s, 3H); <sup>13</sup>C NMR (CDCl<sub>3</sub>, 100 MHz) δ (ppm) 141.9, 138.0, 131.3, 131.0, 130.2, 129.7, 129.2, 127.0, 124.7 (d), 124.0(d), 123.7(q), 21.1..

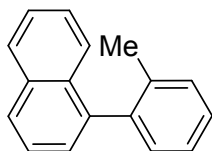

**1-(O-tolyl)naphthalene(5hi)** [7]

The product was purified by column chromatography on silica gel with hexane to obtain a whitish solid (392 mg, 72% yield), m.p. = 63.6–64.4 °C. (lit. 65–66°C [8]). IR (cm<sup>-1</sup>, KBr): 3049, 1590, 1504, 1485, 1392, 1122; <sup>1</sup>H NMR (CDCl<sub>3</sub>, 400 MHz) δ (ppm) 7.97–7.91 (m, 2H), 7.60–7.52 (m,

3H), 7.43–7.41 (m, 6H), 2.09 (s, 3H);  $^{13}\text{C}$  NMR ( $\text{CDCl}_3$ , 100 MHz)  $\delta$  (ppm) 140.3, 139.8, 136.9, 133.6, 132.1, 130.4, 129.9, 128.3, 127.6, 127.5, 126.7, 126.2, 126.0, 125.8, 125.6, 125.4, 20.1.

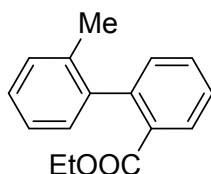

#### **Ethyl 2'-methyl-[1,1'-biphenyl]-2-carboxylate(5ij)** <sup>[9]</sup>

The product was purified by column chromatography on silica gel with hexane to obtain a colorless oil (456 mg, 76% yield). IR ( $\text{cm}^{-1}$ , KBr): 3018, 2926, 1722, 1603, 1458, 1379, 1047;  $^1\text{H}$  NMR ( $\text{CDCl}_3$ , 400 MHz)  $\delta$  (ppm) 7.70 (d,  $J = 7.9$  Hz, 1H), 7.46 (t,  $J = 7.4$  Hz, 1H), 7.20–7.17 (m, 5H), 6.73 (d,  $J = 7.2$  Hz, 1H), 3.80 (q,  $J = 7.2$  Hz, 2H), 2.38 (s, 3H), 0.92 (t,  $J = 7.2$  Hz, 3H);  $^{13}\text{C}$  NMR ( $\text{CDCl}_3$ , 100 MHz)  $\delta$  (ppm) 167.6, 141.6, 141.2, 135.8, 131.8, 131.3, 131.2, 129.2, 129.0, 127.7, 126.6, 126.5, 124.7, 62.1, 19.9, 14.2.

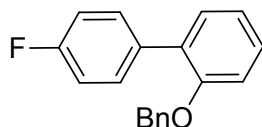

#### **2-(Benzyloxy)-4'-fluoro-1,1'-biphenyl(5dk)**

The product was purified by column chromatography on silica gel with EtOAc/petroleum ether (1:20) to obtain a whitish solid (465 mg, 67% yield), m.p. = 145.4–147.0°C. IR ( $\text{cm}^{-1}$ , KBr): 3044, 1604, 1587, 1450, 1276, 1110;  $^1\text{H}$  NMR ( $\text{CDCl}_3$ , 400 MHz)  $\delta$  (ppm) 7.55–7.51 (m, 2H), 7.34–7.26 (m, 7H), 7.10–7.01 (m, 4H), 5.07 (s, 2H);  $^{13}\text{C}$  NMR ( $\text{CDCl}_3$ , 100 MHz)  $\delta$  (ppm) 163.0, 161.1, 155.5, 137.1, 134.4 (d, 134.46, 134.44), 131.2 (d, 131.27, 131.21), 130.9, 130.4, 128.7, 128.5, 127.7, 126.9, 121.4, 114.9, 114.7, 113.4, 70.5. Anal. Calcd for  $\text{C}_{19}\text{H}_{15}\text{FO}$ : C, 81.99; H, 5.43; Found: C, 81.69; H, 5.14. MS (ESI):  $[\text{M}+\text{H}]^+$  ( $m/z$  279).

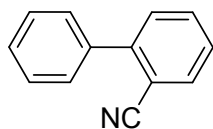

#### **[1,1'-Biphenyl]-2-carbonitrile(5lm)** <sup>[10]</sup>

The product was purified by column chromatography on silica gel with hexane to obtain a colorless oil (350 mg, 78% yield). IR ( $\text{cm}^{-1}$ , KBr): 3046, 2225, 1599, 1480, 760;  $^1\text{H}$  NMR ( $\text{CDCl}_3$ , 400 MHz)  $\delta$  (ppm) 7.79 (d,  $J = 6.2$  Hz, 1H), 7.67 (td,  $J = 6.2$  Hz, 0.8 Hz, 1H), 7.60 (d,  $J = 5.8$  Hz,



2H), 7.56–7.51 (m, 3H), 7.50–7.47 (m, 2H);  $^{13}\text{C}$  NMR ( $\text{CDCl}_3$ , 100 MHz)  $\delta$  (ppm) 145.5, 138.2, 133.8, 132.9, 130.1, 128.79, 128.77, 127.6, 127.2, 118.8, 111.3.

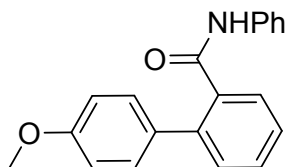

#### 4'-Methoxy-N-phenyl-[1,1'-biphenyl]-2-carboxamide(5an) <sup>[11]</sup>

The product was purified by column chromatography on silica gel with EtOAc/petroleum ether (1:5) to obtain a whitish solid (598 mg, 79% yield), m.p. = 144.2–144.8 °C. (lit. 143–144°C). IR ( $\text{cm}^{-1}$ , KBr): 3439, 3242, 1655, 1601, 1536, 1244, 757;  $^1\text{H}$  NMR ( $\text{CD}_3\text{SOCD}_3$ , 400 MHz)  $\delta$  (ppm) 10.26 (s, 1H), 7.59 (t,  $J$  = 6.1 Hz, 4H), 7.49 (t,  $J$  = 5.6 Hz, 2H), 7.43 (d,  $J$  = 7.0 Hz, 2H), 7.32 (t,  $J$  = 6.3 Hz, 2H), 7.09 (t,  $J$  = 5.9 Hz, 1H), 6.98 (d,  $J$  = 7.0 Hz, 2H), 3.78 (s, 3H);  $^{13}\text{C}$  NMR ( $\text{CD}_3\text{SOCD}_3$ , 100 MHz)  $\delta$  (ppm) 173.2, 163.9, 144.4, 144.0, 142.2, 137.5, 135.1, 134.9, 134.7, 133.8, 133.0, 131.9, 128.7, 124.9, 119.0, 60.3.

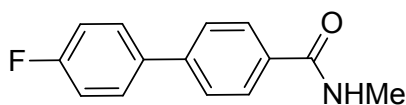

#### 4'-Fluoro-N-methyl-[1,1'-biphenyl]-4-carboxamide(5de)

The product was purified by column chromatography on silica gel with EtOAc/petroleum ether (1:5) to obtain a whitish solid (480 mg, 84% yield), m.p. = 188.2–189.6 °C. IR ( $\text{cm}^{-1}$ , KBr): 3295, 1633, 1552, 1495, 1231, 831;  $^1\text{H}$  NMR ( $\text{CDCl}_3$ , 400 MHz)  $\delta$  (ppm) 7.85 (d,  $J$  = 6.4 Hz, 2H), 7.62–7.57 (m, 4H), 7.16 (t,  $J$  = 6.8 Hz, 2H), 6.27 (br s, 1H), 3.06 (d,  $J$  = 2.7 Hz, 3H);  $^{13}\text{C}$  NMR ( $\text{CDCl}_3$ , 100 MHz)  $\delta$  (ppm) 167.8, 164.1, 161.6, 143.2, 136.2 (d, 136.19, 136.16), 133.3, 128.8 (d, 128.9, 128.8), 127.4–127.1 (d, 127.4, 127.1), 116.0–115.7 (d, 116.0, 115.7), 26.9. Anal. Calcd for  $\text{C}_{14}\text{H}_{12}\text{FNO}$ : C, 73.35; H, 5.28; N, 6.11; Found: C, 73.15; H, 5.44; N, 6.15. MS (ESI):  $[\text{M}+\text{H}]^+$  ( $m/z$  230).

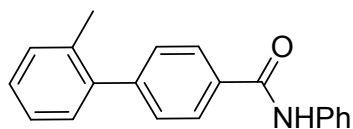

#### 2'-Methyl-N-phenyl-[1,1'-biphenyl]-4-carboxamide (5io)

The product was purified by column chromatography on silica gel with EtOAc/petroleum ether (1:5) to obtain a whitish solid (545 mg, 76% yield), m.p. = 189.8–190.6 °C. IR ( $\text{cm}^{-1}$ , KBr): 3352,

3035, 2939, 1654, 1572, 1390, 1265, 812;  $^1\text{H}$  NMR ( $\text{CDCl}_3$ , 400 MHz)  $\delta$  (ppm) 7.93 (d,  $J = 7.9$  Hz, 2H), 7.87 (br s, 1H), 7.67 (d,  $J = 8.1$  Hz, 2H), 7.45 (d,  $J = 8.0$  Hz, 2H), 7.39 (t,  $J = 7.8$  Hz, 2H), 7.30–7.22 (m, 4H), 7.17 (t,  $J = 7.5$  Hz, 1H), 2.28 (s, 3H);  $^{13}\text{C}$  NMR ( $\text{CDCl}_3$ , 100 MHz)  $\delta$  (ppm) 165.6, 145.8, 140.7, 138.0, 135.2, 133.4, 130.5, 129.7, 129.6, 129.2, 127.9, 126.9, 126.0, 124.6, 120.2, 20.4. Anal. Calcd for  $\text{C}_{20}\text{H}_{17}\text{NO}$ : C, 83.59; H, 5.96; N, 4.87; Found: C, 83.45; H, 5.94; N, 5.03. MS (ESI):  $[\text{M}+\text{H}]^+$  (m/z 288).

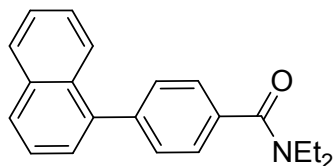

#### **N,N-diethyl-4-(naphthalen-1-yl)benzamide (5hp)**

The product was purified by column chromatography on silica gel with EtOAc/petroleum ether (1:5) to obtain a yellow solid (598 mg, 79% yield), m.p. = 92.4–94.2 °C. IR ( $\text{cm}^{-1}$ , KBr): 3057, 2972, 1634, 1427, 1286, 781;  $^1\text{H}$  NMR ( $\text{CDCl}_3$ , 400 MHz)  $\delta$  (ppm) 7.92–7.87 (m, 3H), 7.55–7.49 (m, 6H), 7.47–7.41 (m, 2H), 3.50 (b, 4H), 1.25 (b, 6H);  $^{13}\text{C}$  NMR ( $\text{CDCl}_3$ , 100 MHz)  $\delta$  (ppm) 171.2, 141.7, 139.5, 136.1, 133.8, 131.4, 130.1, 128.3, 128.0, 127.0, 126.4, 126.2, 125.9, 125.8, 125.4, 43.5, 39.4, 14.4, 13.1. Anal. Calcd for  $\text{C}_{21}\text{H}_{21}\text{NO}$ : C, 83.13; H, 6.98; N, 4.62; Found: C, 83.15; H, 6.54; N, 5.04. MS (ESI):  $[\text{M}+\text{H}]^+$  (m/z 304).

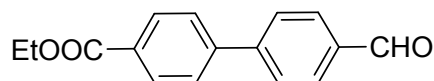

#### **Ethyl 4'-formyl-[1,1'-biphenyl]-4-carboxylate (5cq)**

The product was purified by column chromatography on silica gel with hexane to obtain a whitish solid (457 mg, 72% yield), m.p. = 62.6–64.4 °C. IR ( $\text{cm}^{-1}$ , KBr): 2936, 1702, 1606, 1276, 1187, 1104, 771;  $^1\text{H}$  NMR ( $\text{CDCl}_3$ , 400 MHz)  $\delta$  (ppm) 10.11 (s, 1H), 8.14 (d,  $J = 8.4$ , 3H), 7.92–7.88 (m, 2H), 7.71–7.68 (m, 2H), 7.65 (t,  $J = 7.7$  Hz, 1H), 4.42 (q,  $J = 7.2$ , 2H), 1.43 (t,  $J = 7.2$  Hz, 3H);  $^{13}\text{C}$  NMR ( $\text{CDCl}_3$ , 100 MHz)  $\delta$  (ppm) 192.0, 166.3, 143.9, 141.1, 137.1, 133.1, 130.3, 129.7, 128.2, 127.1, 61.1, 14.4.

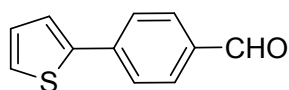

#### **4-(Thiophen-2-yl)benzaldehyde(5rq) <sup>[12]</sup>**

The product was purified by column chromatography on silica gel with hexane to obtain a whitish

solid (448 mg, 79% yield), m.p. = 69.1–69.4 °C. (lit. 69.0–69.5 °C). IR (cm<sup>-1</sup>, KBr): 3011, 1701, 1604, 1276, 792; <sup>1</sup>H NMR (CDCl<sub>3</sub>, 500 MHz) δ (ppm) 10.03 (s, 1H), 7.91 (d, *J* = 8.3, 2H), 7.79 (d, *J* = 8.2 Hz, 2H), 7.49 (dd, *J* = 3.6 Hz, 0.9 Hz, 1 H), 7.43–7.42 (m, 1H), 7.16 (dd, *J* = 5.0 Hz, 3.8 Hz, 1H); <sup>13</sup>C NMR (CDCl<sub>3</sub>, 125 MHz) δ (ppm) 191.5, 142.7, 140.1, 135.1, 130.5, 128.5, 127.0, 126.1, 125.1.

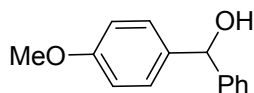

#### (4-Methoxyphenyl)(phenyl)methanol (7a) <sup>[13]</sup>

The product was purified by column chromatography on silica gel with EtOAc/petroleum ether (1:10) to obtain a whitish solid. m.p. = 93.5–94.5 °C (lit. 95 °C<sup>[14]</sup>). IR (cm<sup>-1</sup>, KBr): 3556, 1606, 1461, 1180, 1028, 845; <sup>1</sup>H NMR (CDCl<sub>3</sub>, 400 MHz) δ (ppm) 7.34–7.28 (m, 4H), 7.24 (d, *J* = 8.4 Hz, 3H), 6.83 (d, *J* = 8.8 Hz, 2H), 5.73 (s, 1H), 3.75 (s, 3H), 2.45 (br s, 1H); <sup>13</sup>C NMR (CDCl<sub>3</sub>, 100 MHz) δ (ppm) 159.1, 144.1, 136.3, 128.4, 128.0, 127.3, 126.5, 113.9, 75.8, 55.3.

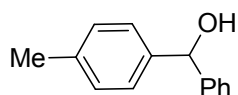

#### Phenyl(p-tolyl)methanol(8b) <sup>[15]</sup>

The product was purified by column chromatography on silica gel with EtOAc/petroleum ether (1:10) to obtain a whitish solid. m.p. = 53.5–54.5 °C (lit. 53.4–54.0 °C). IR (cm<sup>-1</sup>, KBr): 3373, 1559, 1472, 1380, 1171, 1020, 856, 779; <sup>1</sup>H NMR (CDCl<sub>3</sub>, 400 MHz) δ (ppm) 7.47 (d, *J* = 7.3 Hz, 1H), 7.29–7.26 (m, 4H), 7.24–7.15 (m, 3H), 7.10 (d, *J* = 7.2 Hz, 1H), 5.91 (s, 1H), 2.35 (br s, 1H), 2.20 (s, 3H); <sup>13</sup>C NMR (CDCl<sub>3</sub>, 100 MHz) δ (ppm) 138.2, 136.8, 130.7, 125.8, 123.8, 122.9, 122.8, 122.4, 121.6, 121.4, 68.6, 14.7.

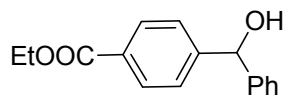

#### Ethyl 4-(hydroxy(phenyl)methyl)benzoate(8c)

The product was purified by column chromatography on silica gel with EtOAc/petroleum ether (1:10) to obtain a colorless oil. IR (cm<sup>-1</sup>, KBr): 3475, 3010, 1715, 1640, 1253, 1180, 1080, 787, 694; <sup>1</sup>H NMR (CDCl<sub>3</sub>, 400 MHz) δ (ppm) 7.98 (d, *J* = 8.4 Hz, 2H), 7.44 (d, *J* = 8.2 Hz, 2H), 7.35–7.26 (m, 5H), 5.85 (s, 1H), 4.34 (q, *J* = 7.2 Hz, 2H), 2.69 (br s, 1H), 1.37 (t, *J* = 7.2 Hz, 3H); <sup>13</sup>C NMR (CDCl<sub>3</sub>, 100 MHz) δ (ppm) 166.6, 148.7, 143.2, 129.8, 129.5, 128.7, 127.9, 126.7, 126.3, 75.9, 61.0, 14.3.

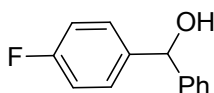

#### (4-Fluorophenyl)(phenyl)methanol(7d)<sup>[13]</sup>

The product was purified by column chromatography on silica gel with EtOAc/petroleum ether (1:10) to obtain colorless oil. IR (cm<sup>-1</sup>, KBr): 3330, 1601, 1487, 1173, 1100, 1012, 922, 823, 774; <sup>1</sup>H NMR (CDCl<sub>3</sub>, 400 MHz) δ (ppm) 7.30–7.19 (m, 7H), 6.95 (t, *J* = 8.7 Hz, 2H), 5.71 (s, 1H), 2.49 (br s, 1H); <sup>13</sup>C NMR (CDCl<sub>3</sub>, 100 MHz) δ (ppm) 158.4–156.5 (d), 138.9, 134.8 (d, 134.82, 134.80), 123.9, 123.5(d, 123.58, 123.51), 123.0, 121.8, 110.65–110.48(d), 70.9,

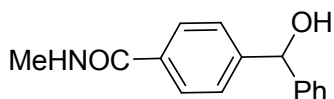

#### 4-(Hydroxy(phenyl)methyl)-N-methylbenzamide(8e)

The product was purified by column chromatography on silica gel with EtOAc/petroleum ether (1:2) to obtain a whitish solid, m.p. = 107.1–108.5 °C. IR (cm<sup>-1</sup>, KBr): 3450, 2956, 1641, 1552, 1400, 1325, 1296, 852 <sup>1</sup>H NMR (CDCl<sub>3</sub>, 400 MHz) δ (ppm) 7.59 (d, *J* = 8.2 Hz, 2H), 7.34–7.23 (m, 7H), 6.59 (d, *J* = 4.6 Hz, 1H), 5.78 (s, 1H), 3.85 (br s, 1H), 2.88 (d, *J* = 4.8 Hz, 3H); <sup>13</sup>C NMR (CDCl<sub>3</sub>, 100 MHz) δ (ppm) 168.3, 147.5, 143.6, 133.4, 128.5, 127.7, 127.0, 126.63, 126.56, 75.6, 26.8. Anal. Calcd for C<sub>15</sub>H<sub>15</sub>NO<sub>2</sub>: C, 74.67; H, 6.27; N, 5.81; Found: C, 74.59; H, 6.34; N, 5.82. MS (ESI): [M+H]<sup>+</sup> (m/z 242).

## 7.

## Reference.

- 
- [1] A. Krasovskiy, P. Knochel, *Angew. Chem. Int. Ed.*, **2004**, *43*, 3333.
- [2] A. Krasovskiy, P. Knochel, *Synthesis*, **2006**, *5*, 890.
- [3] L. Ackermann, A. Althammer, *Org. Lett.*, **2006**, *8*(16), 3457.
- [4] M. Amatore, C. Gosmini, *Angew. Chem. Int. Ed.* **2008**, *47*(11), 2089.
- [5] S. E. Denmark, R. C. Smith, W. T. Chang, J. M. Muhuhi, *J. Am. Chem. Soc.*, **2009**, *131*(8), 3104.
- [6] L. G. Xie, Z. X. Wang, *Chem. Eur. J.*, **2010**, *16*(34), 10332.
- [7] R. J. Madhushaw, J. Reniguntala, C-Y. Lo, C-W Hwang, M-D. Su, H-C. Shen, S. Pal, I. R. Shaikh, R-S. Liu, *J. Am. Chem. Soc.*, **2004**, *126*(47), 15560.
- [8] C. J. O'Brien, E. A. B. Kantchev, C. Valente, N. Hadei, C. Niloufar, G. A. Chass, A. Lough, A. C. Hopkinson, M. G. Organ, *Chem. Eur. J.*, **2006**, *12*(18), 4743.
- [9] P. Maël, L. Stephane, D. Georges, P. Cyril, M. Francis, L. Vincent, *Tetrahedron. Lett.*, **2005**, *46*, 8385.

## 8. $^1\text{H}$ and $^{13}\text{C}$ NMR spectra for products

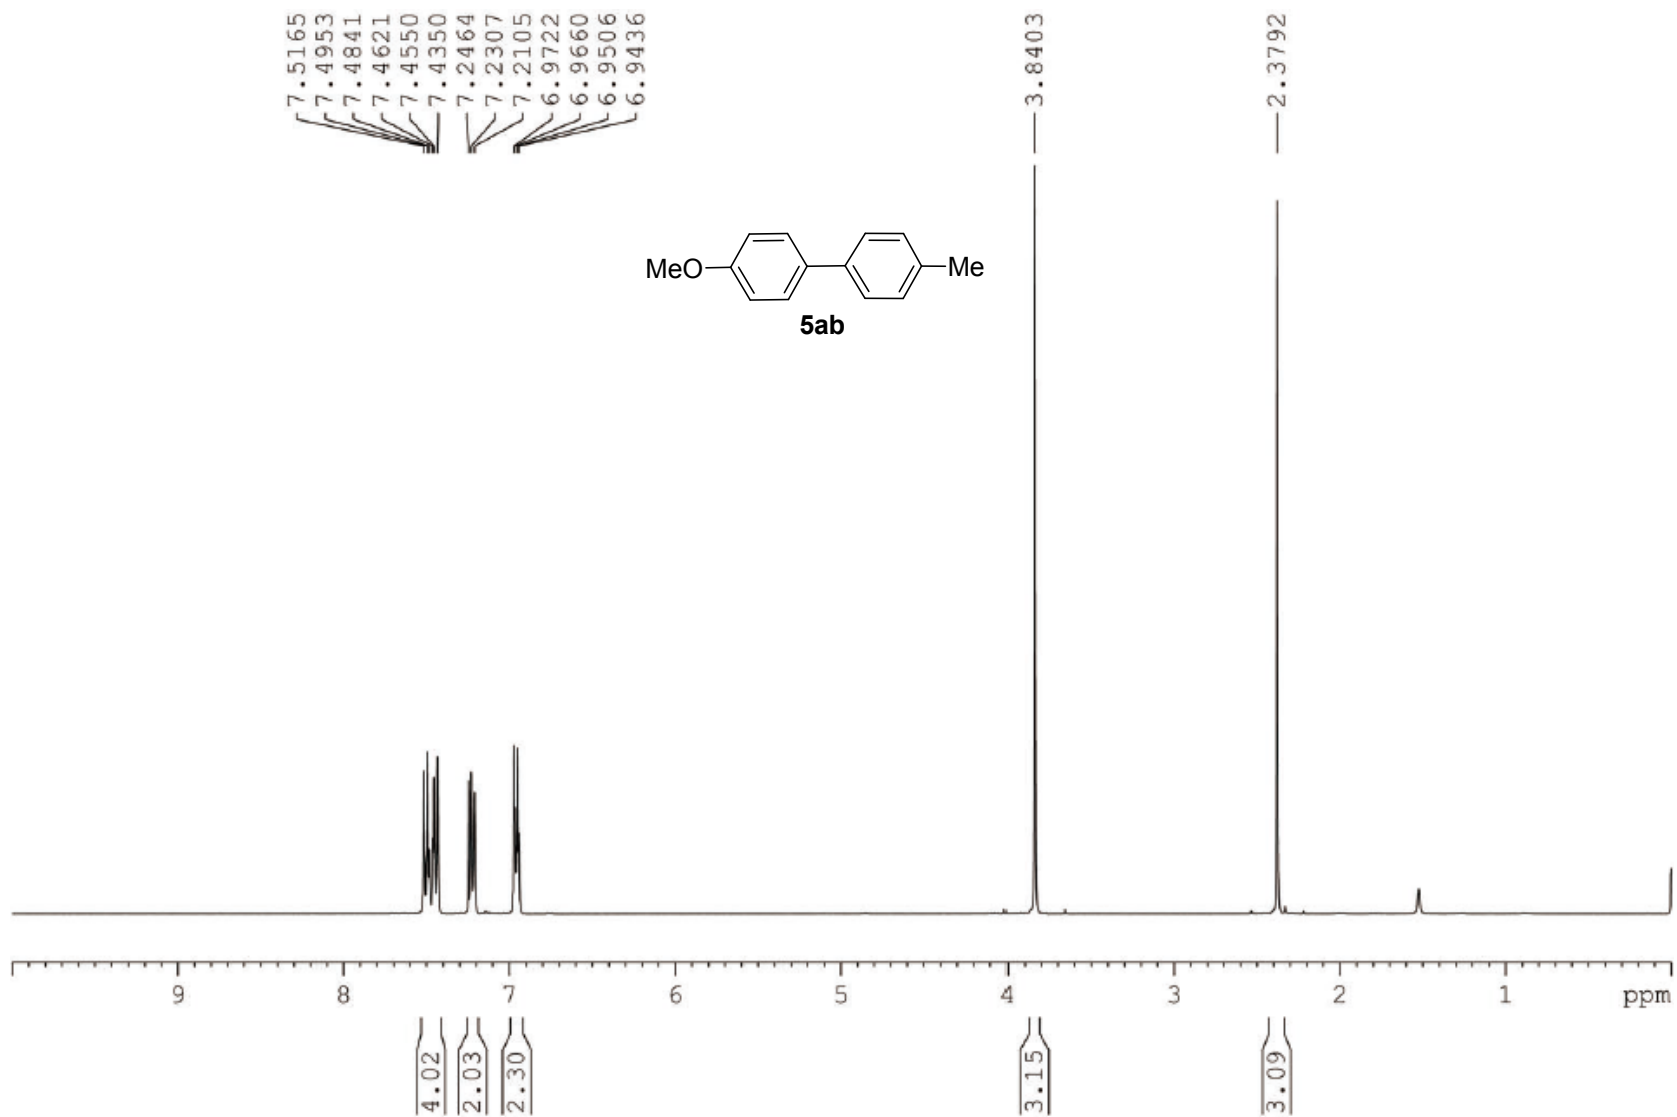

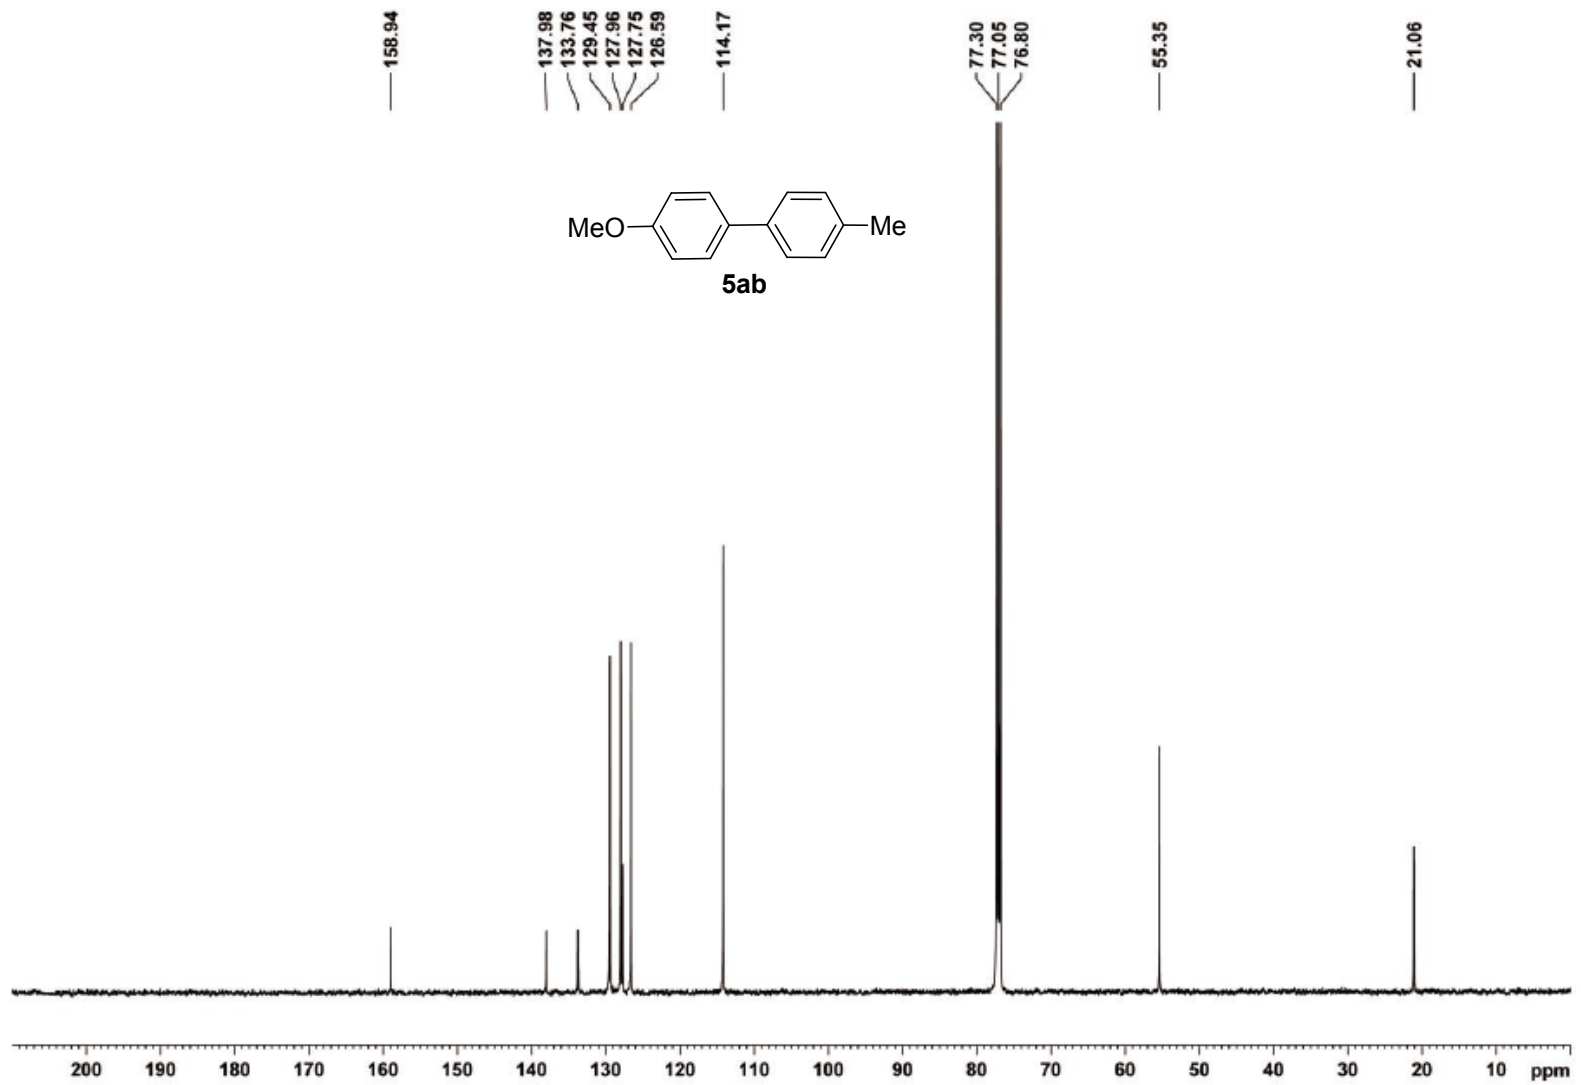

7.5601  
7.5408  
7.5189  
7.4856  
7.4638  
7.4326  
7.4139  
7.3944  
7.3183  
7.3000  
7.2815  
7.2572  
6.9906  
6.9685  
6.9456

— 3.8534

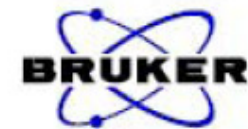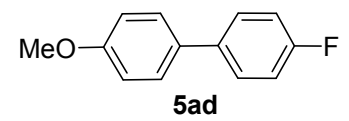

```

NAME      229-10-1
EXPNO     1
PROCNO    1
Date_     20120524
Time      15.11
INSTRUM   spect
PROBHD    5 mm PABBO 90-
PULPROG   zg30
TD         65536
SOLVENT   CDCl3
NS         16
DS         2
SWH        0225.685 Hz
FIDRES     0.125403 Hz
AQ         3.9046207 sec
RG         203
IN         60.000 usec
DE         6.50 usec
TE         296.5 K
PR         1.00000000 sec
YD0        1
  
```

```

----- CHANNEL f1 -----
NUC1       1H
P1         13.00 usec
PL1        -1.00 dB
PL12       13.18669796 W
SFO1       400.1724712 MHz
SI         32768
SF         400.1700045 MHz
NEW        0
GB         0
GB2        0.30 Hz
GR         0
PC         1.00
  
```

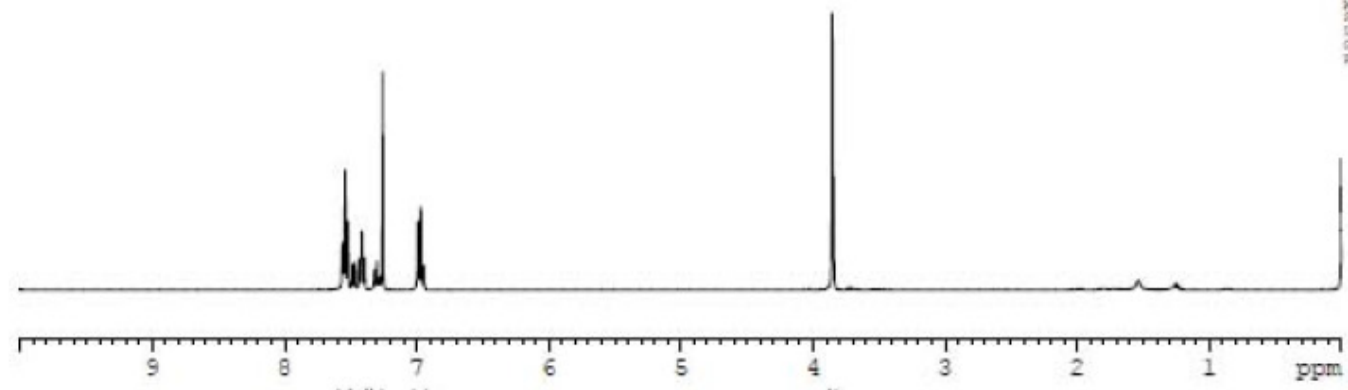

3.00  
2.09  
1.03  
2.08  
3.08

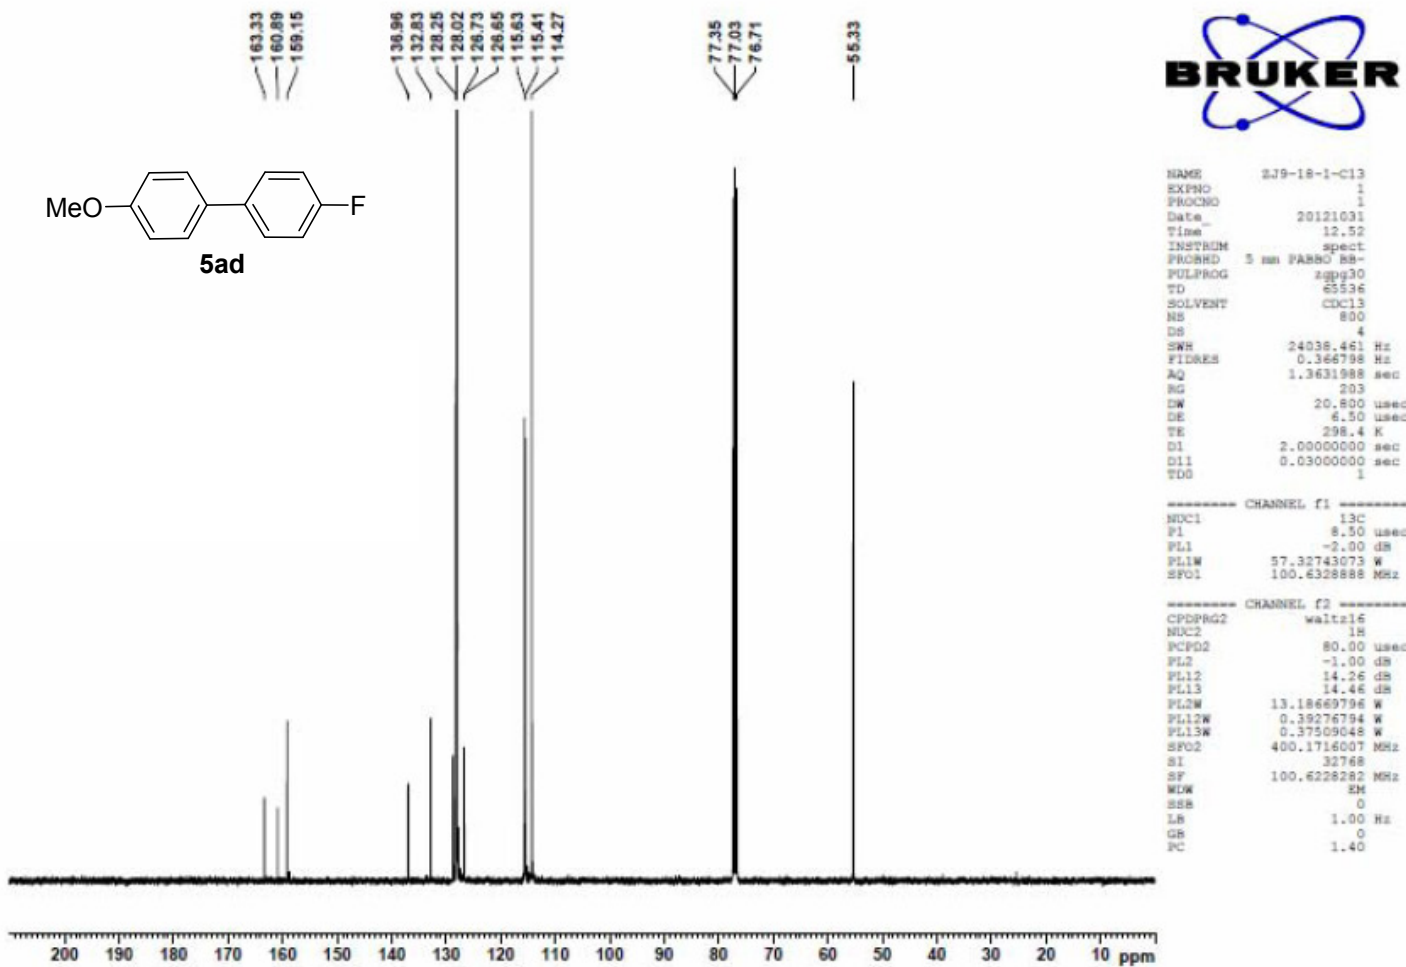



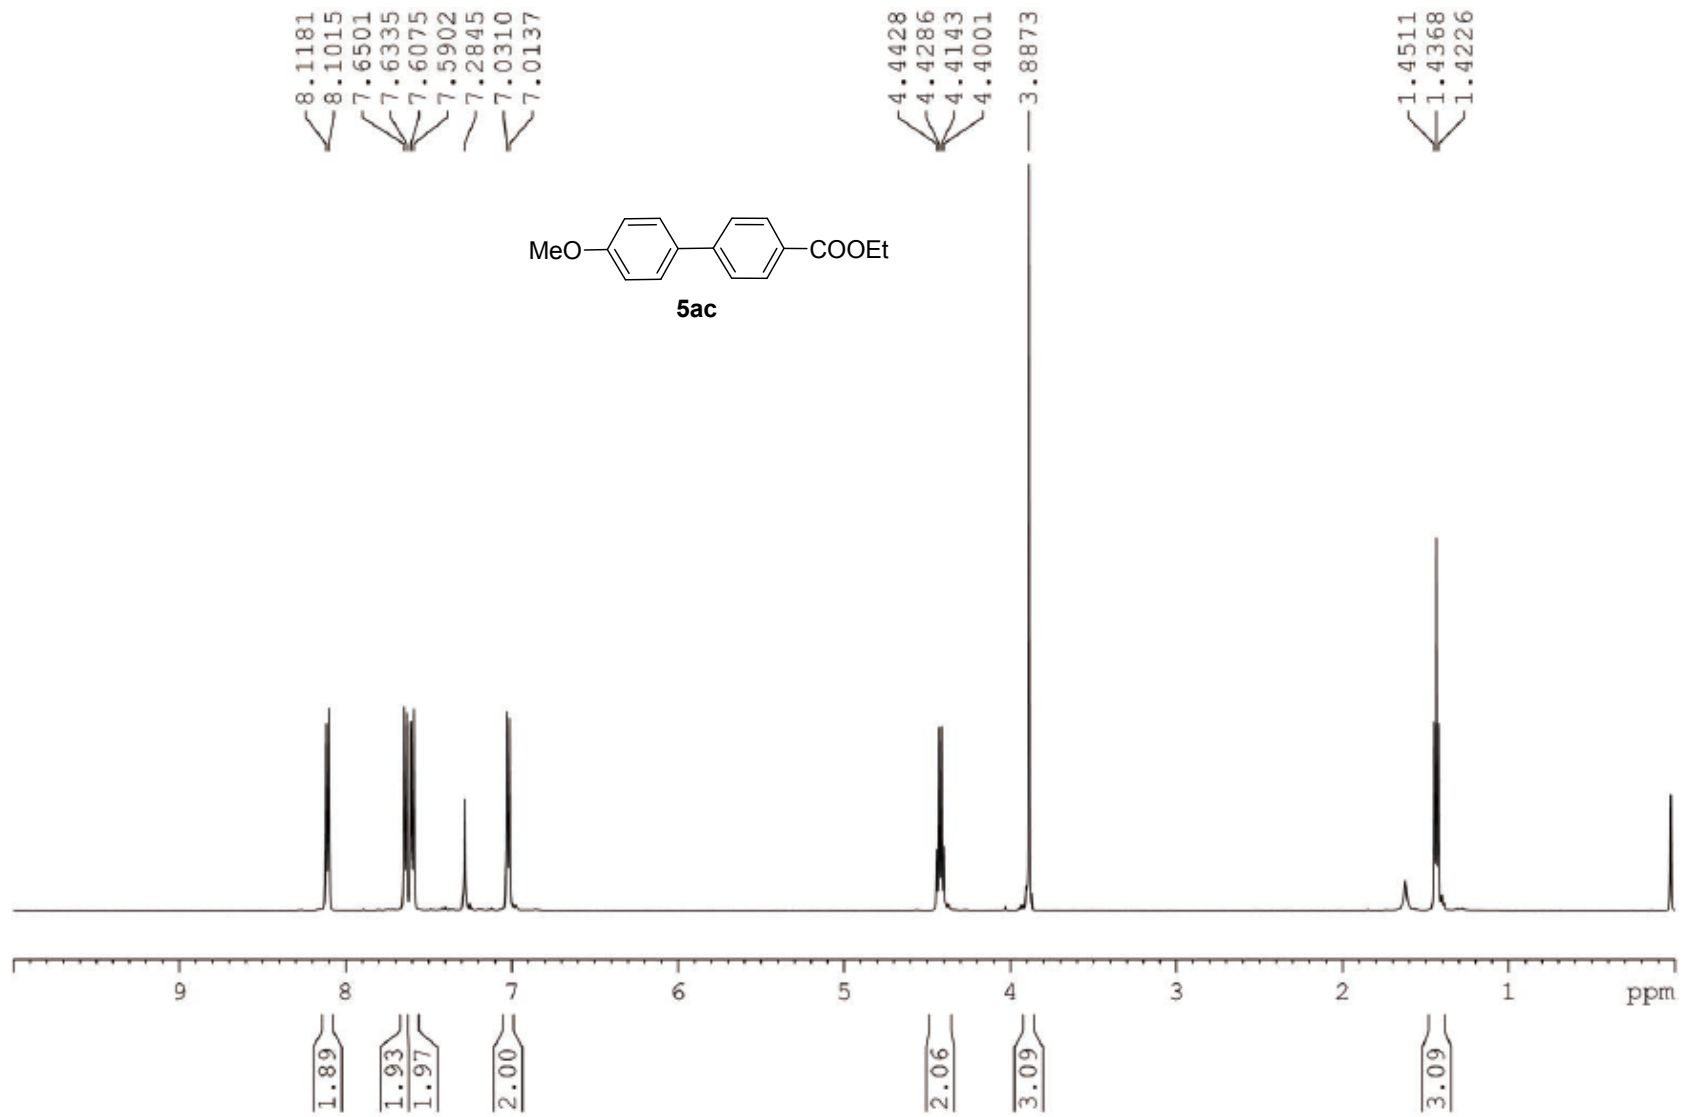

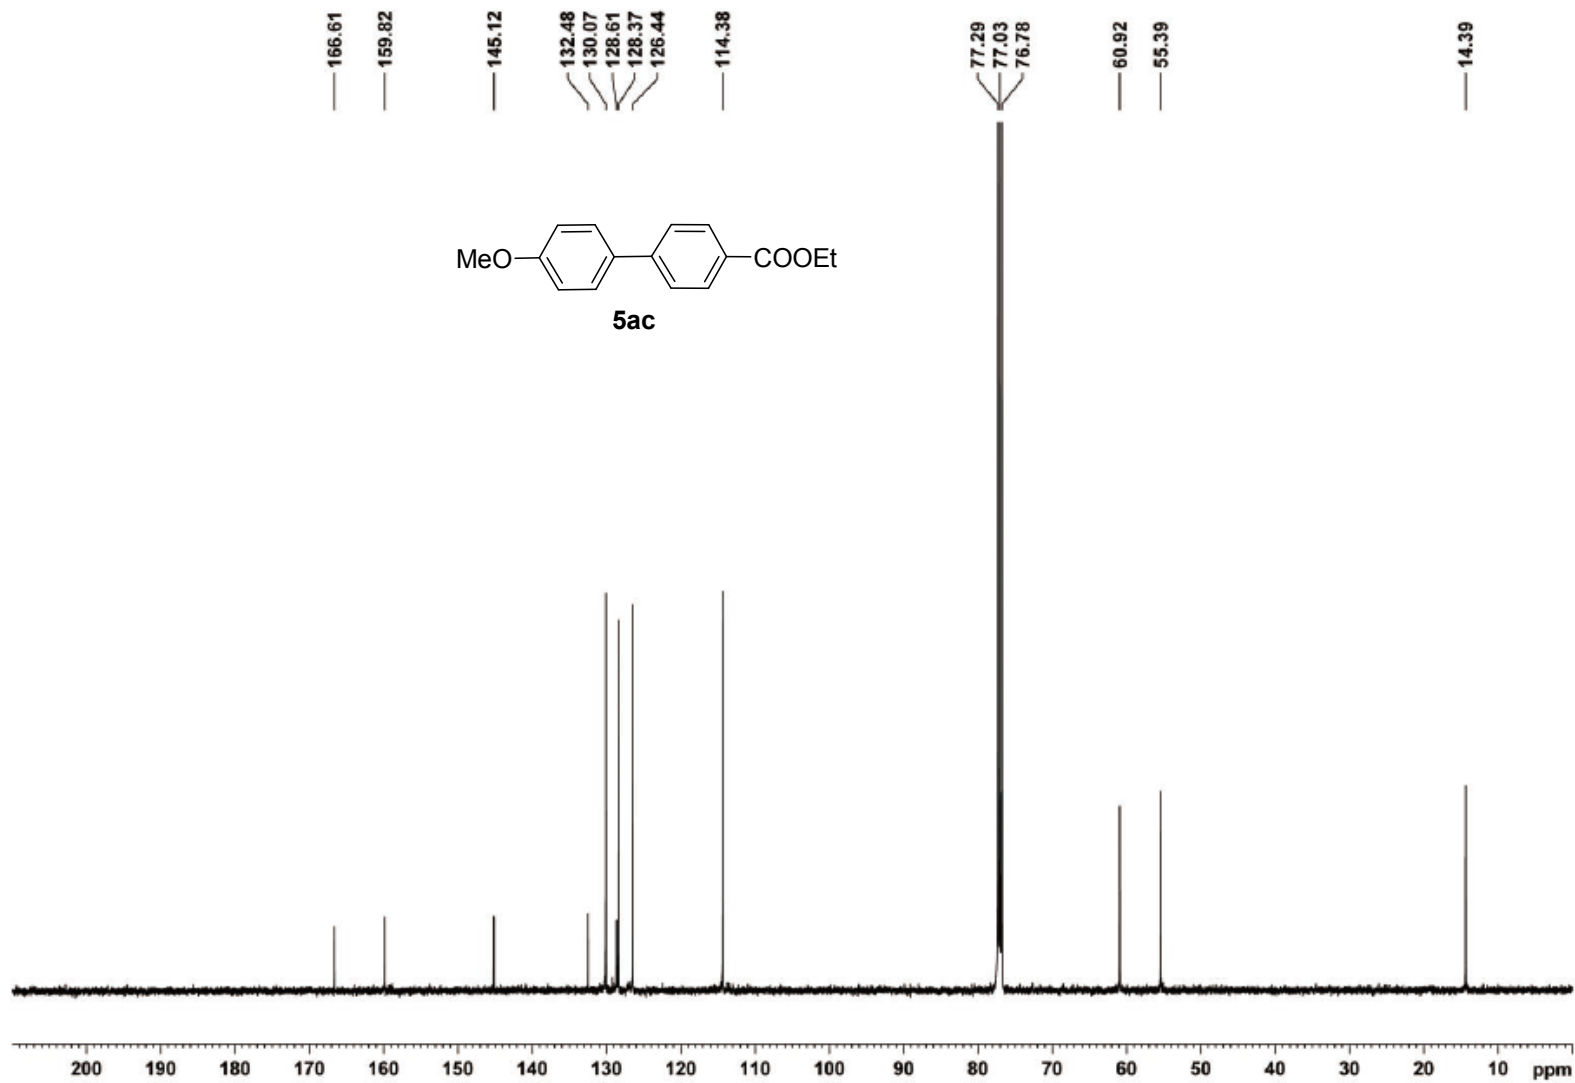

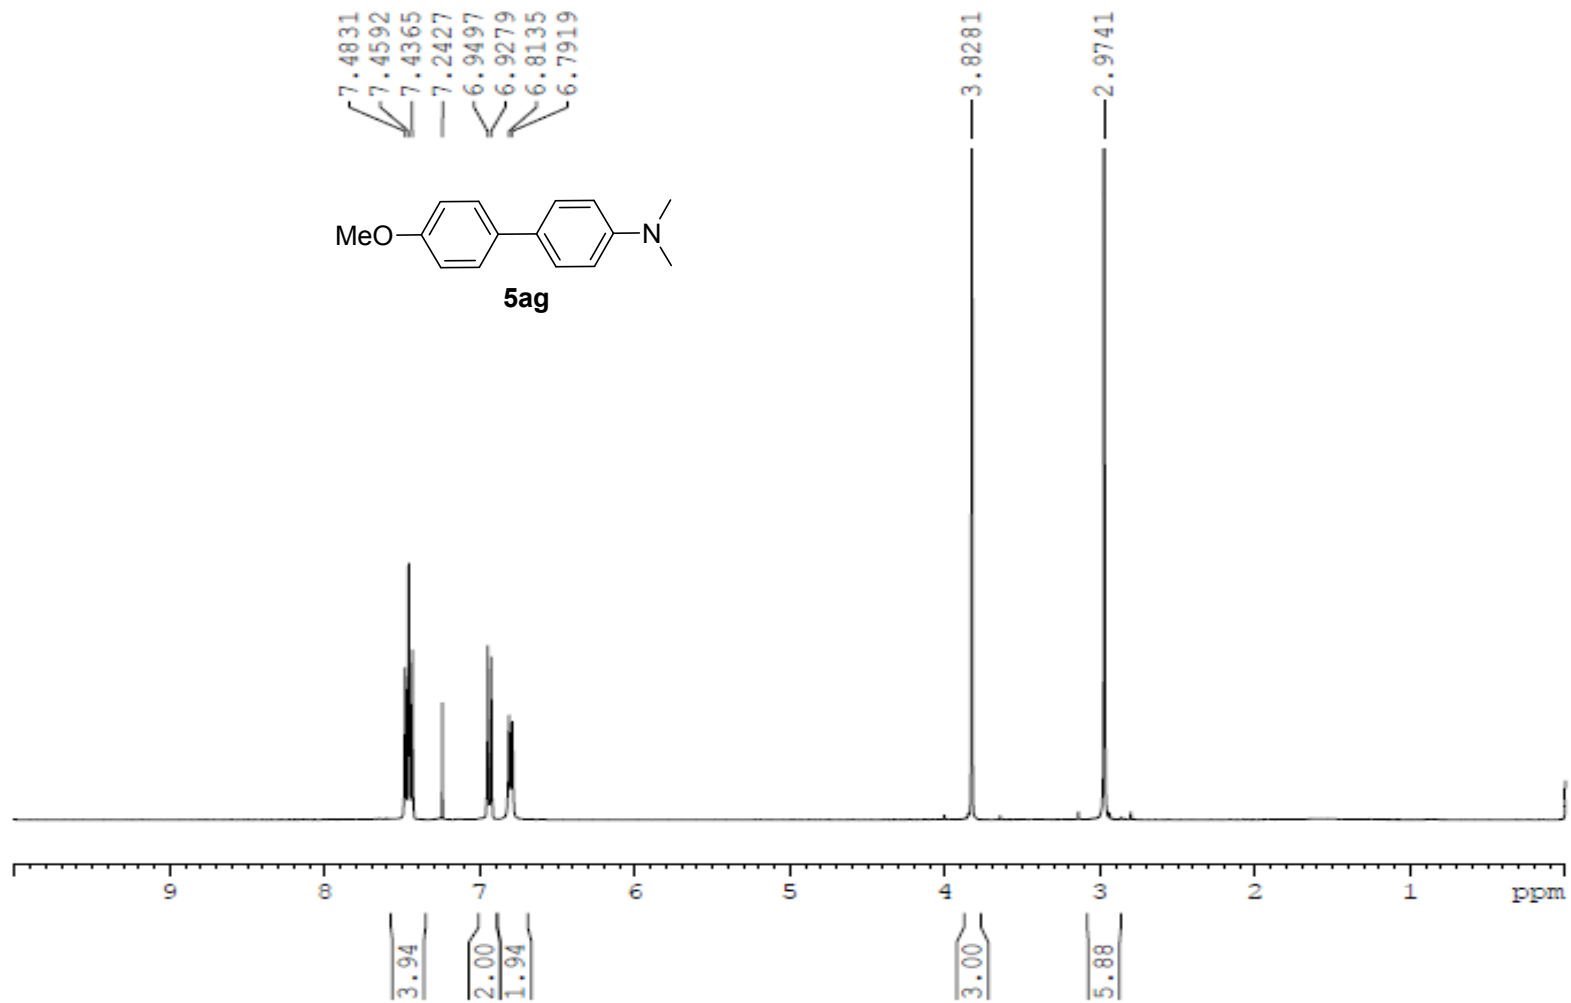

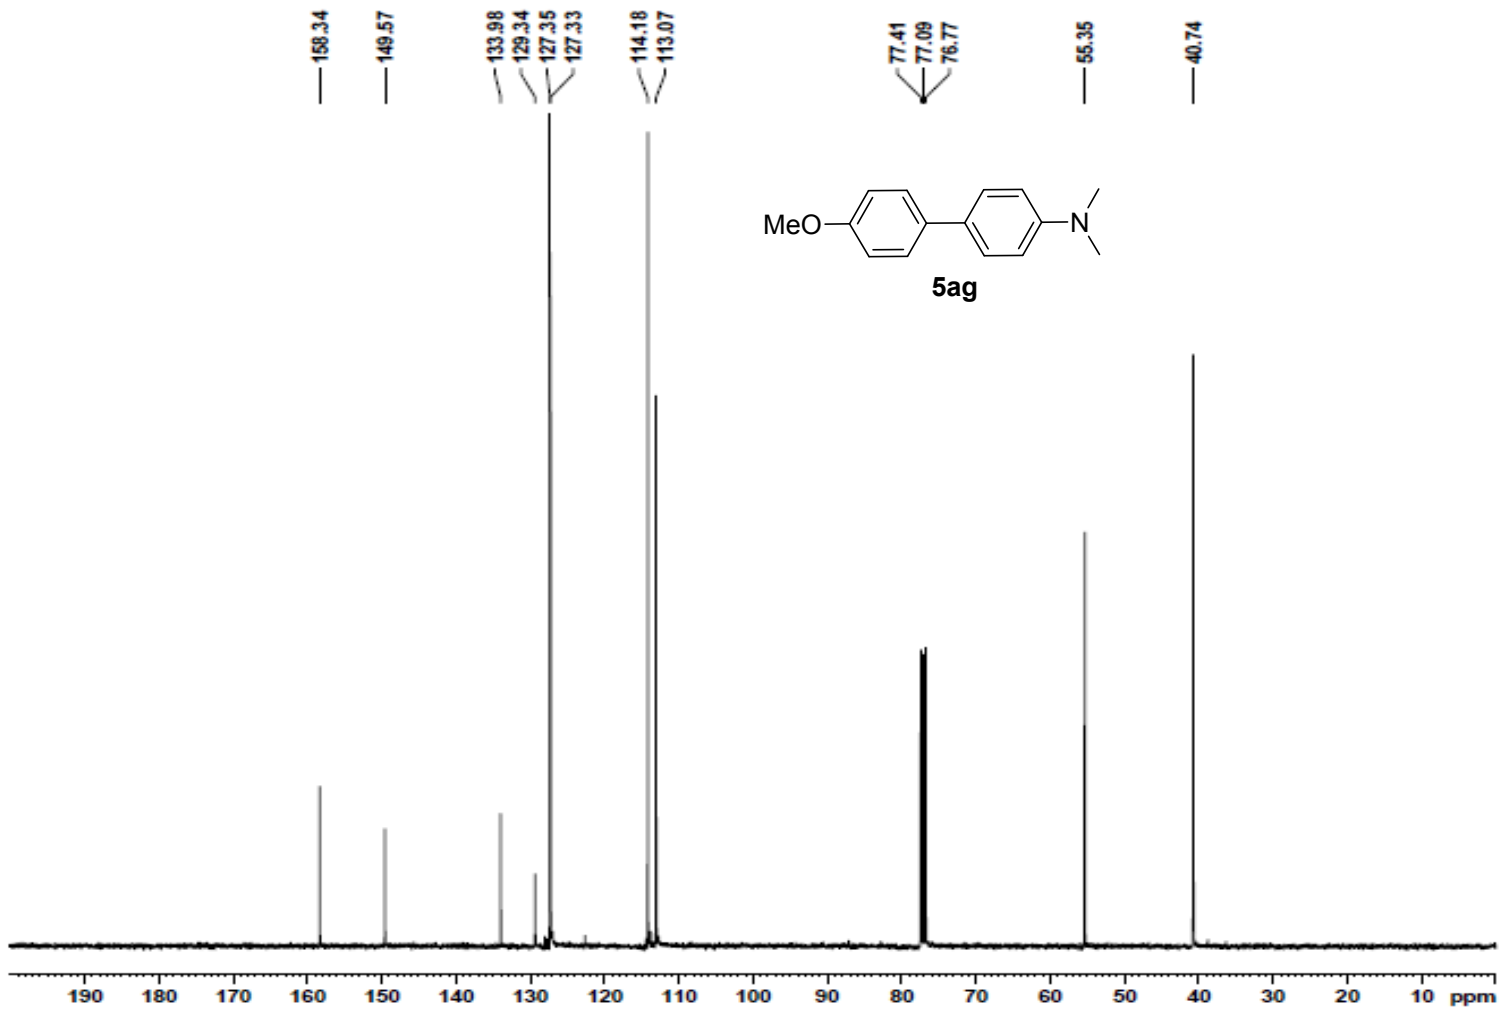

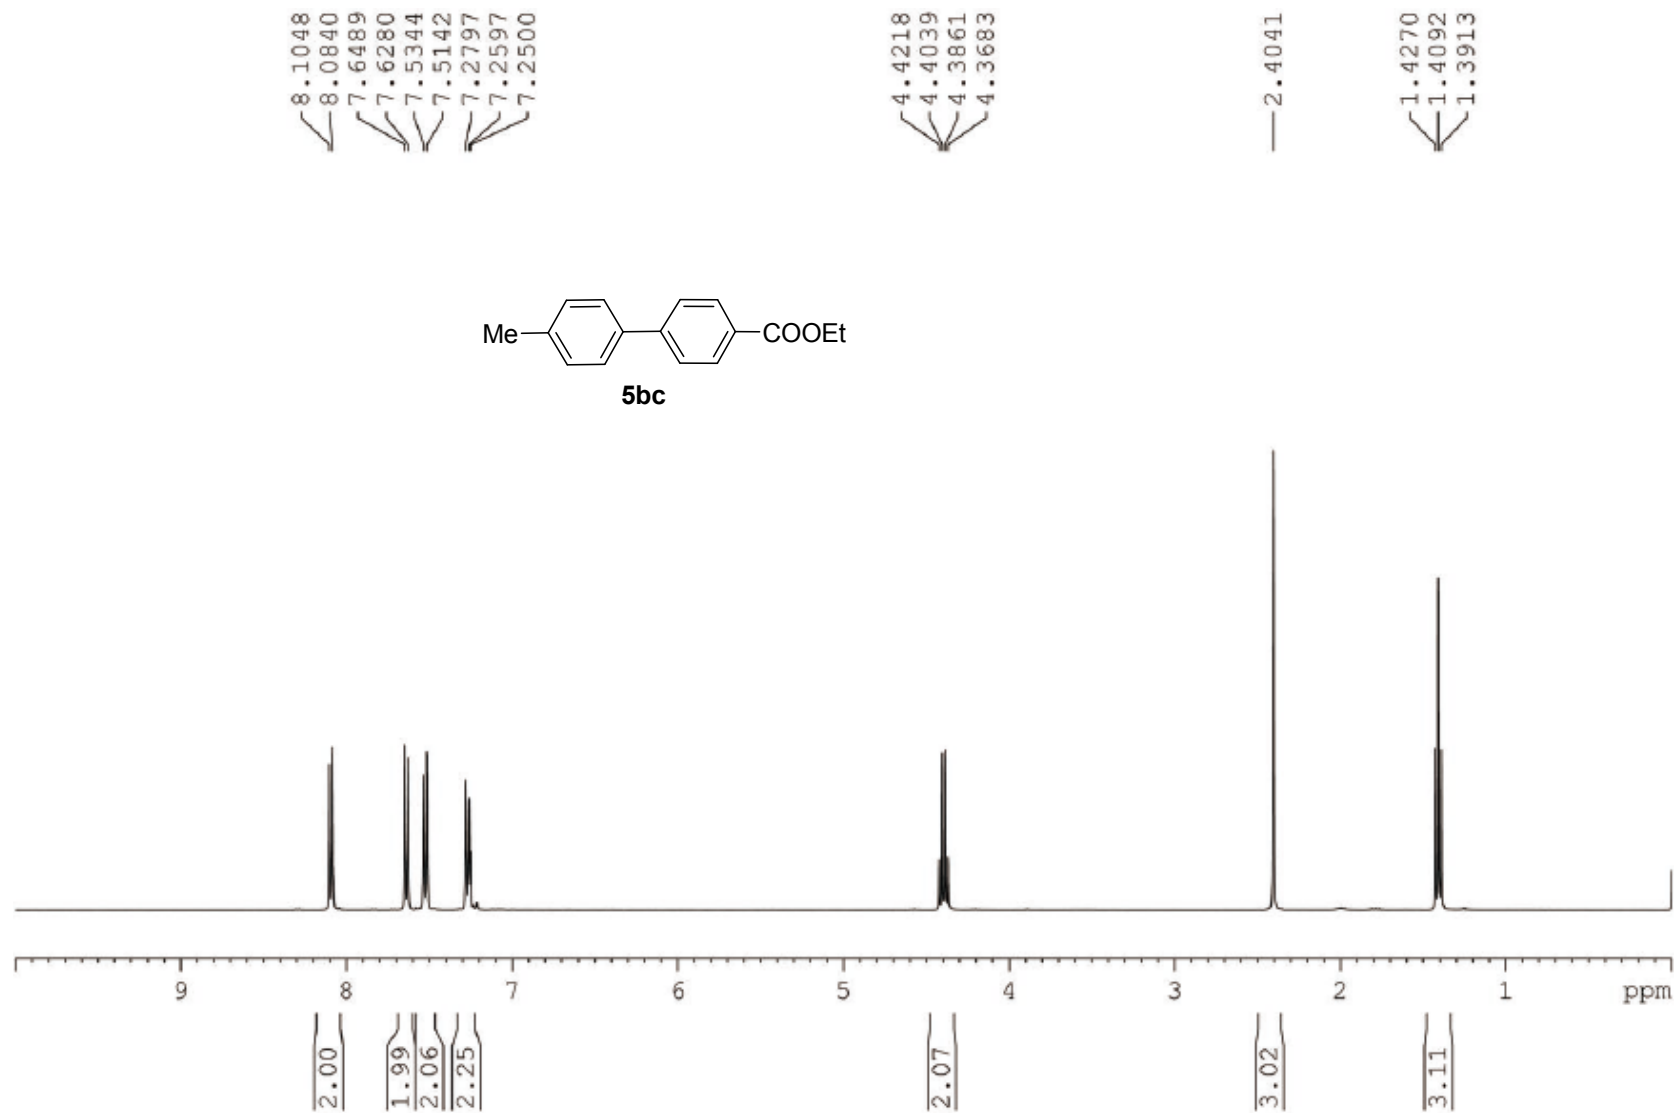

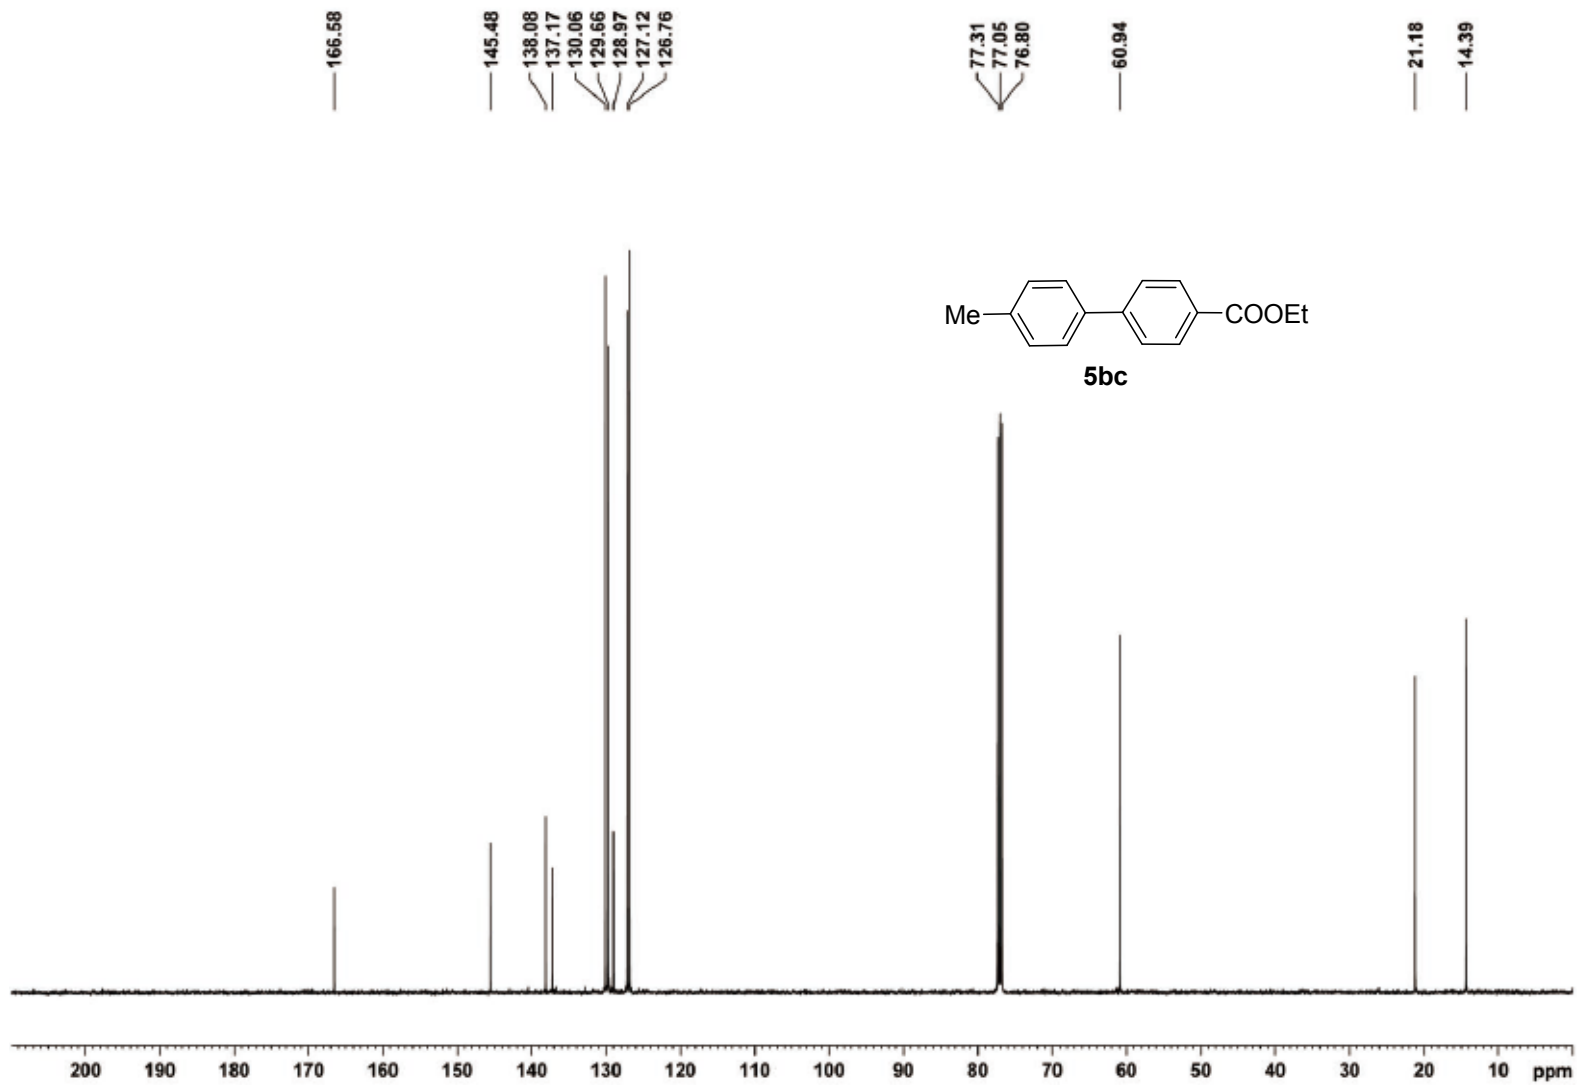

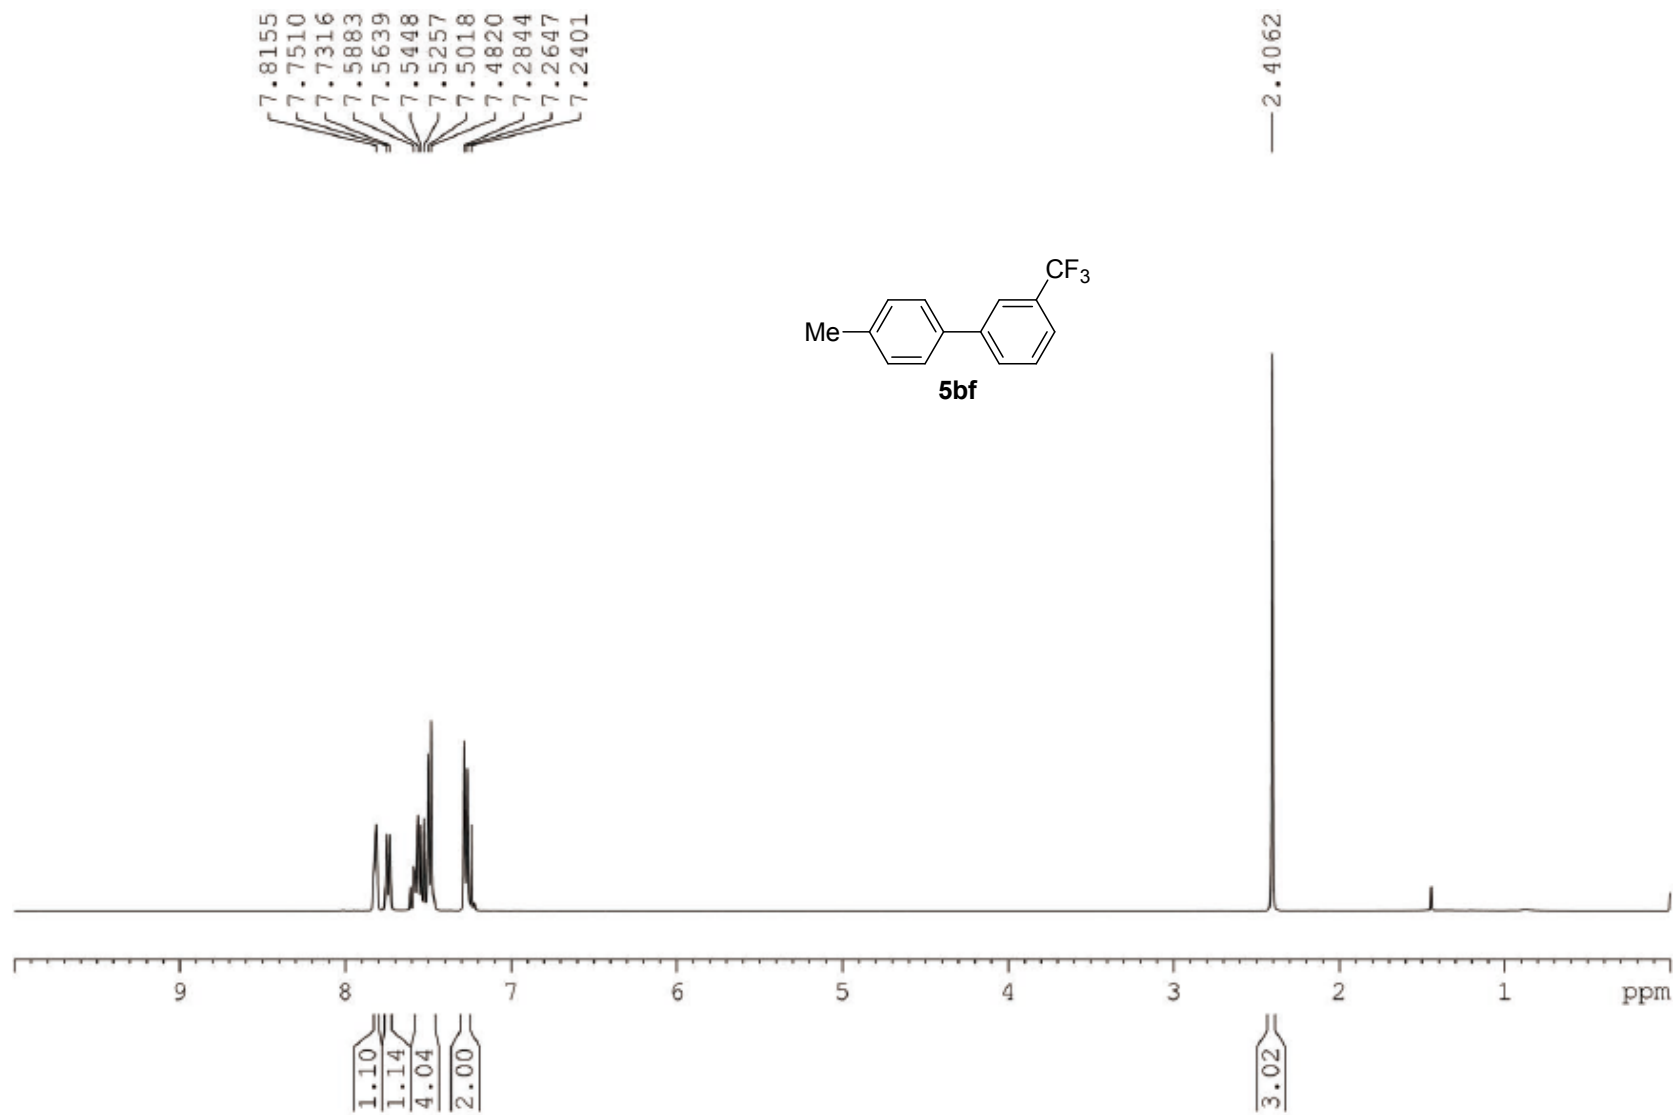

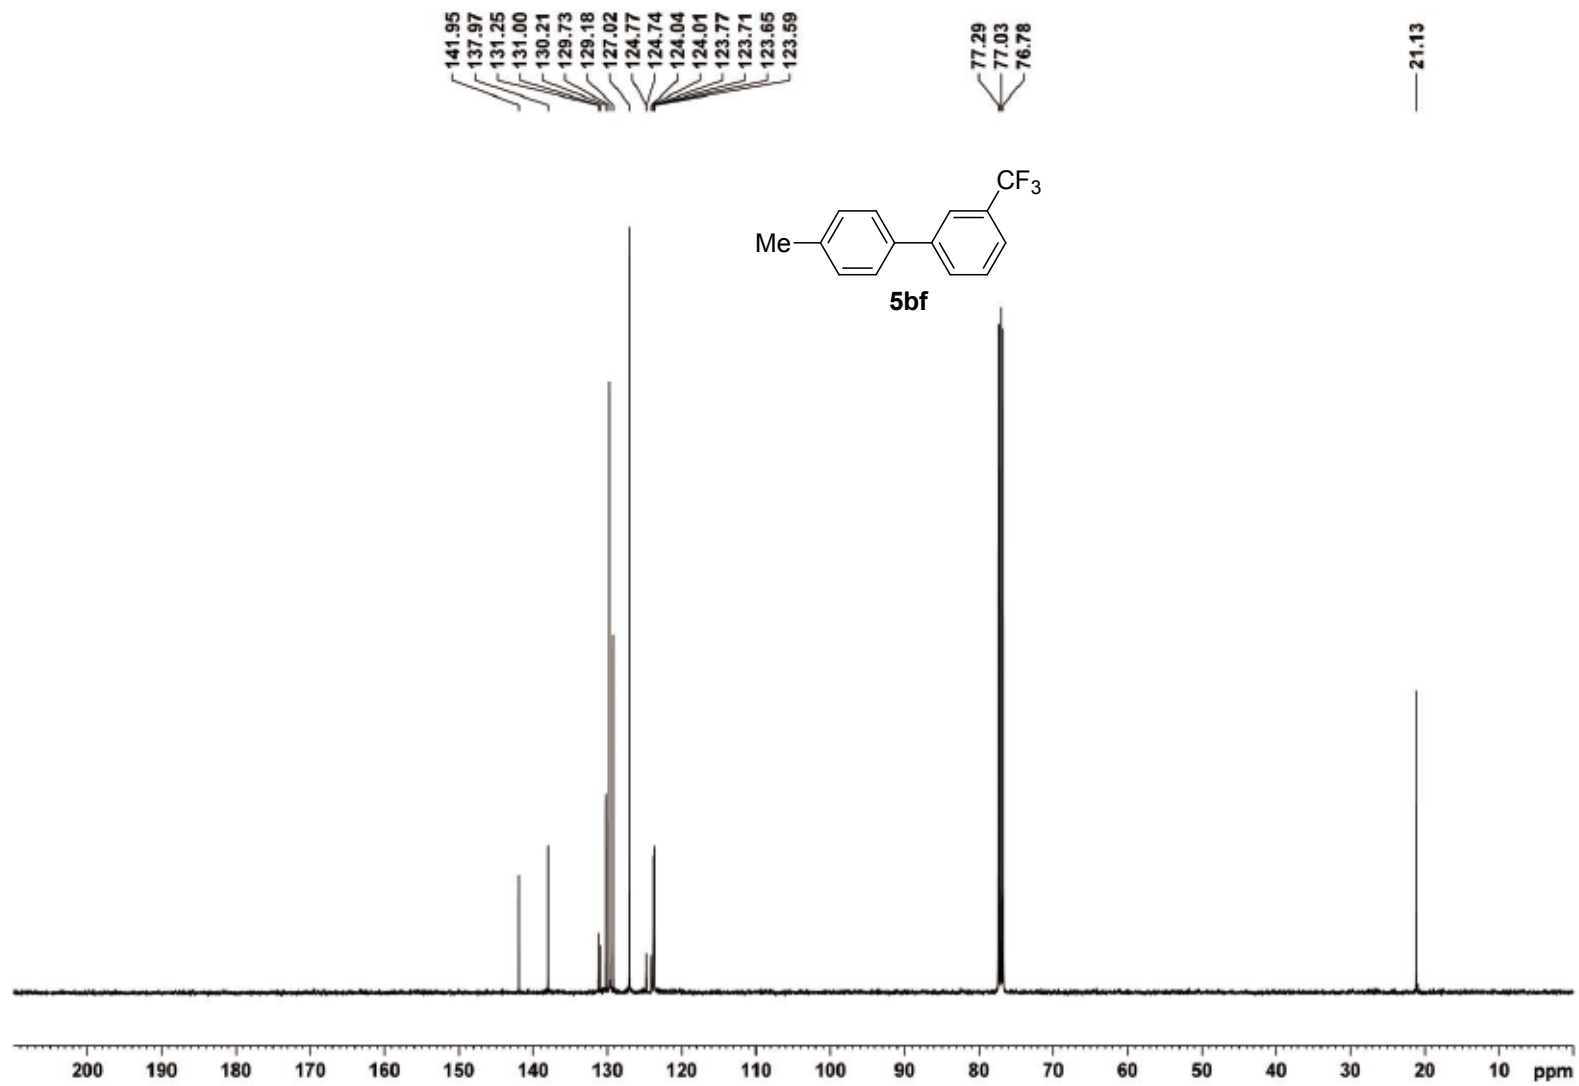



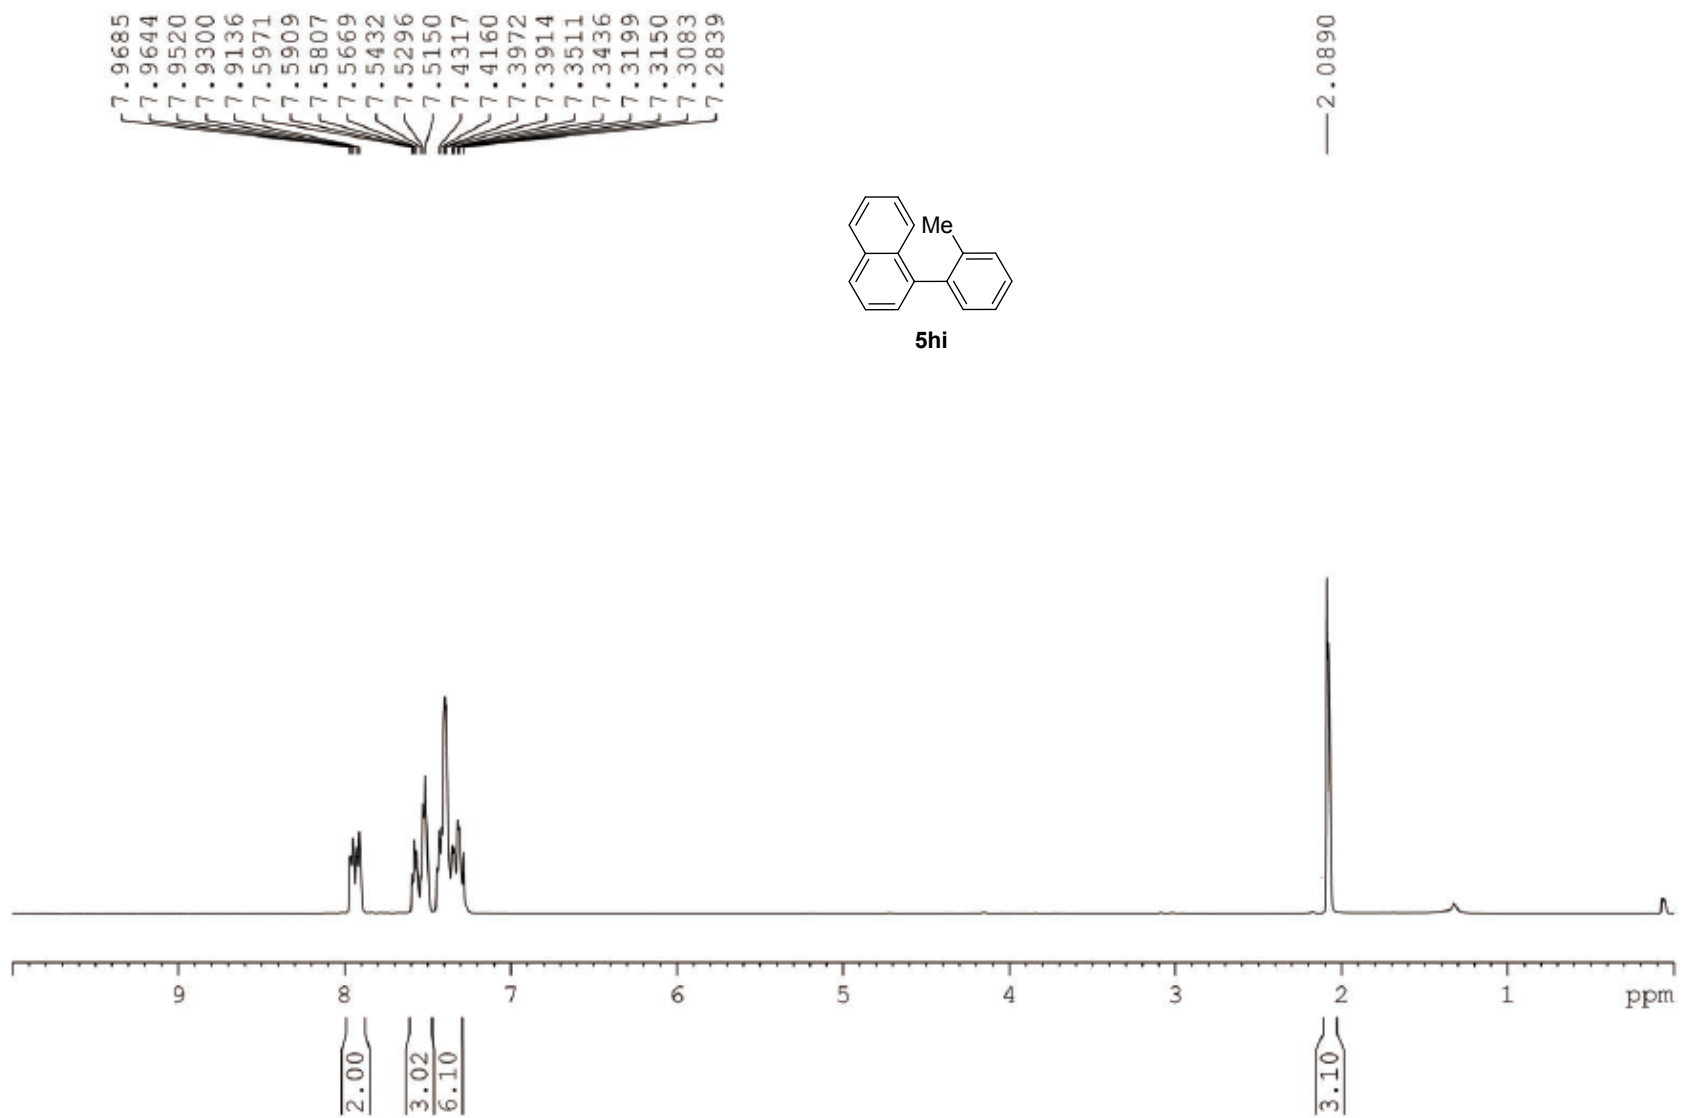

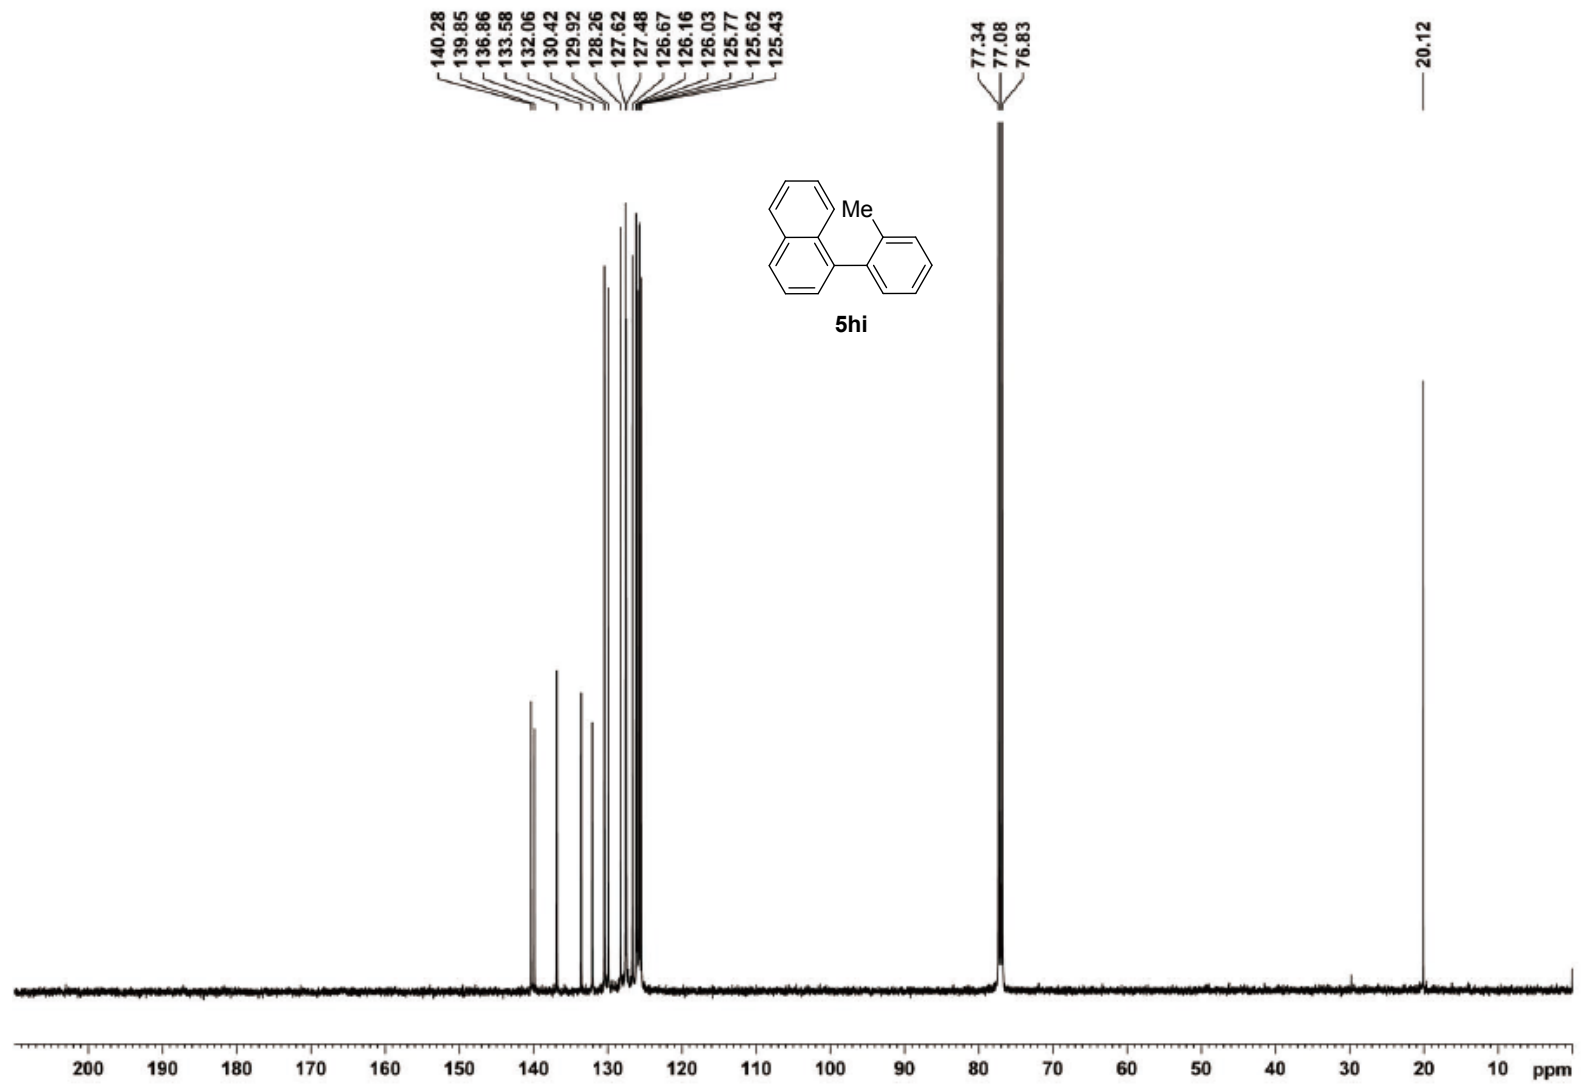

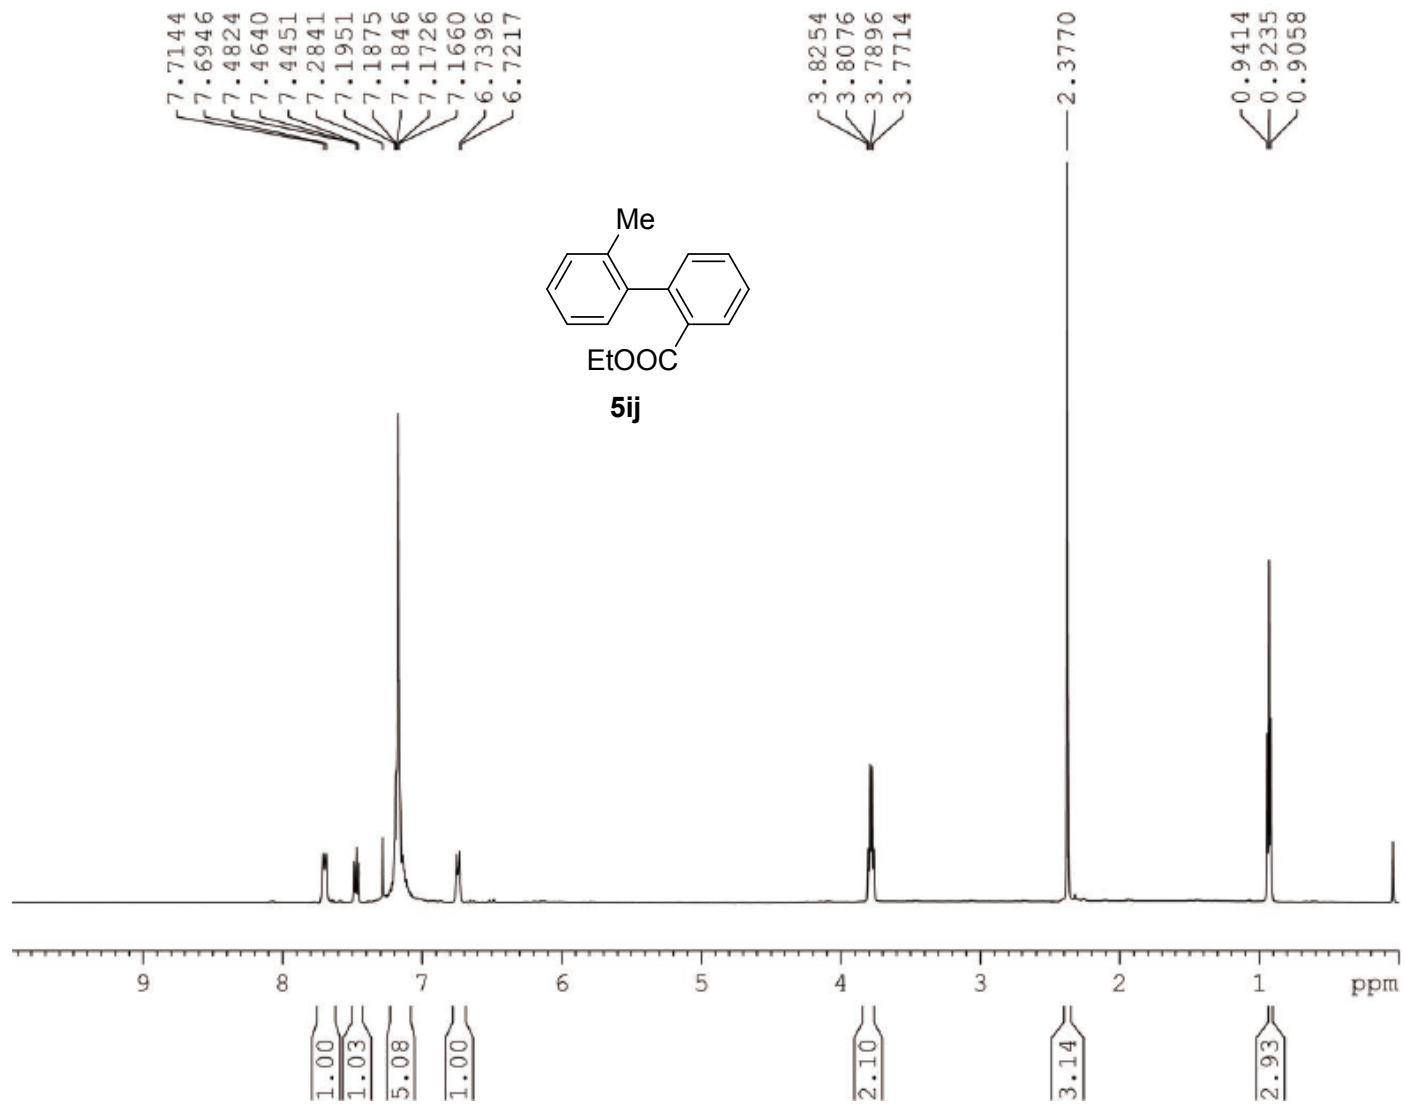

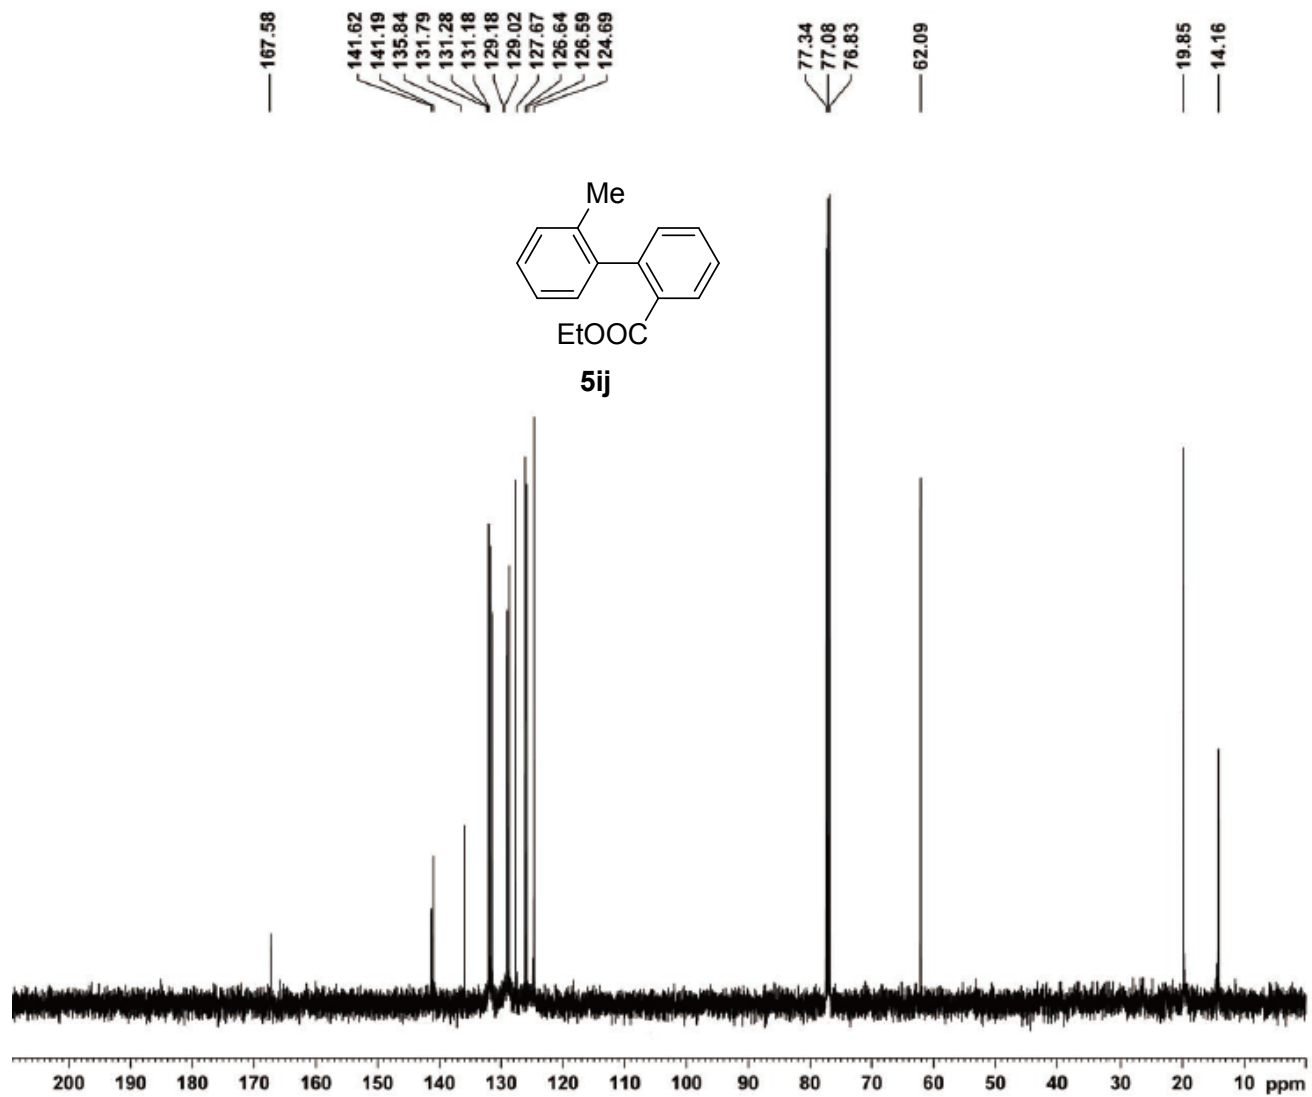

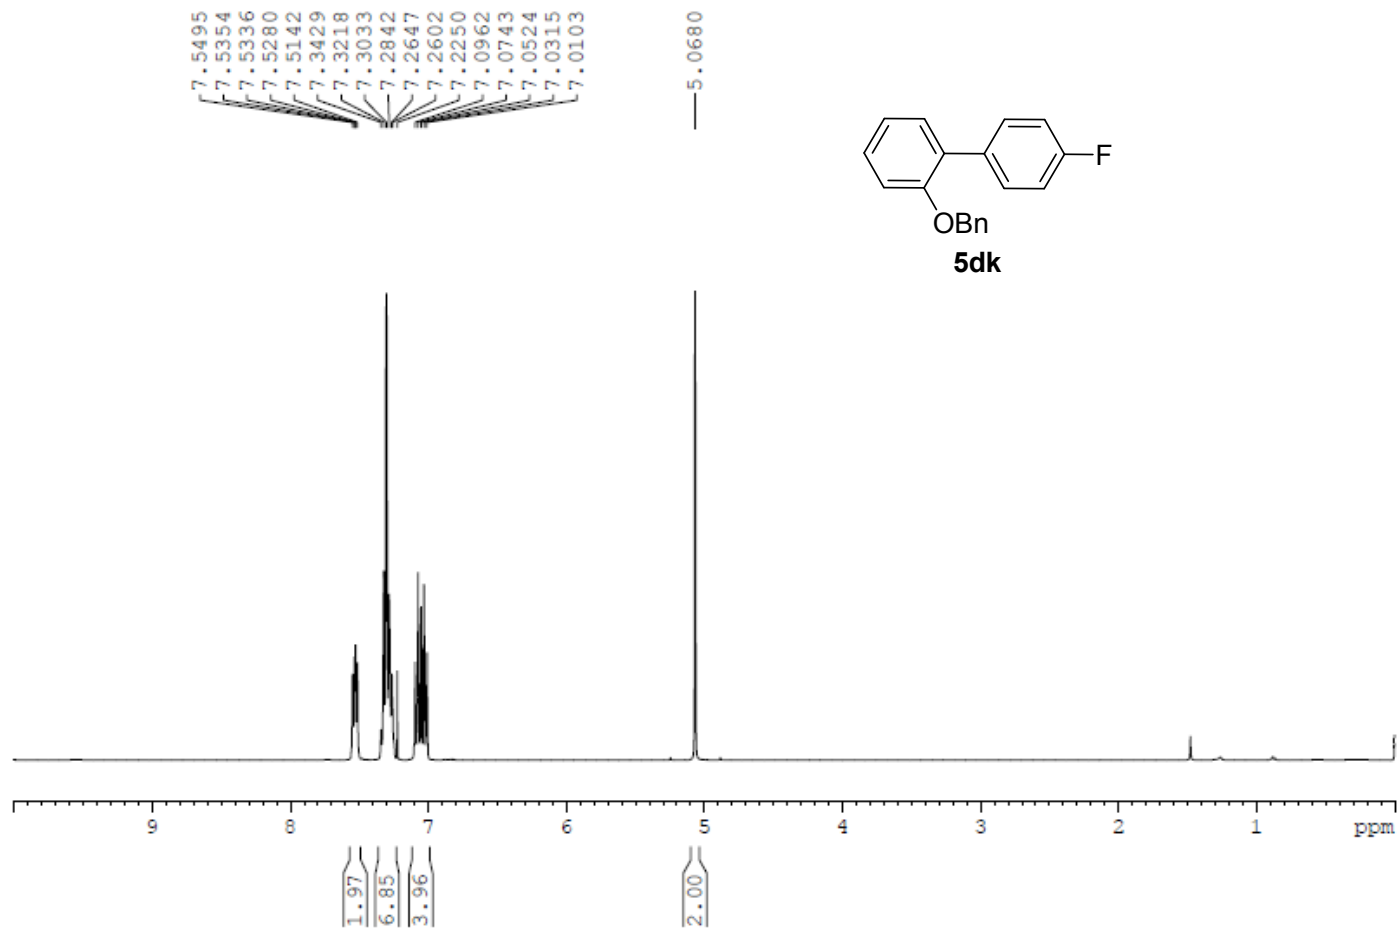

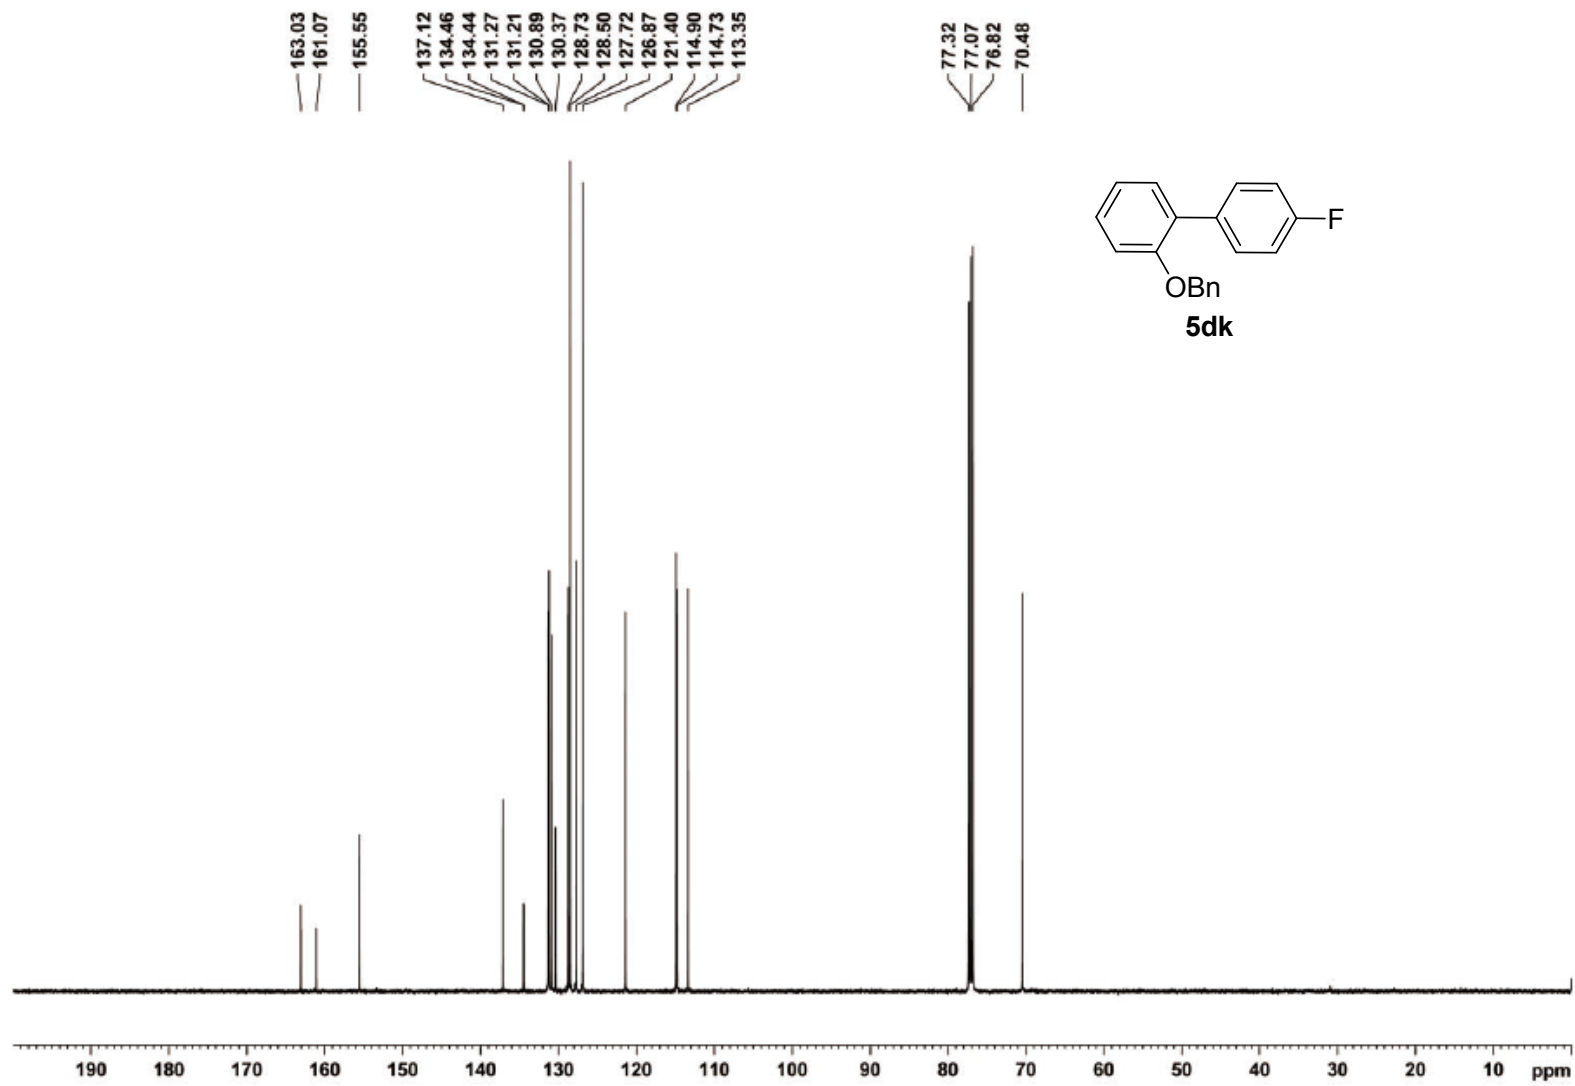

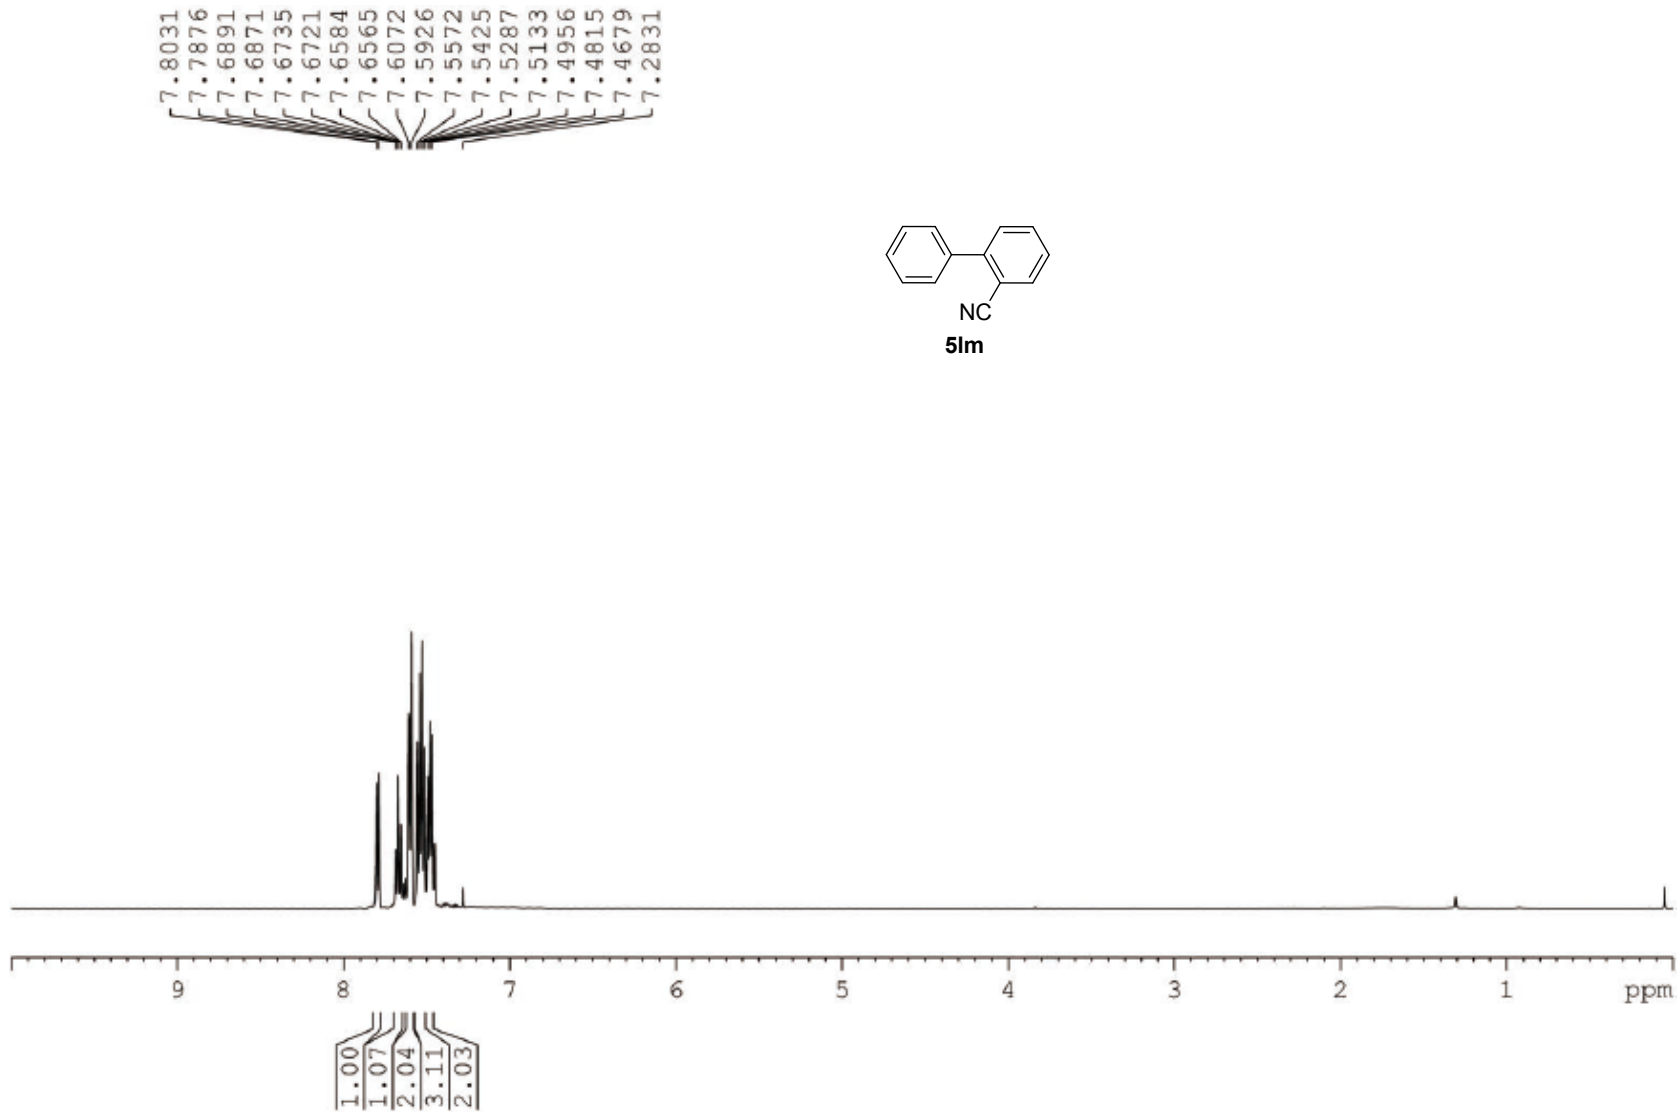

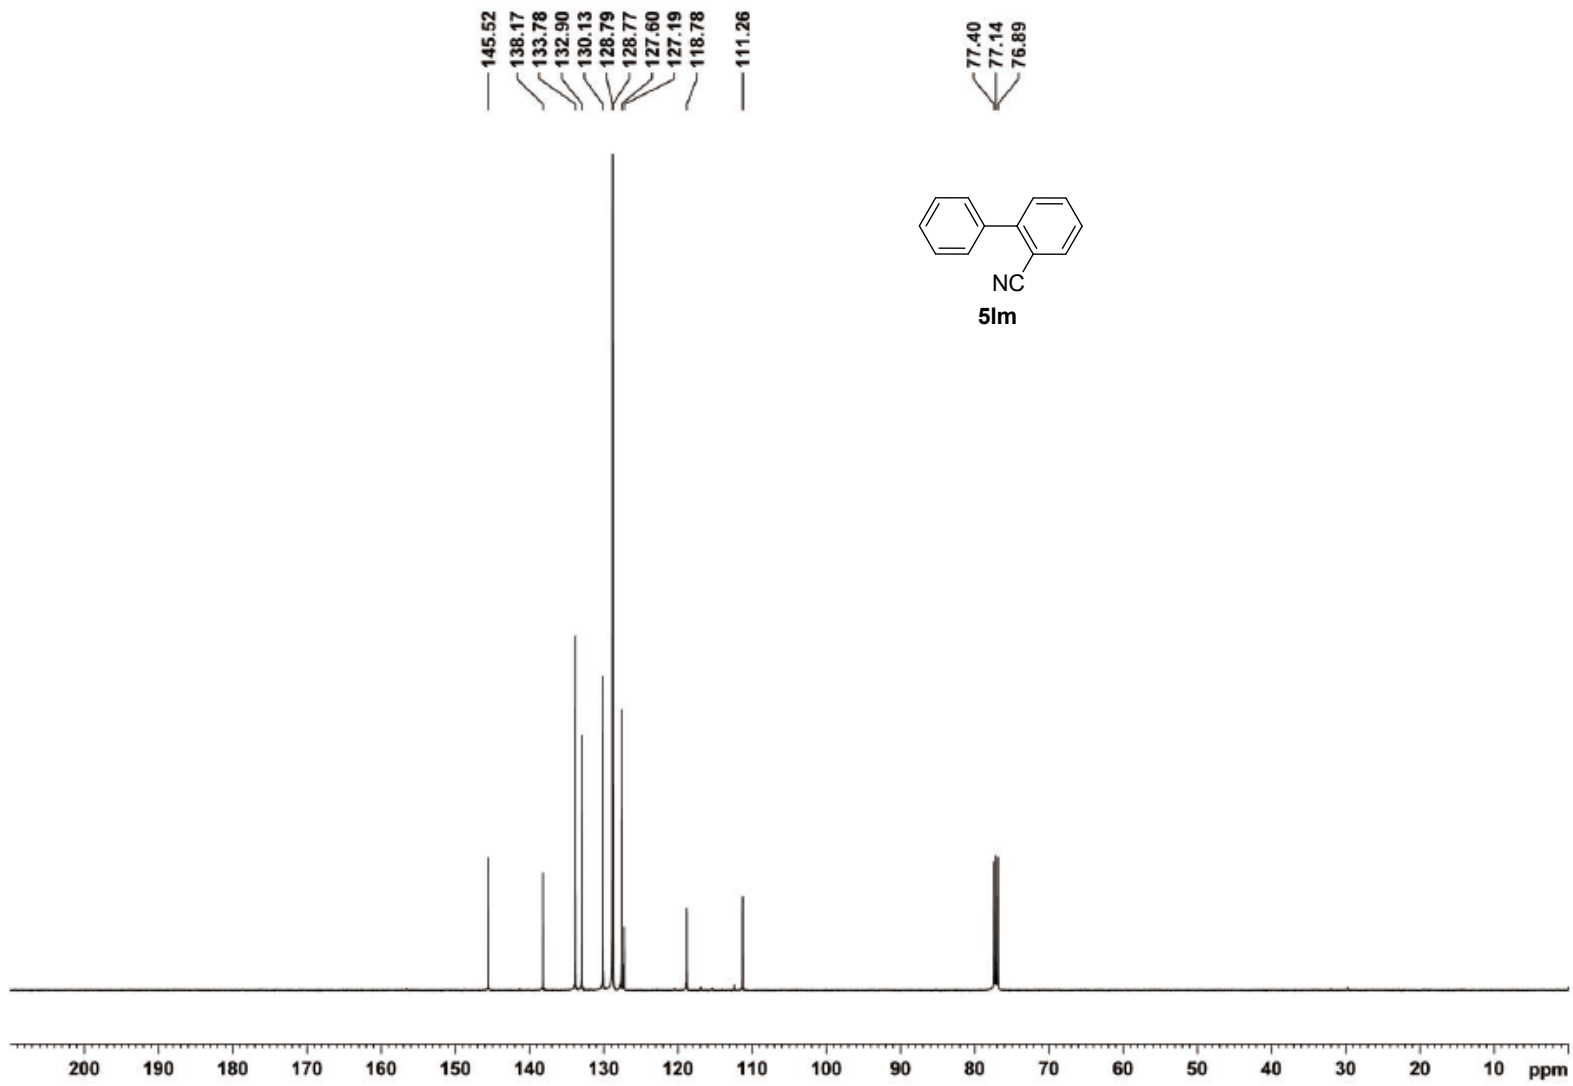



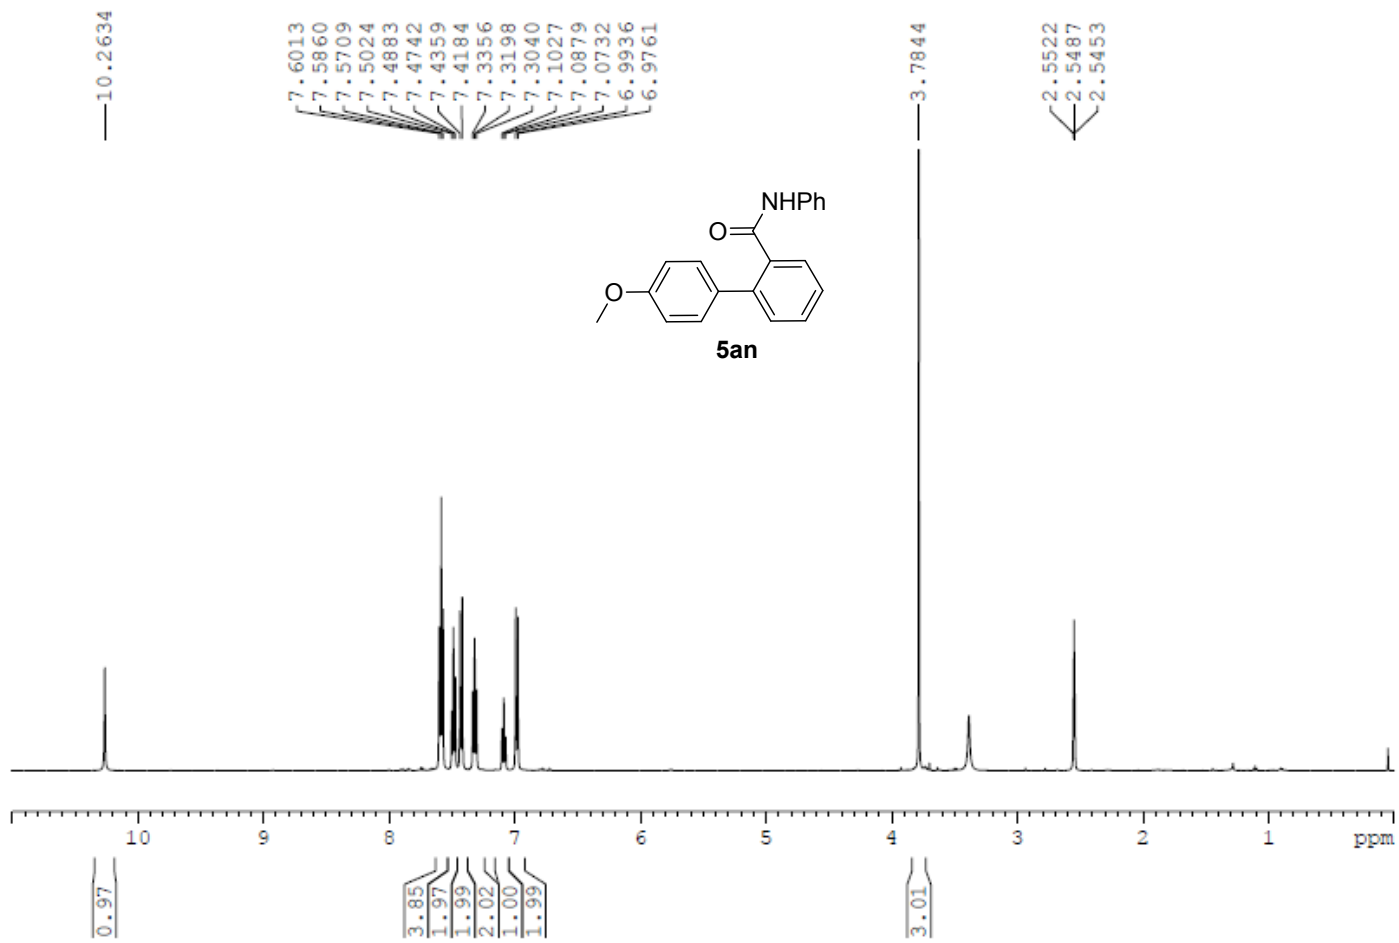

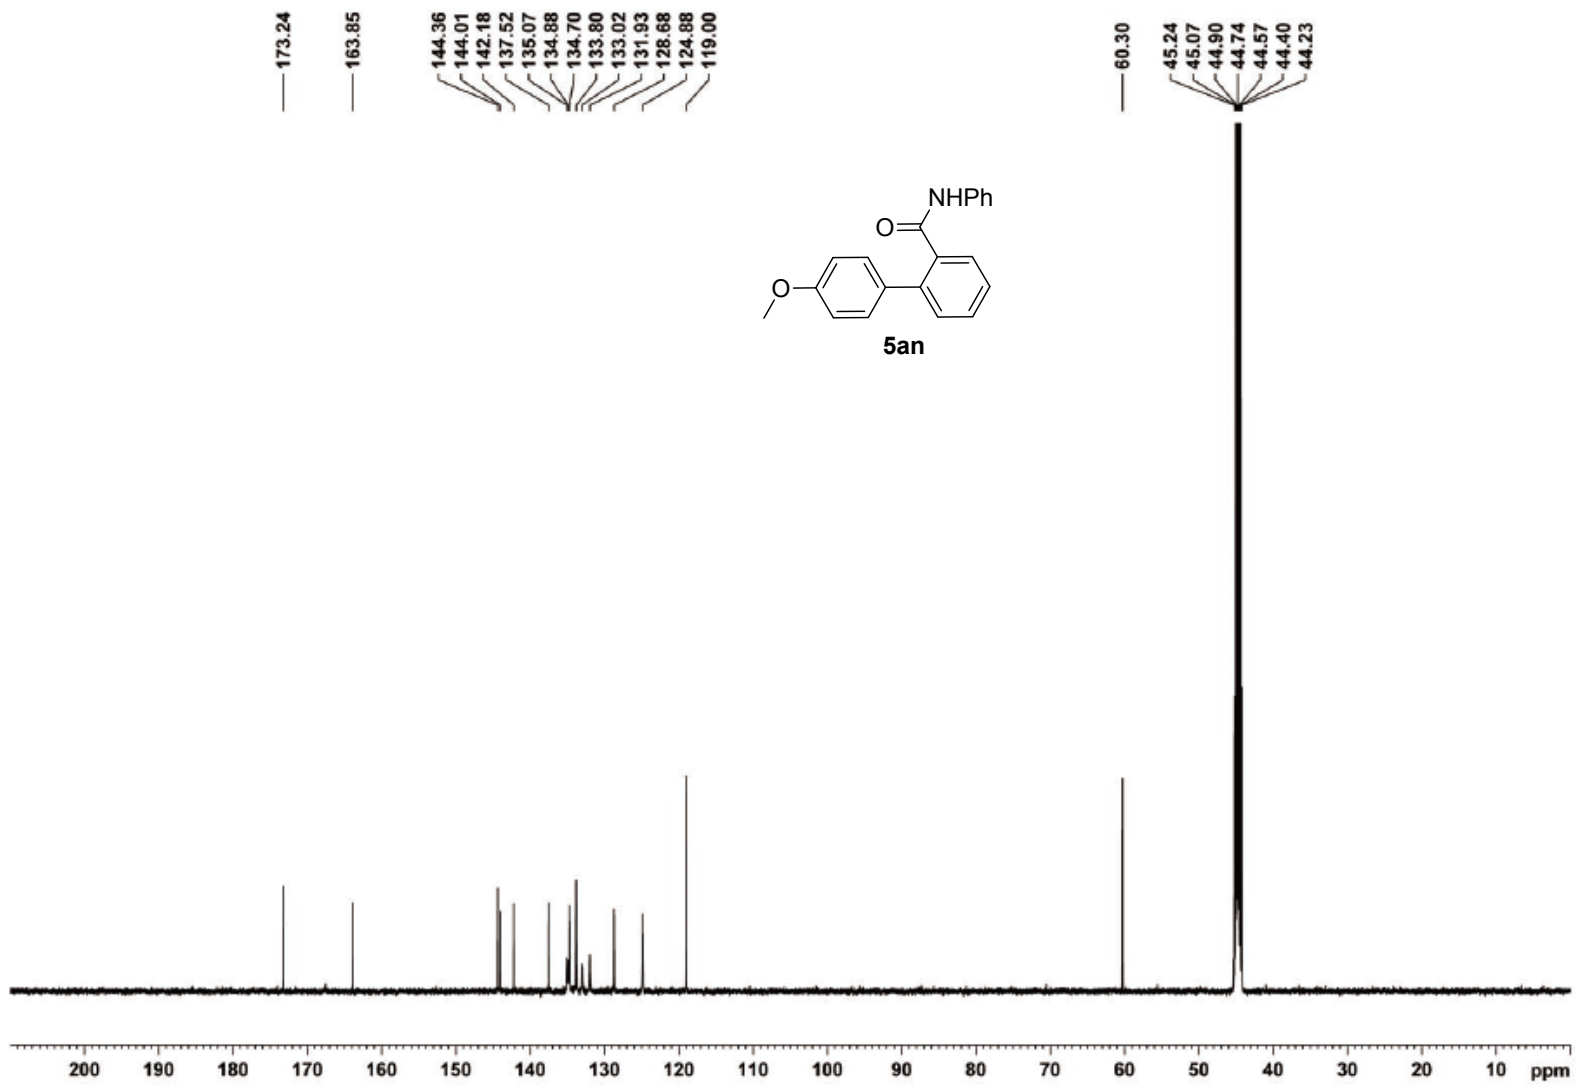

7.8584  
7.8423  
7.6232  
7.6071  
7.5981  
7.5864  
7.5813  
7.5703  
7.2841  
7.1818  
7.1648  
7.1479  
— 6.2734

3.0670  
3.0603

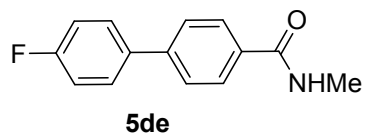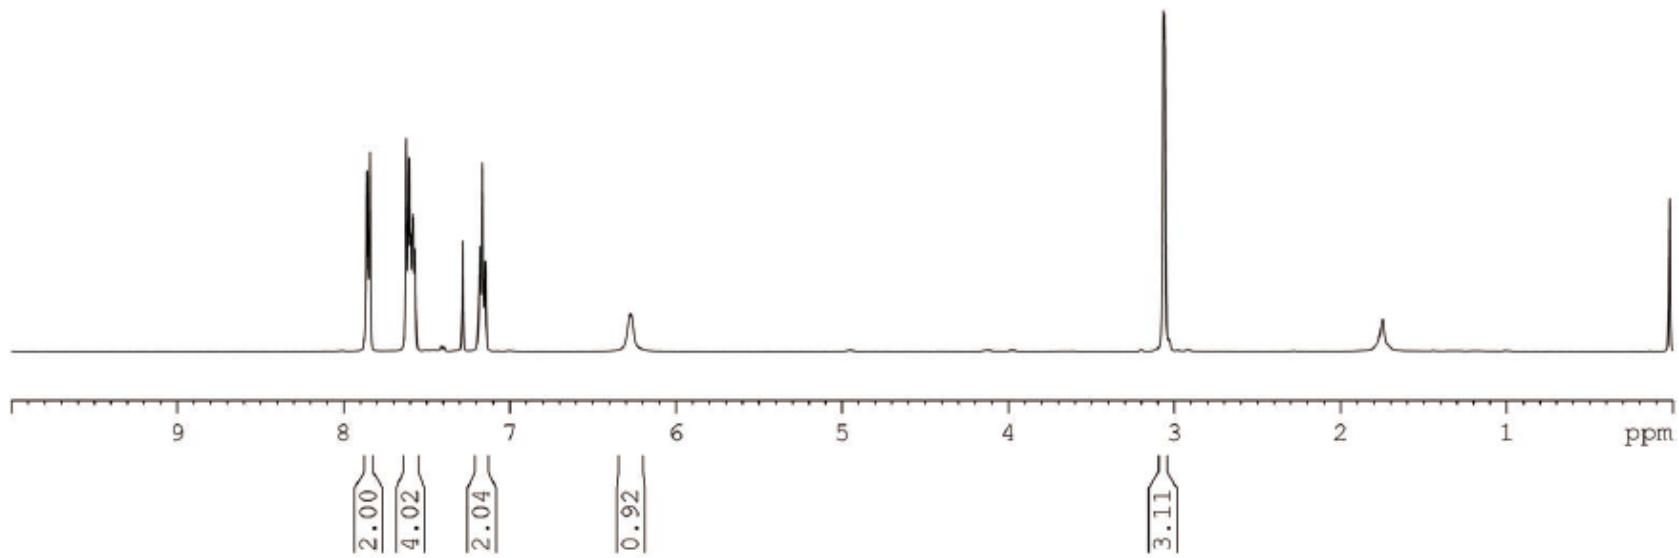

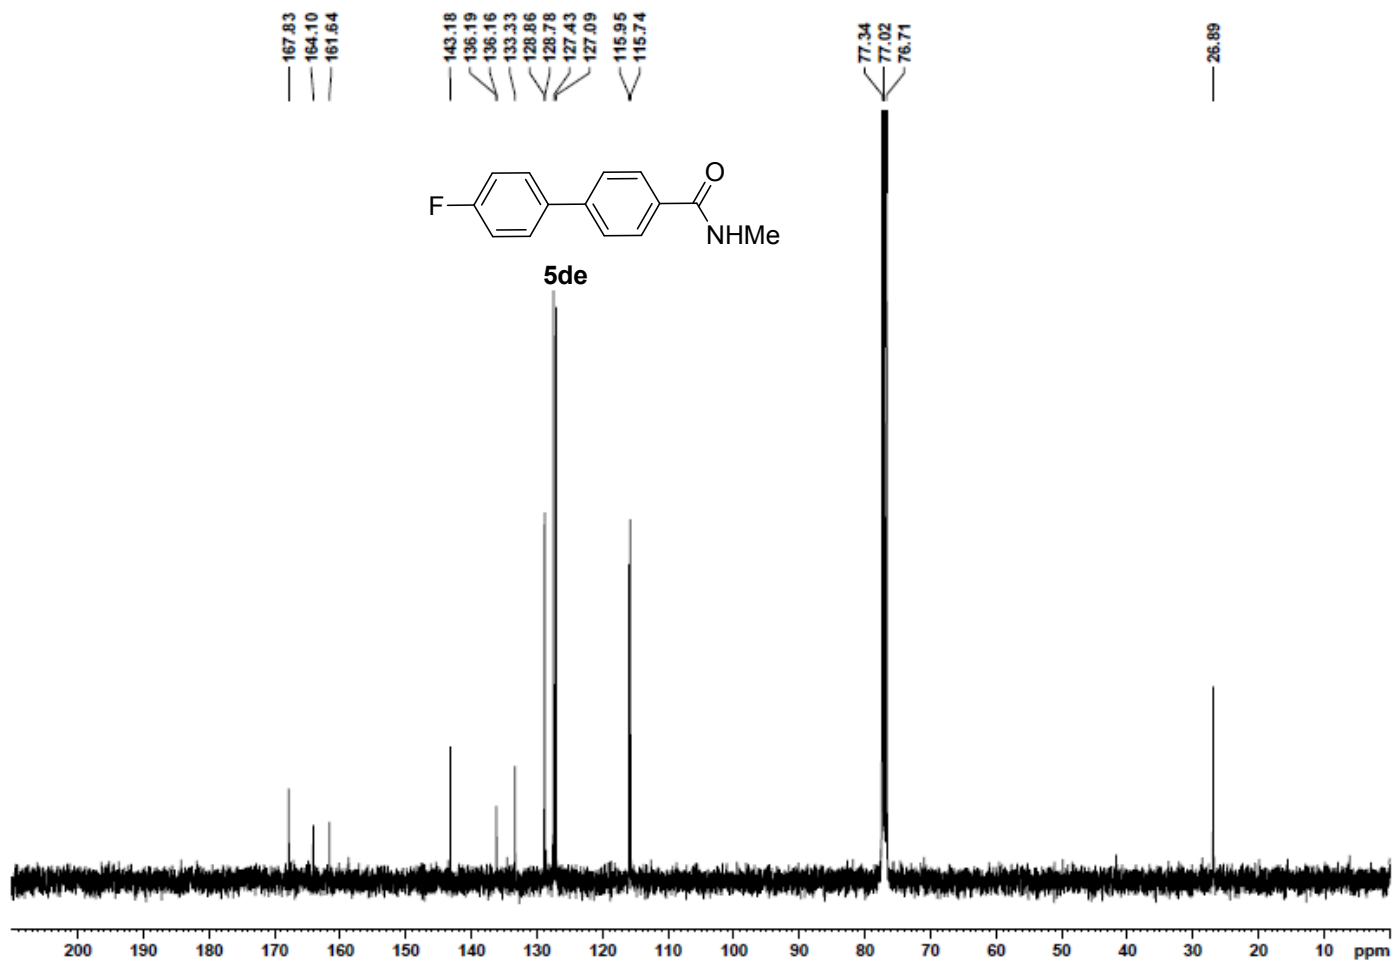

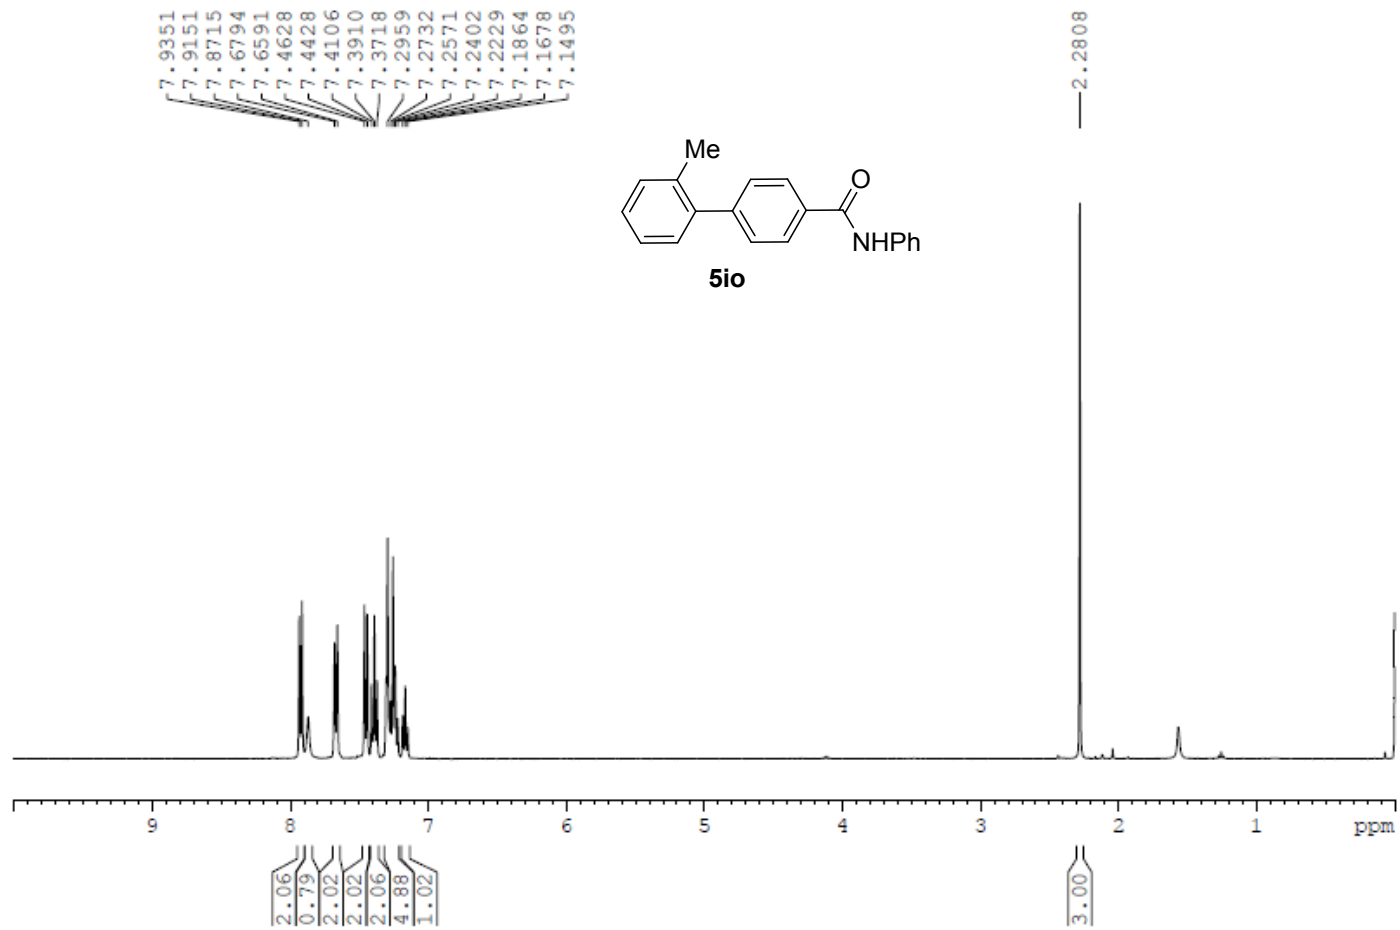

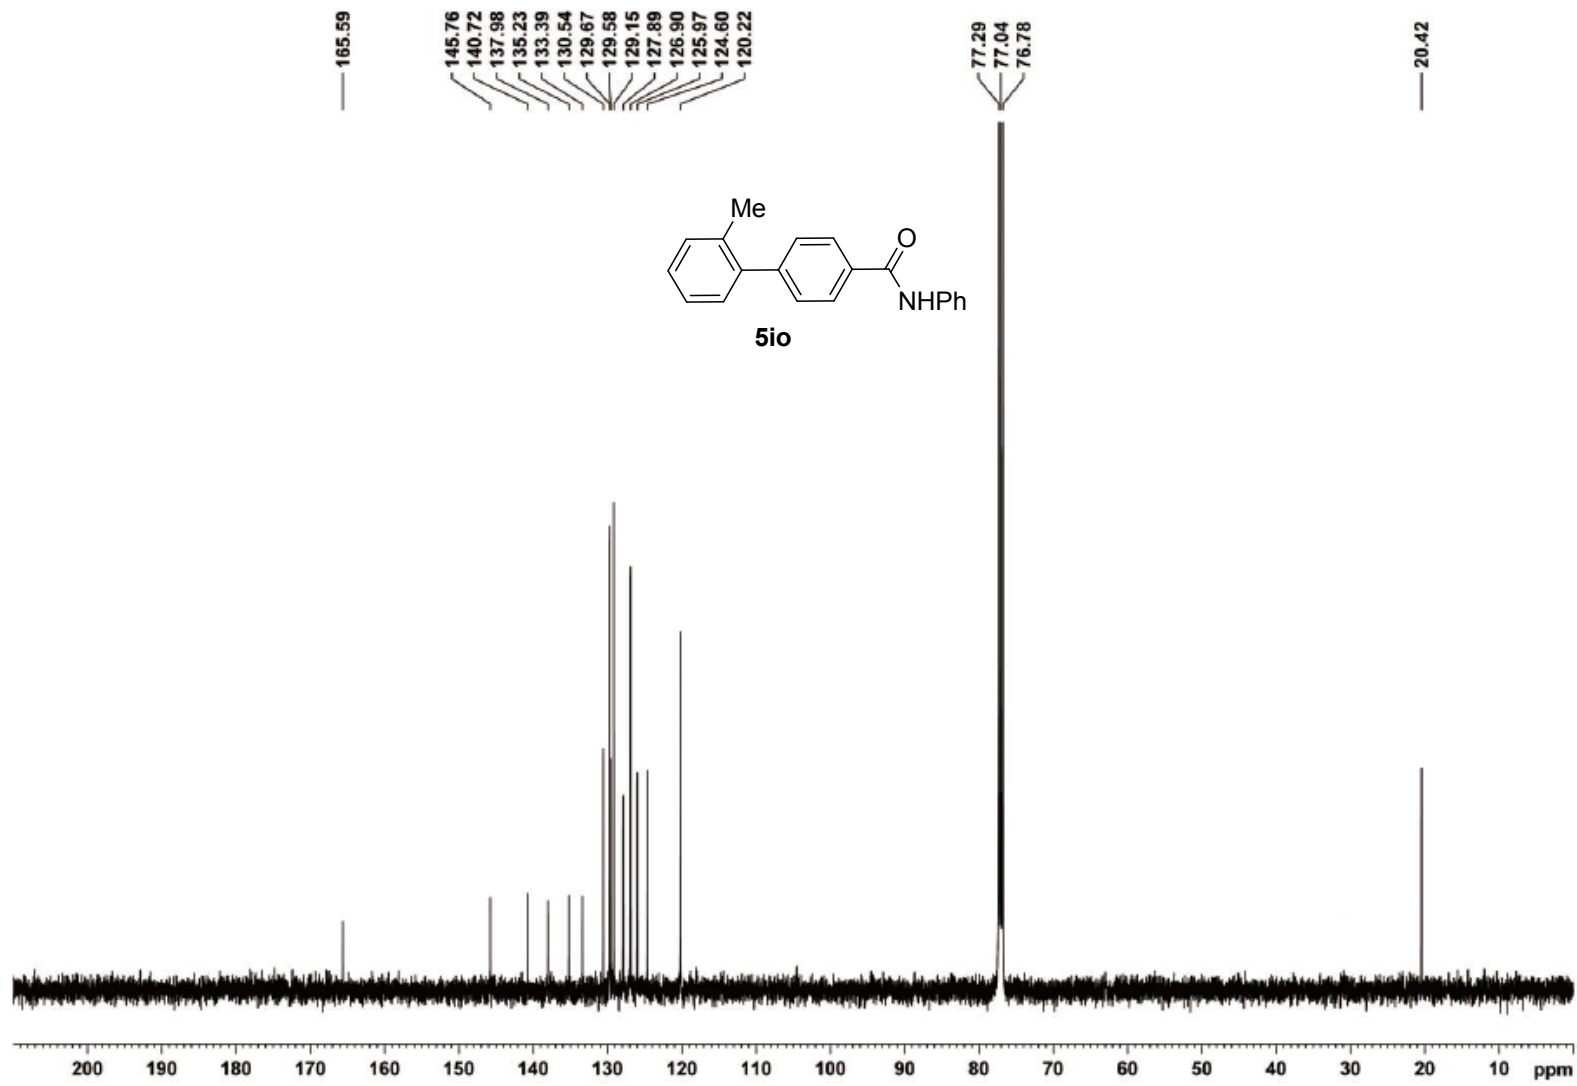

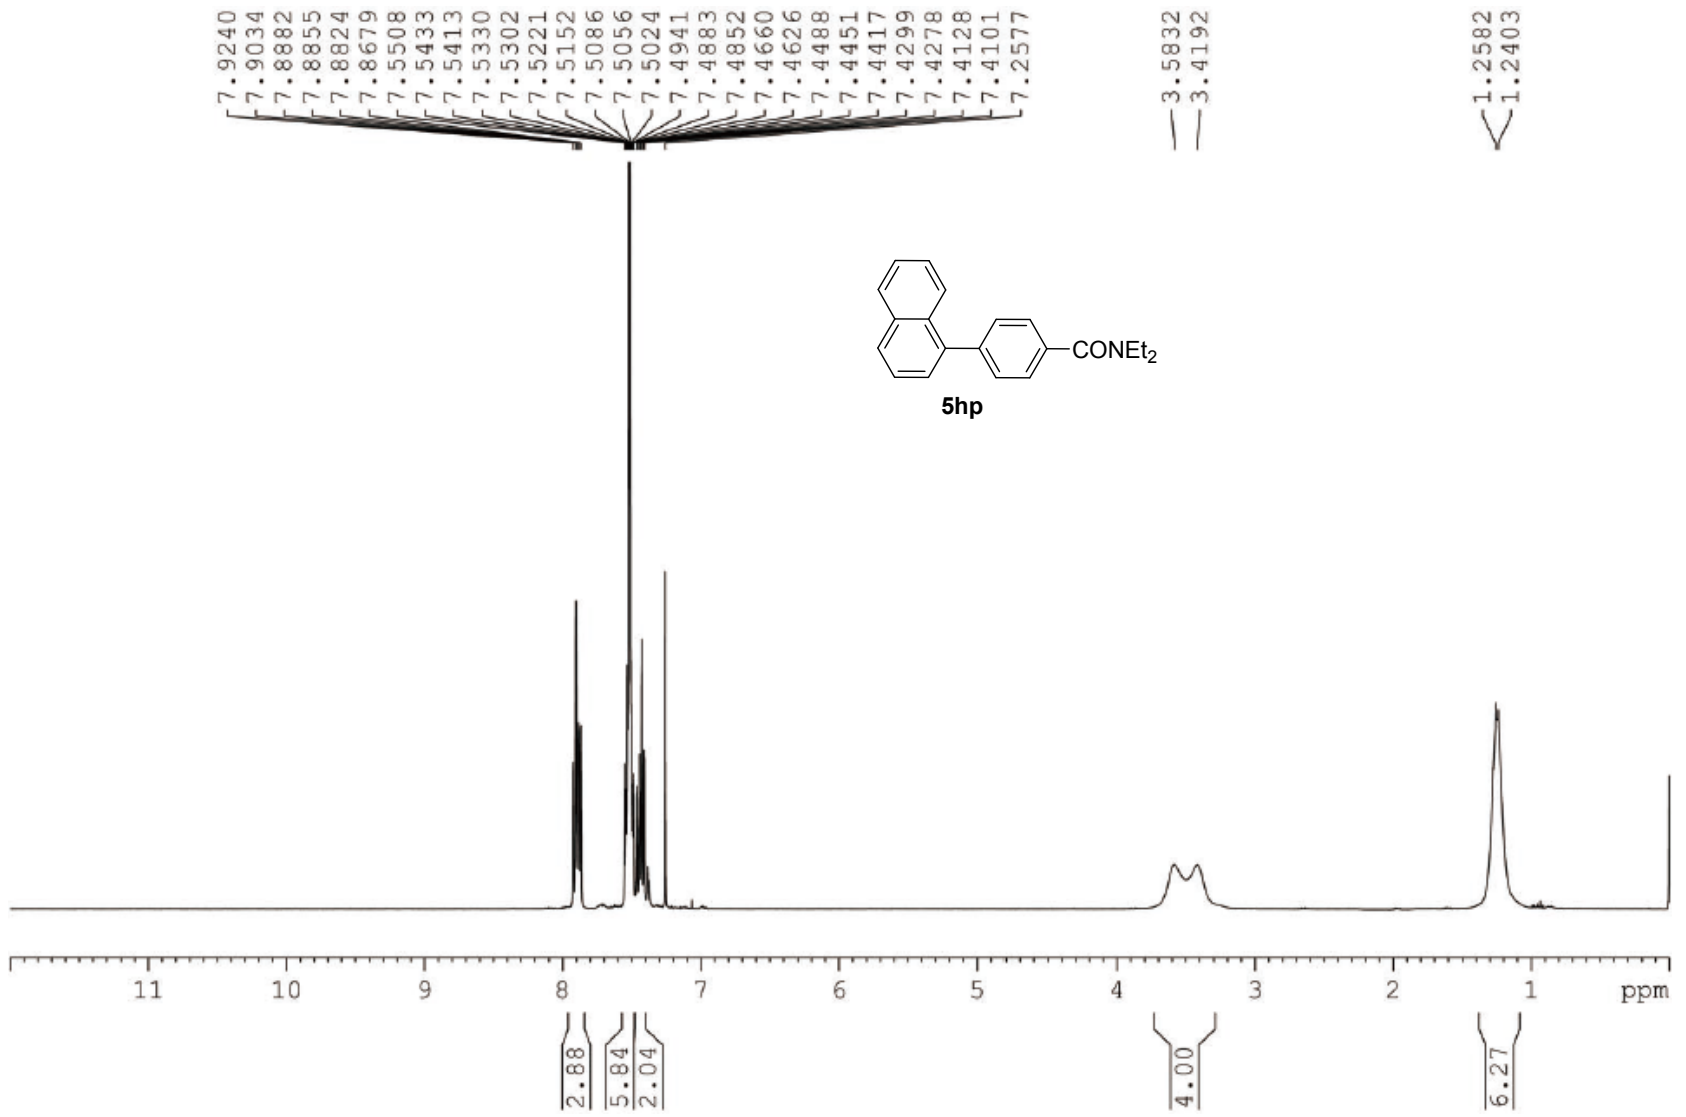

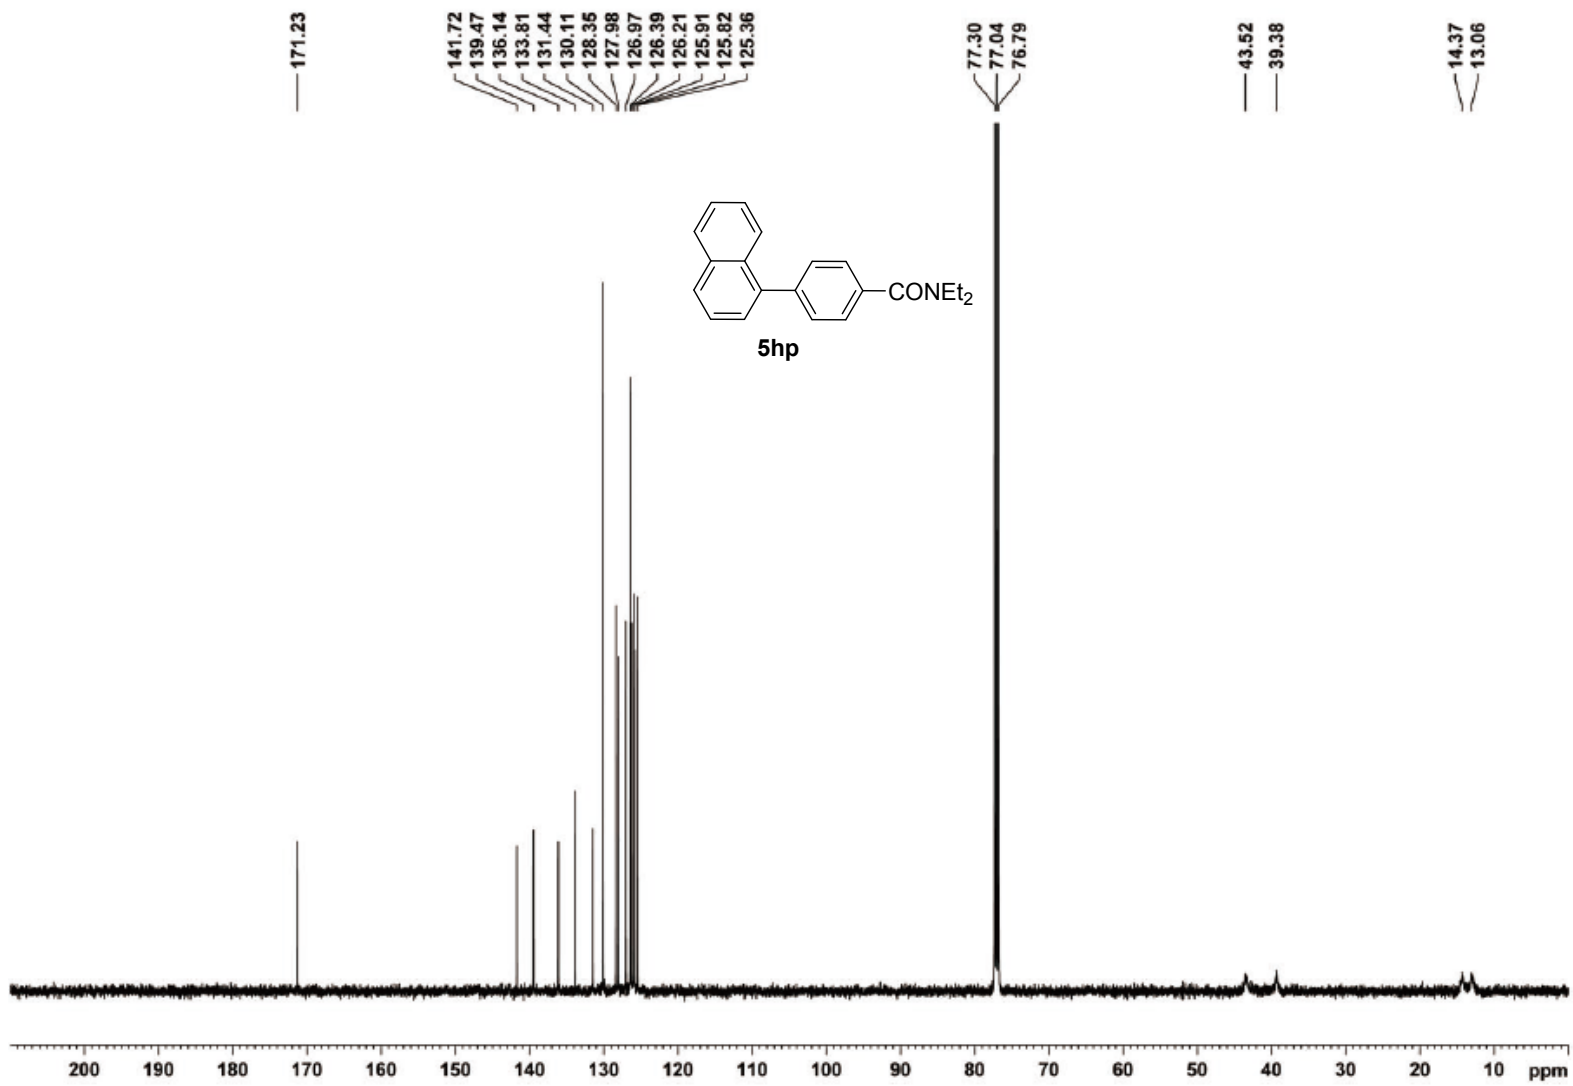



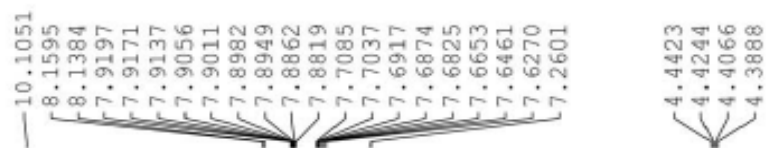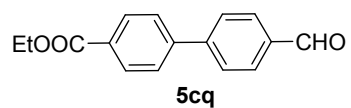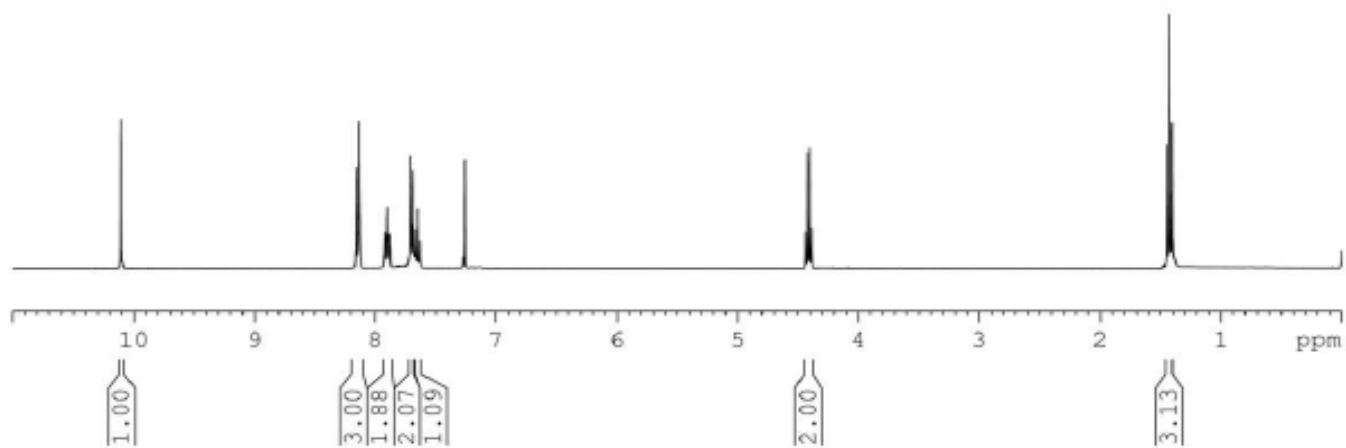

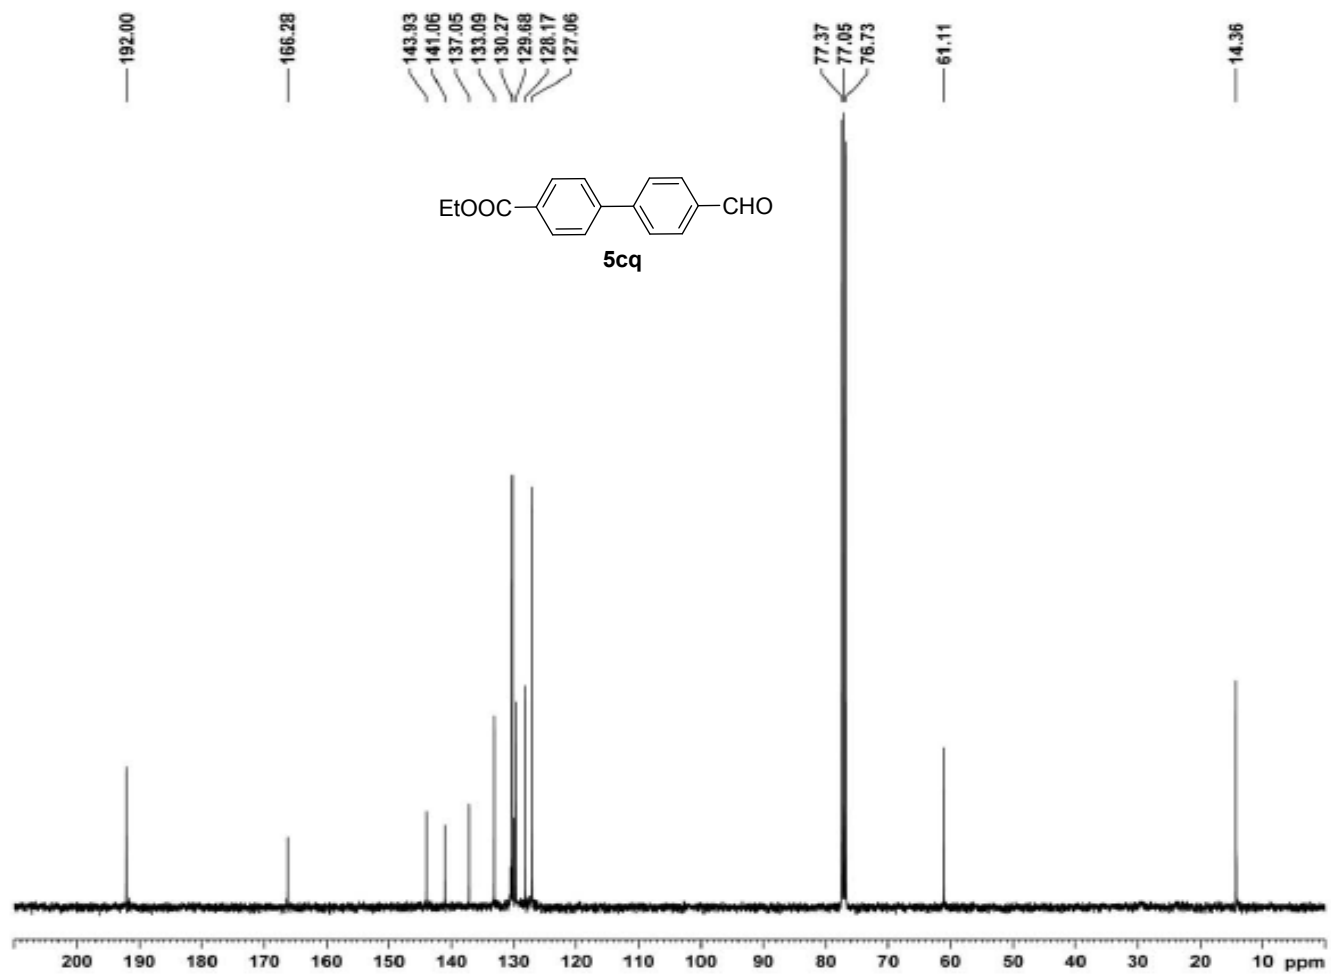

10.0268  
 7.9206  
 7.9040  
 7.8008  
 7.7844  
 7.4953  
 7.4936  
 7.4881  
 7.4864  
 7.4301  
 7.4287  
 7.4200  
 7.2843  
 7.1686  
 7.1611  
 7.1586  
 7.1511

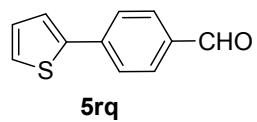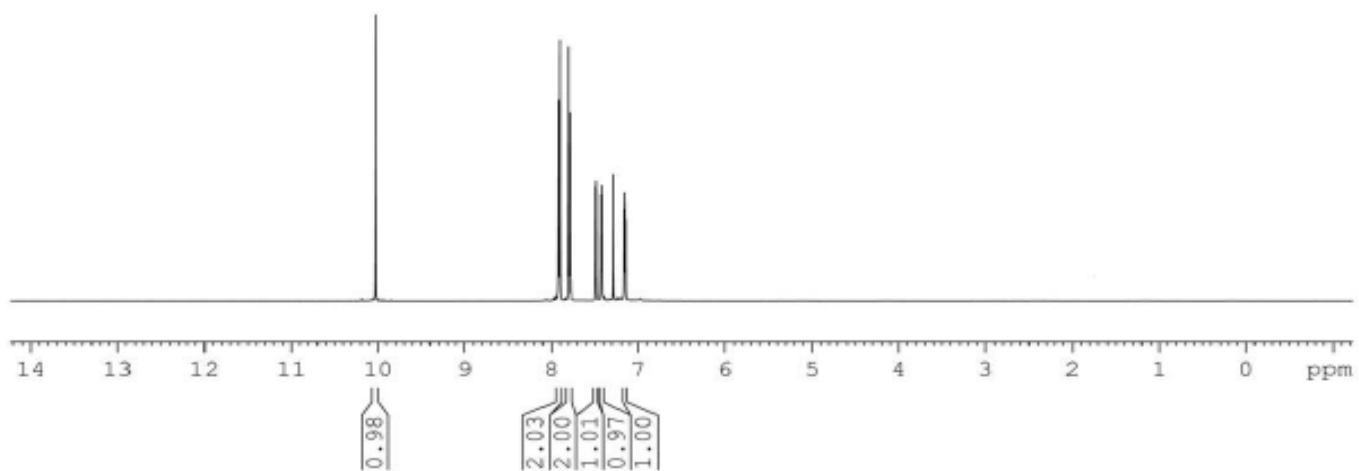

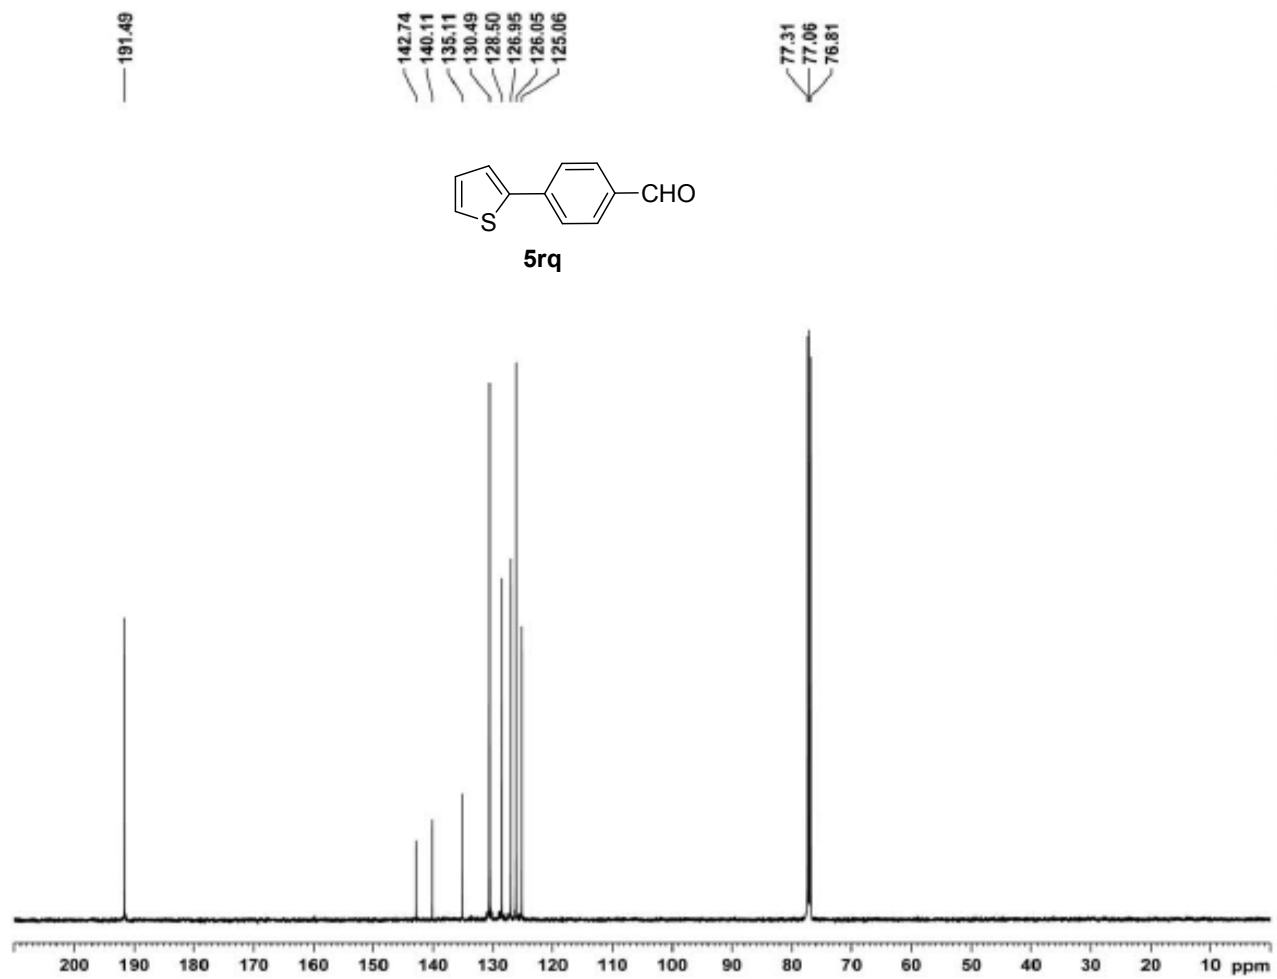

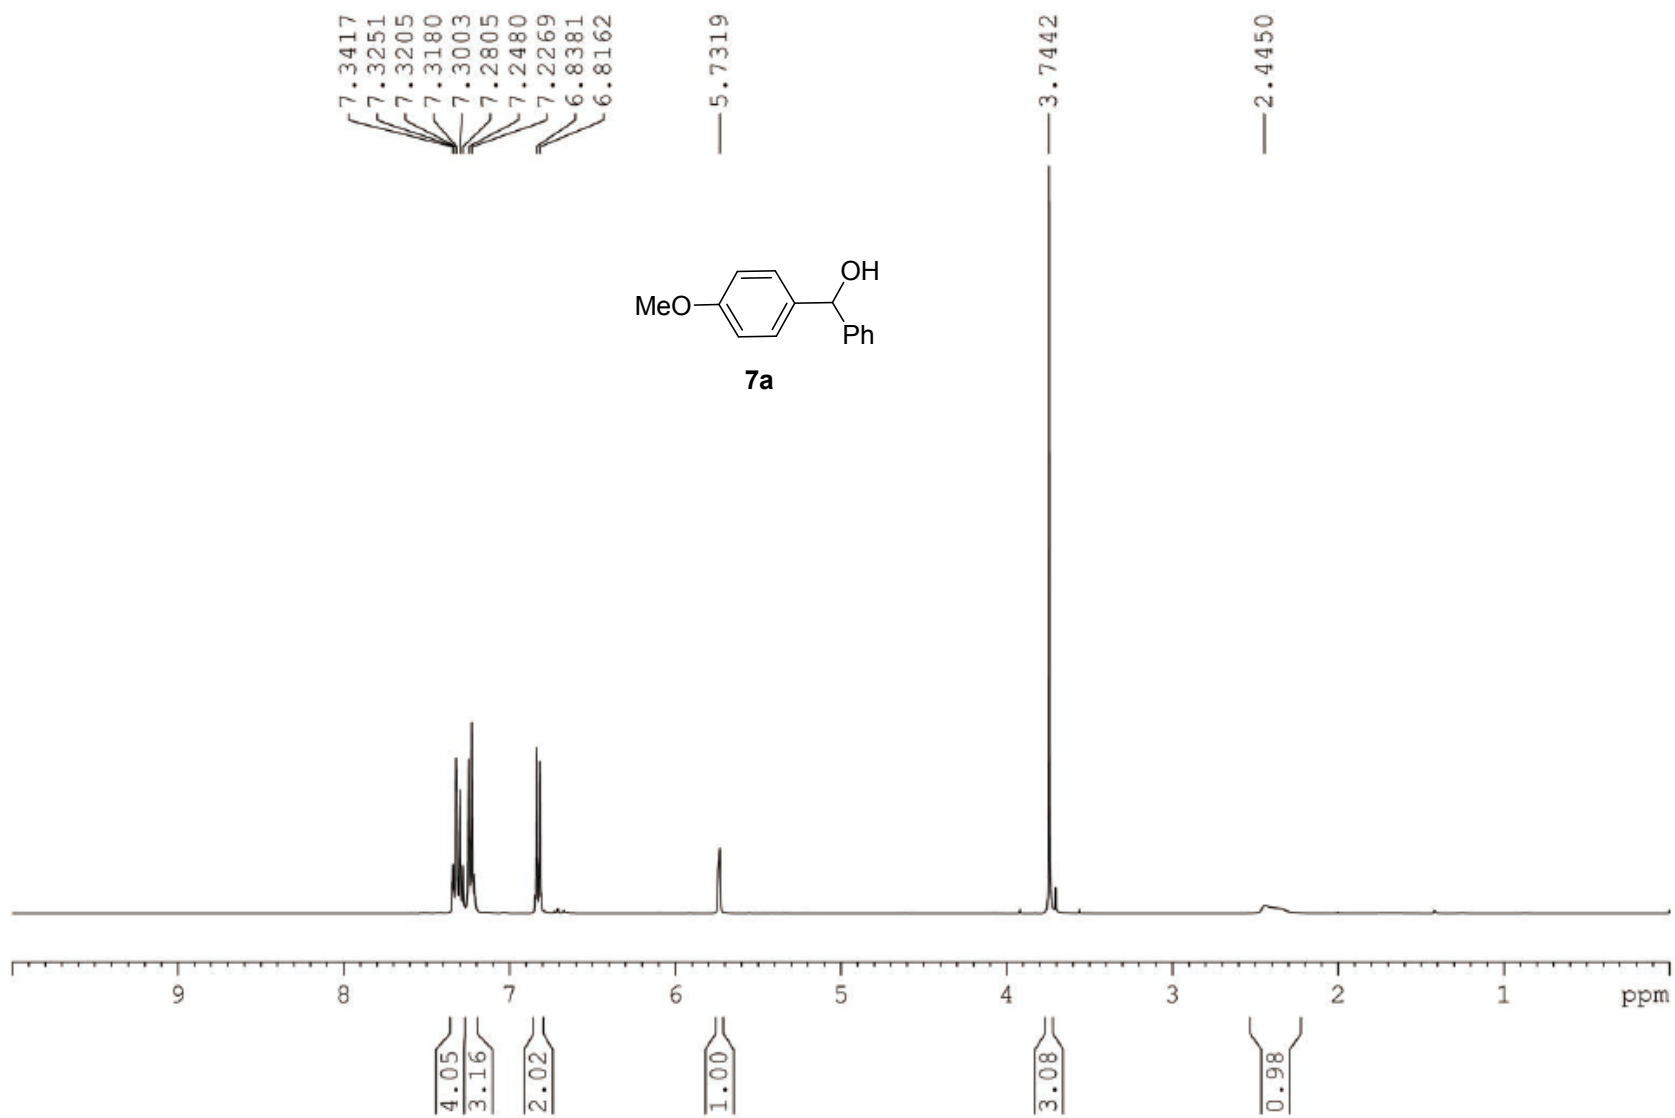

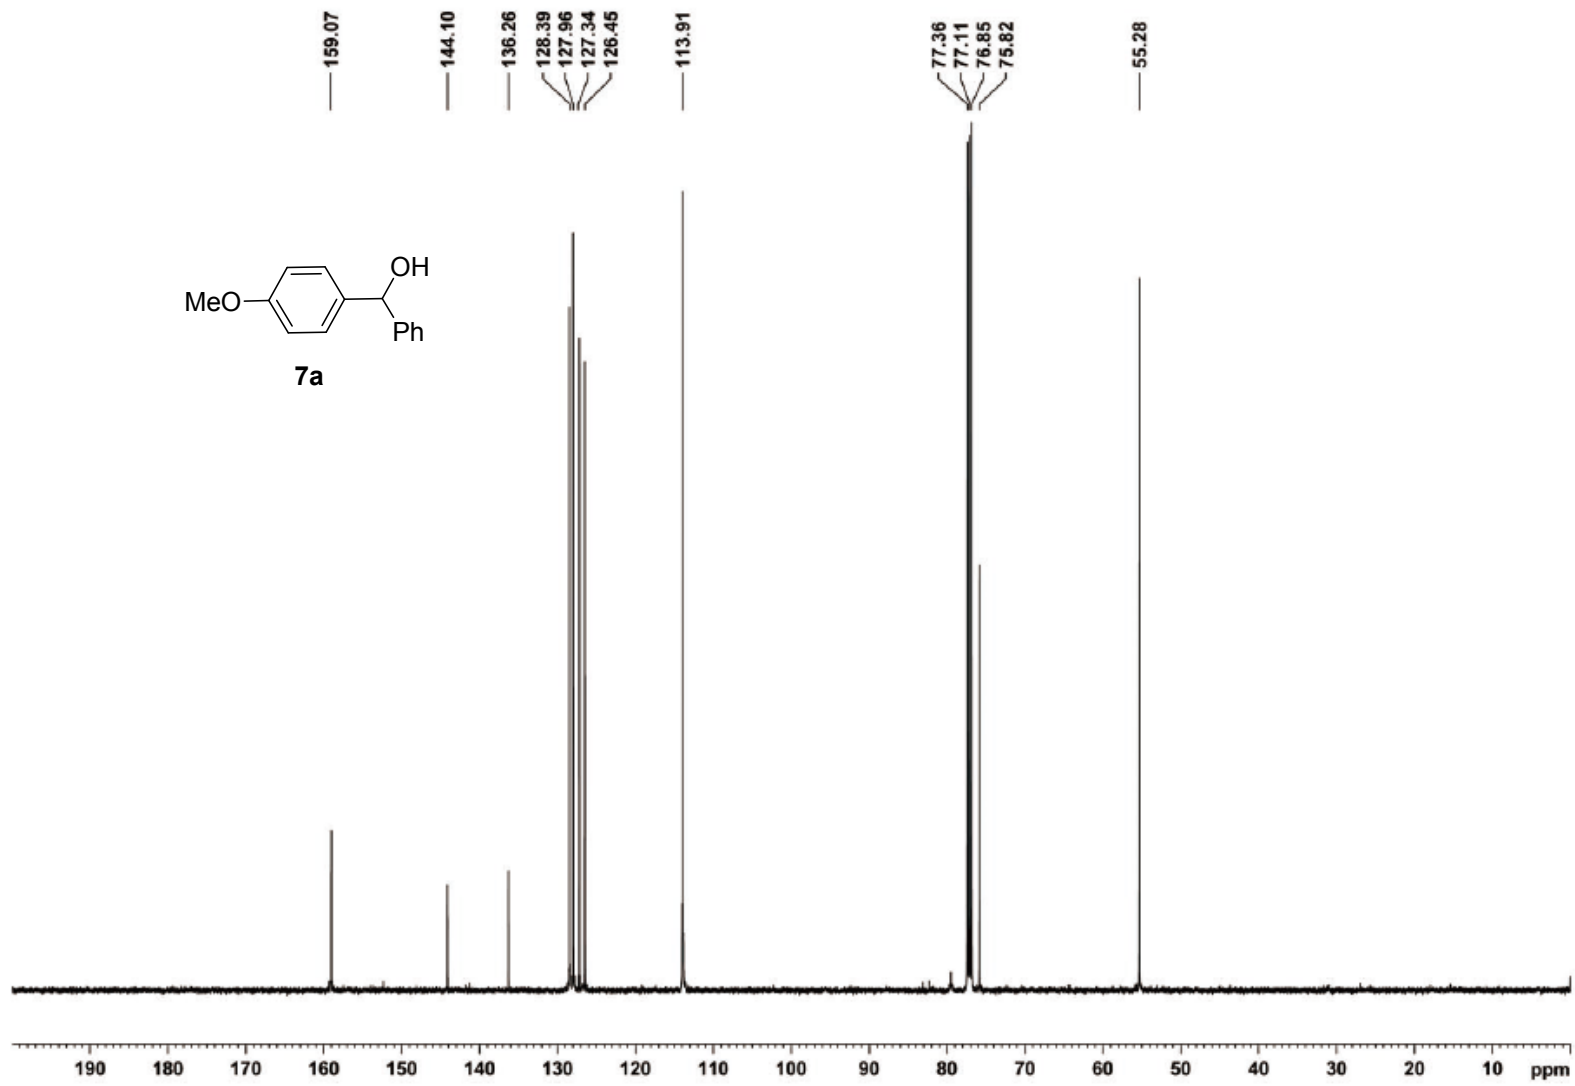

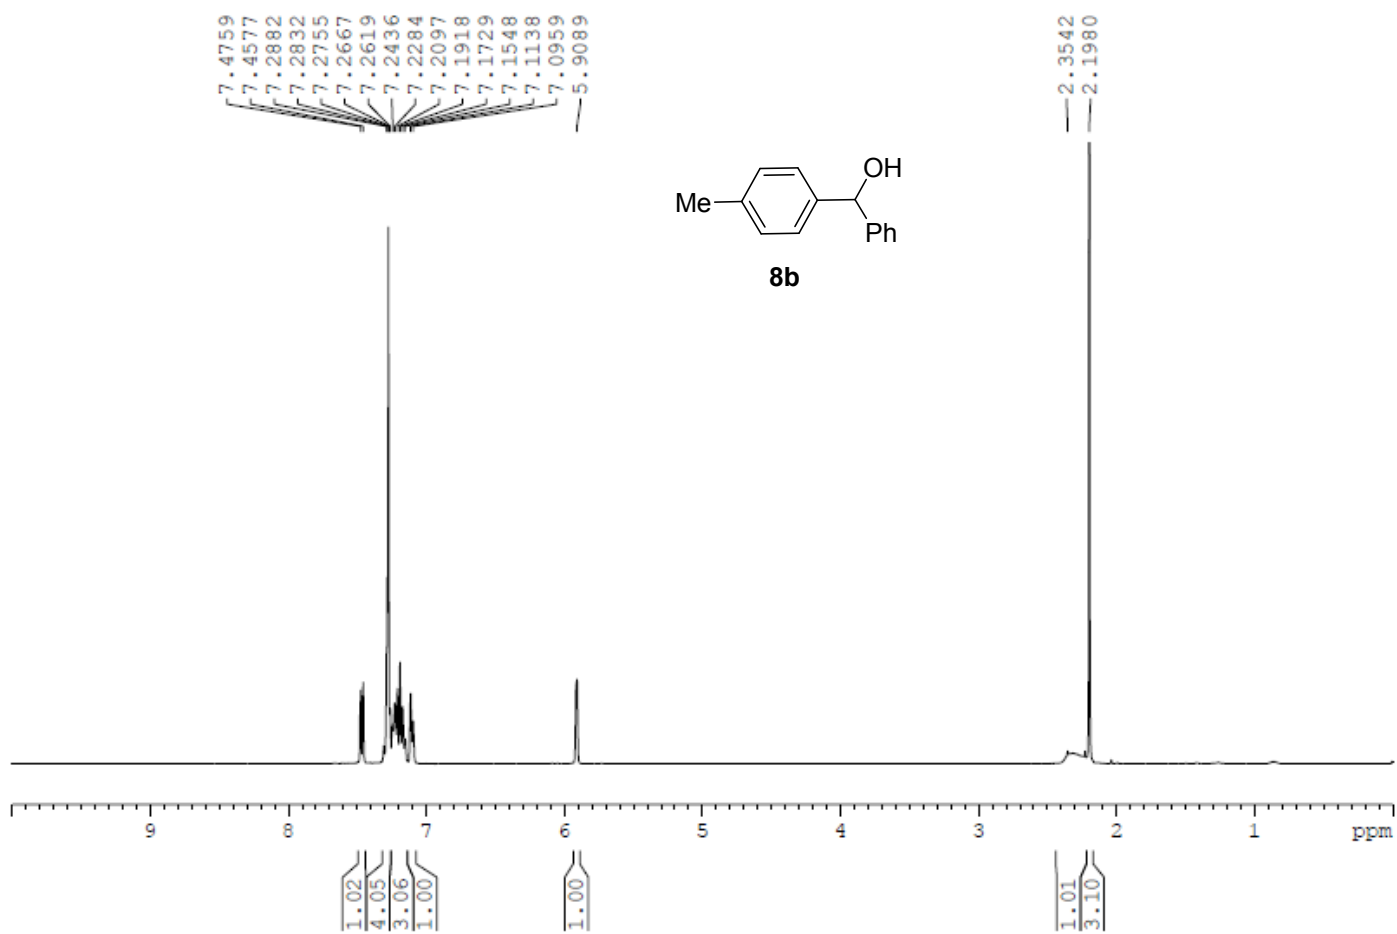

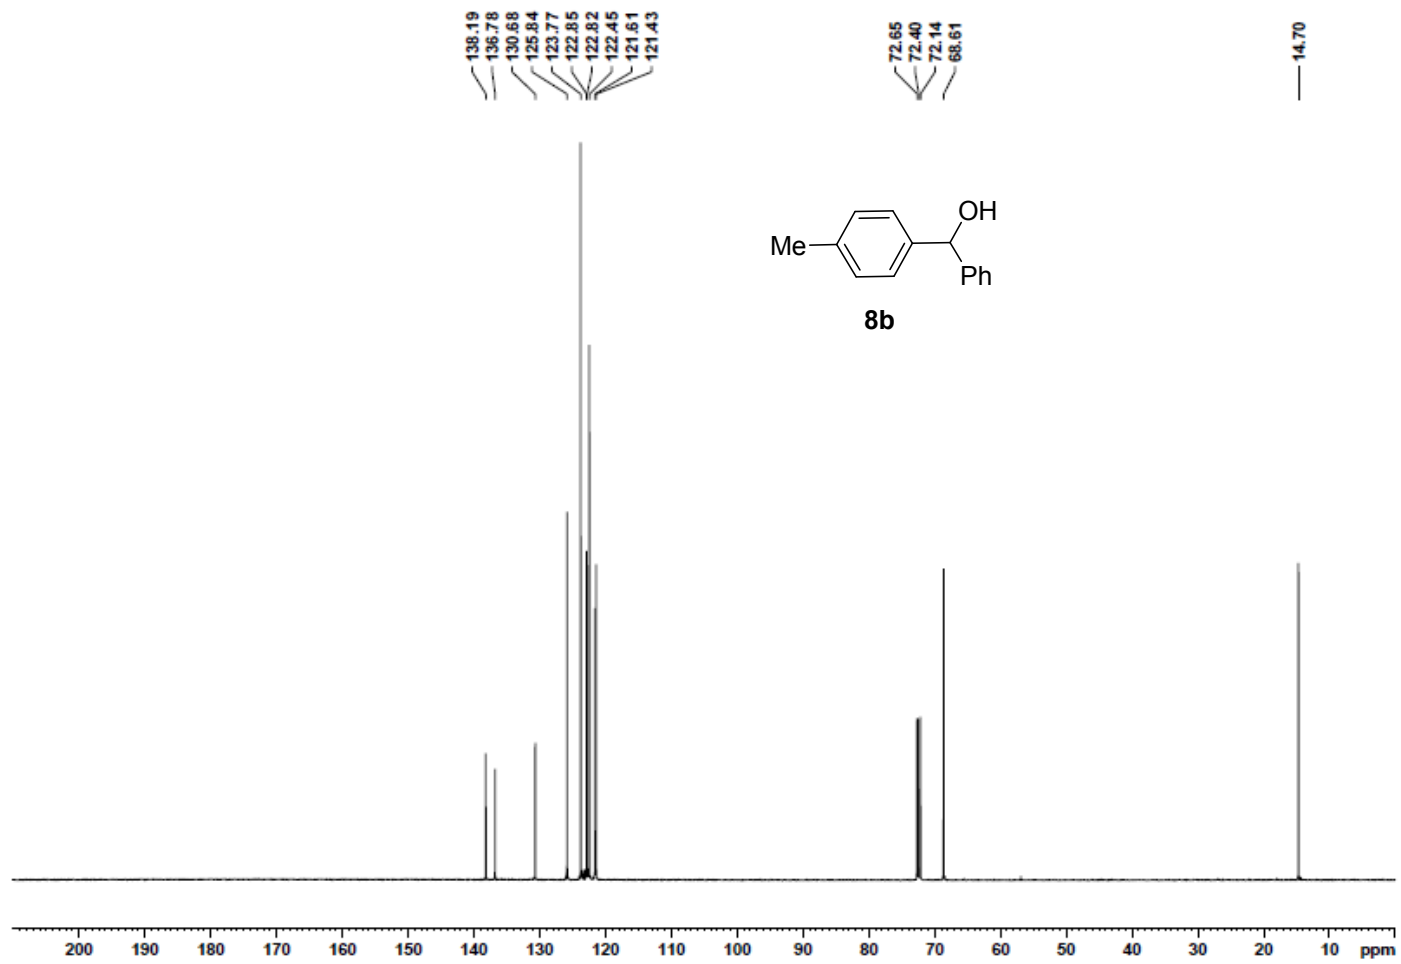



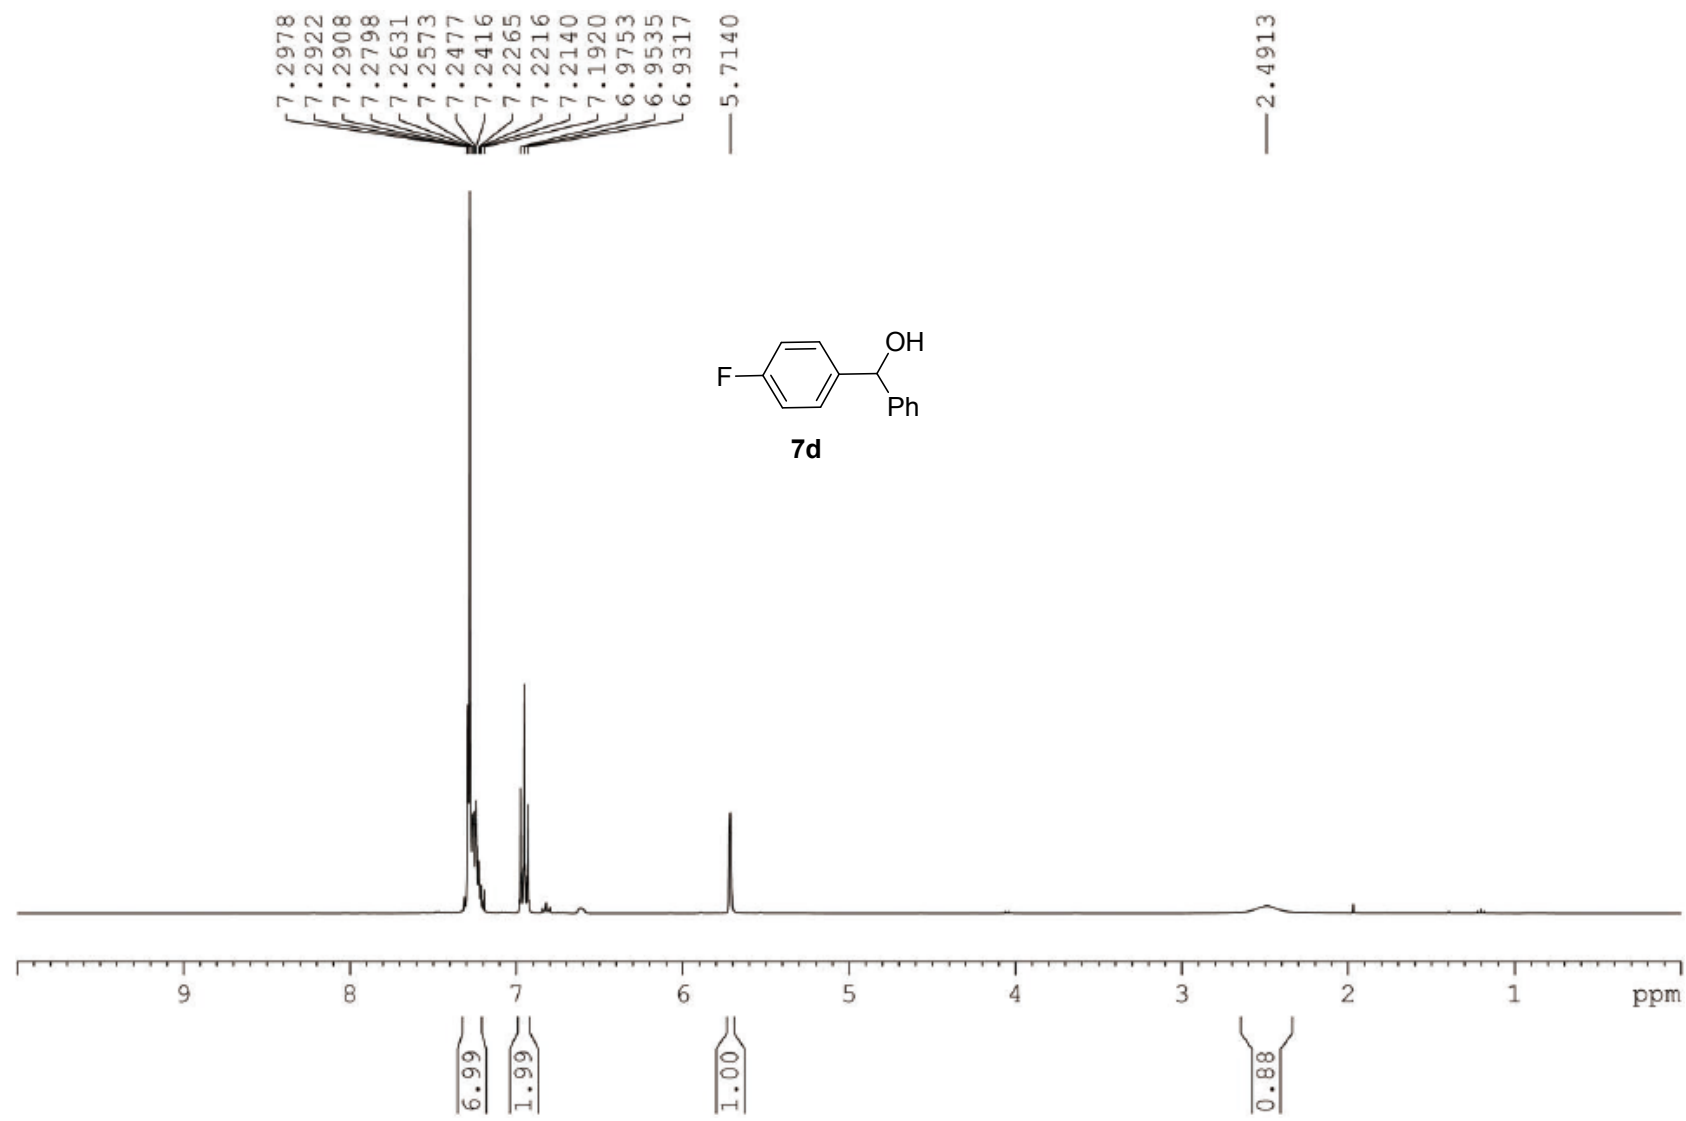

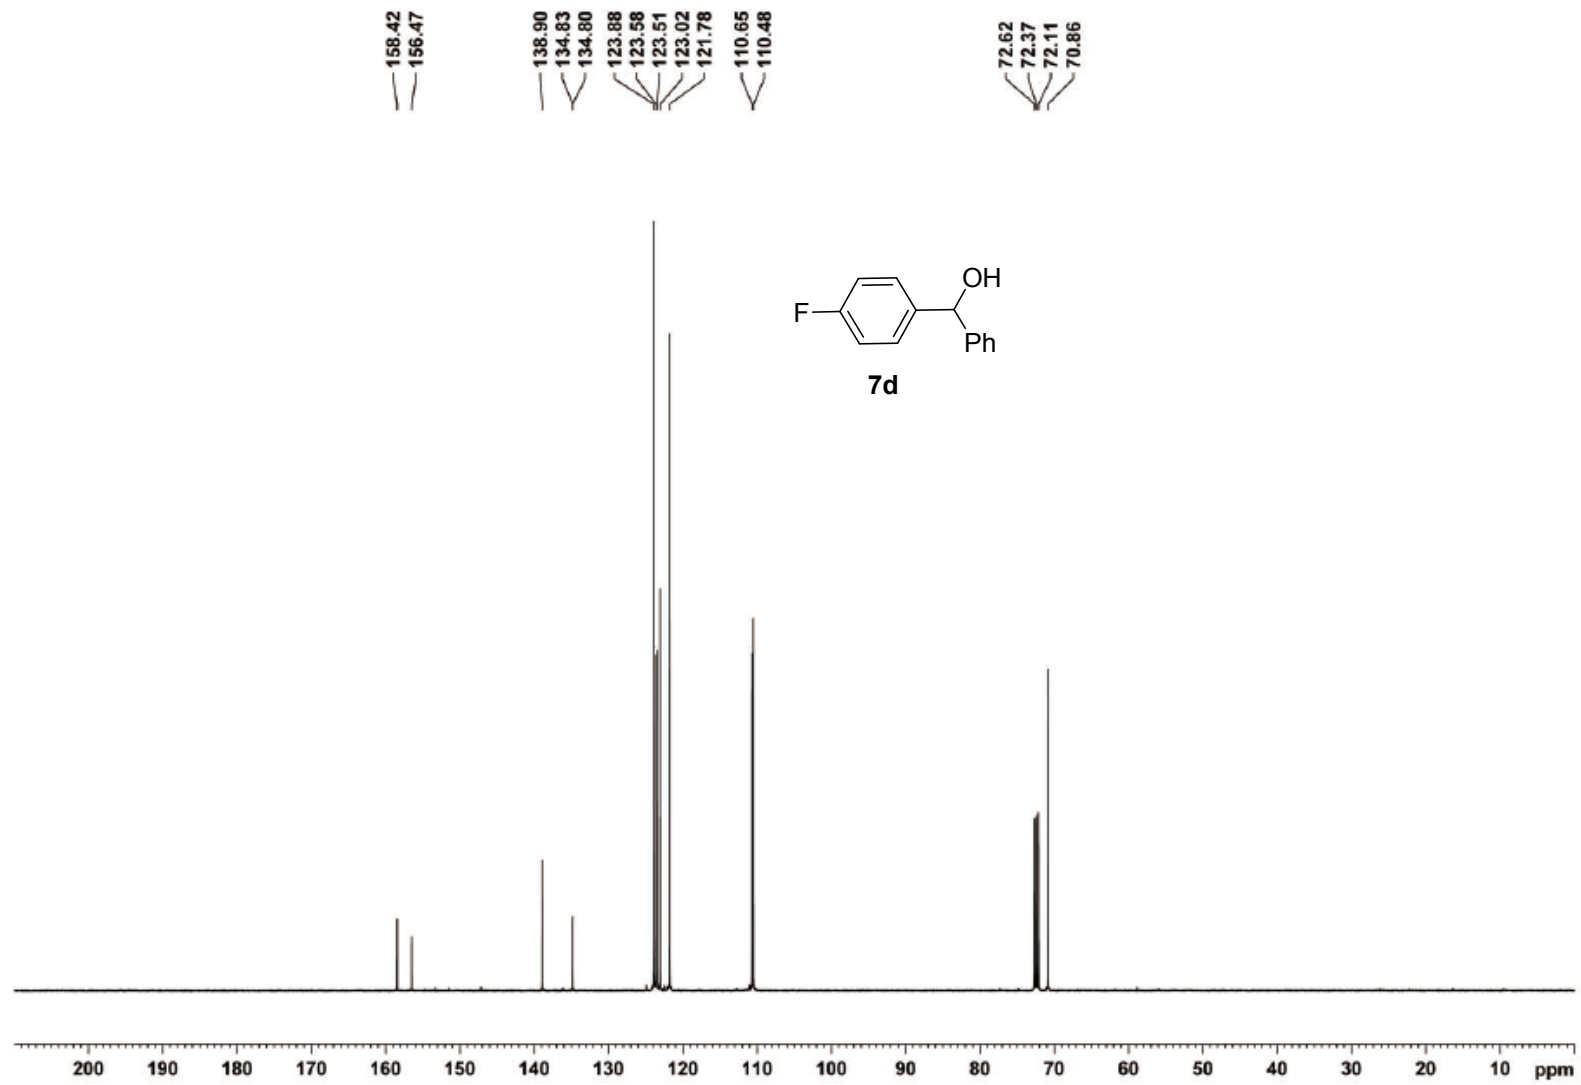

7.9941  
7.9732  
7.4542  
7.4338  
7.3509  
7.3400  
7.3340  
7.3268  
7.3201  
7.2847  
7.2779  
7.2631  
7.2505  
— 5.8505  
4.3672  
4.3495  
4.3316  
4.3139  
— 2.6869  
1.3831  
1.3653  
1.3475

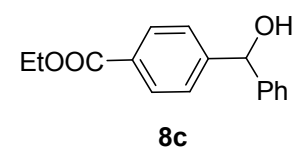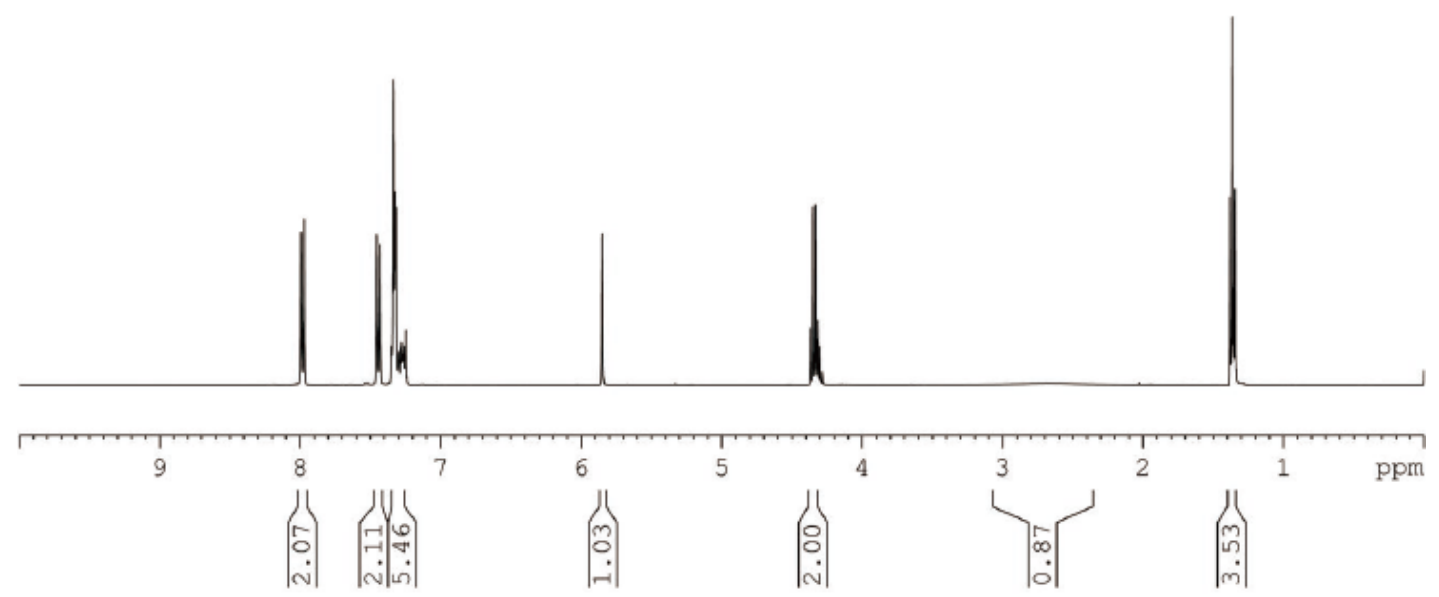

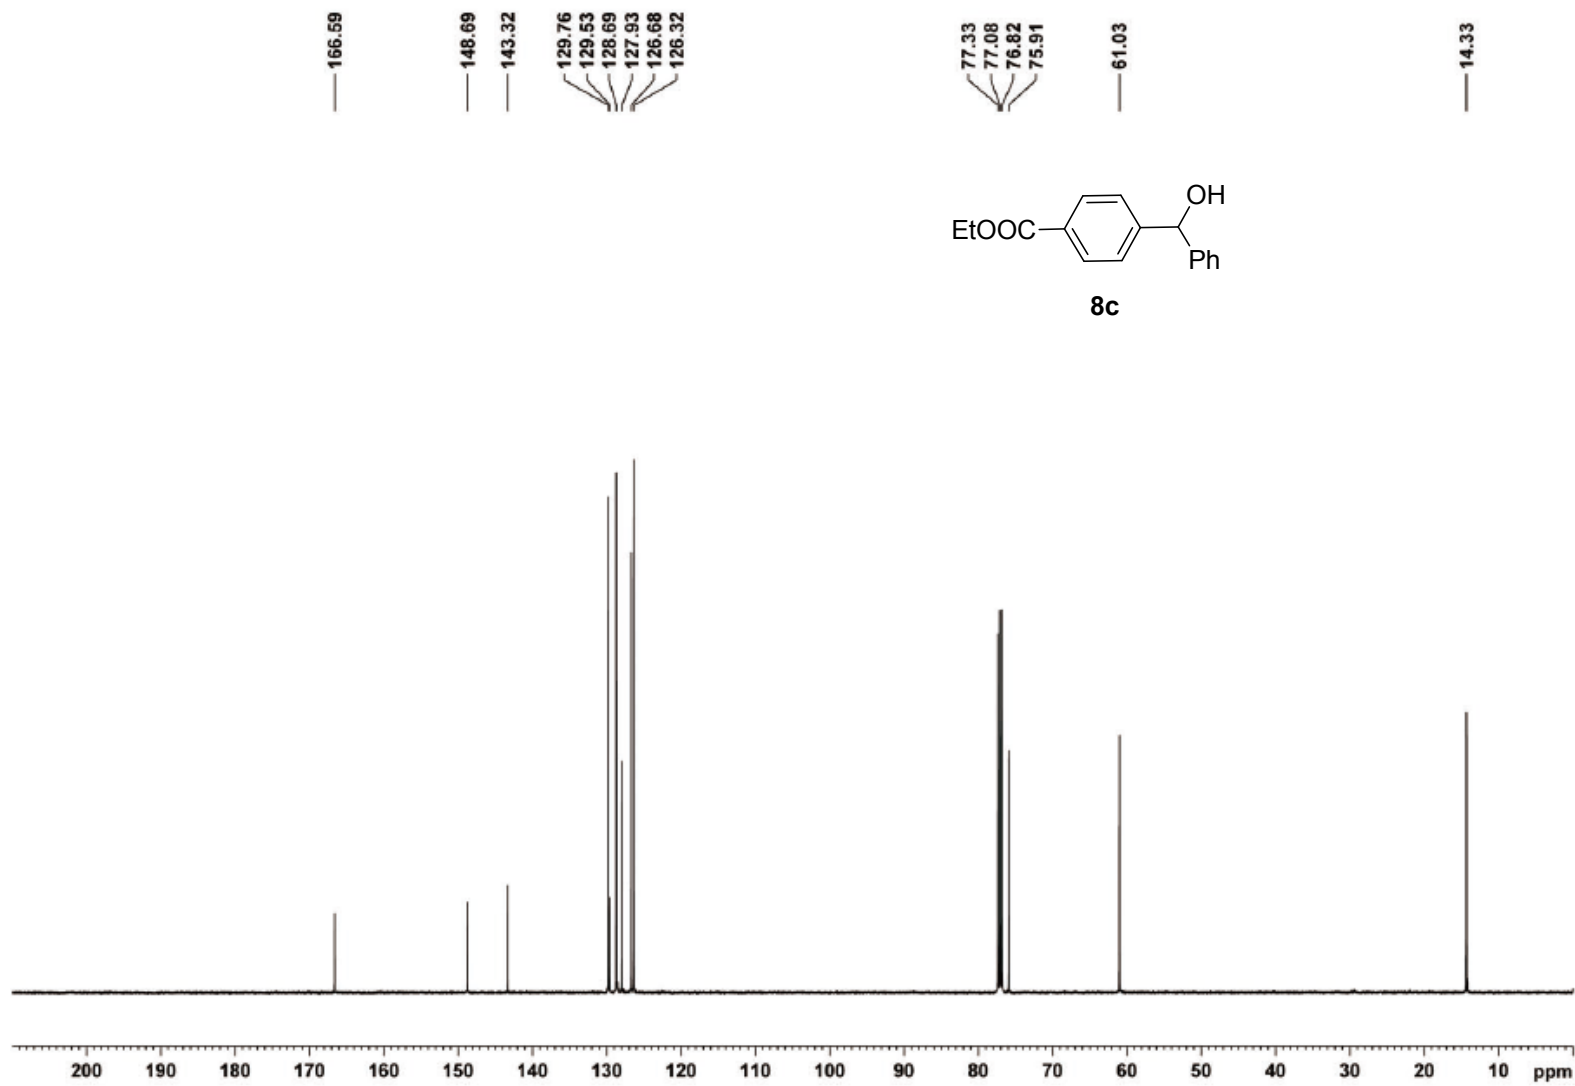

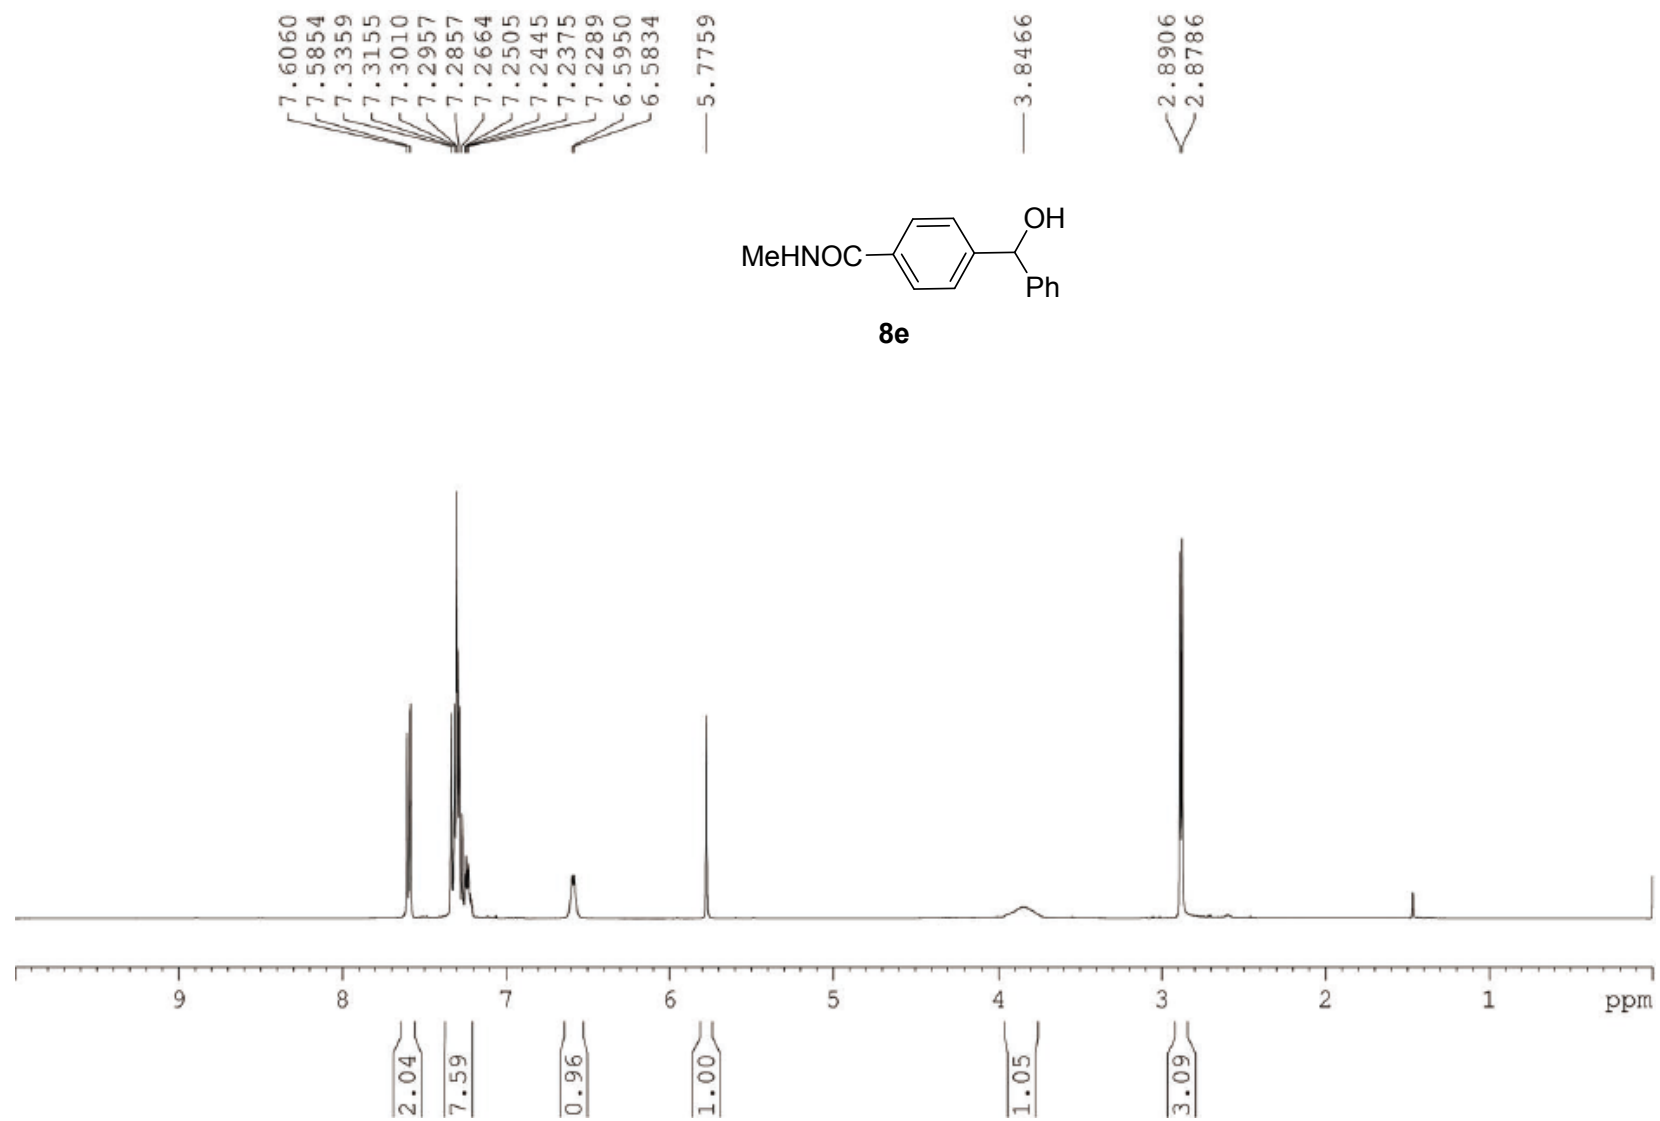

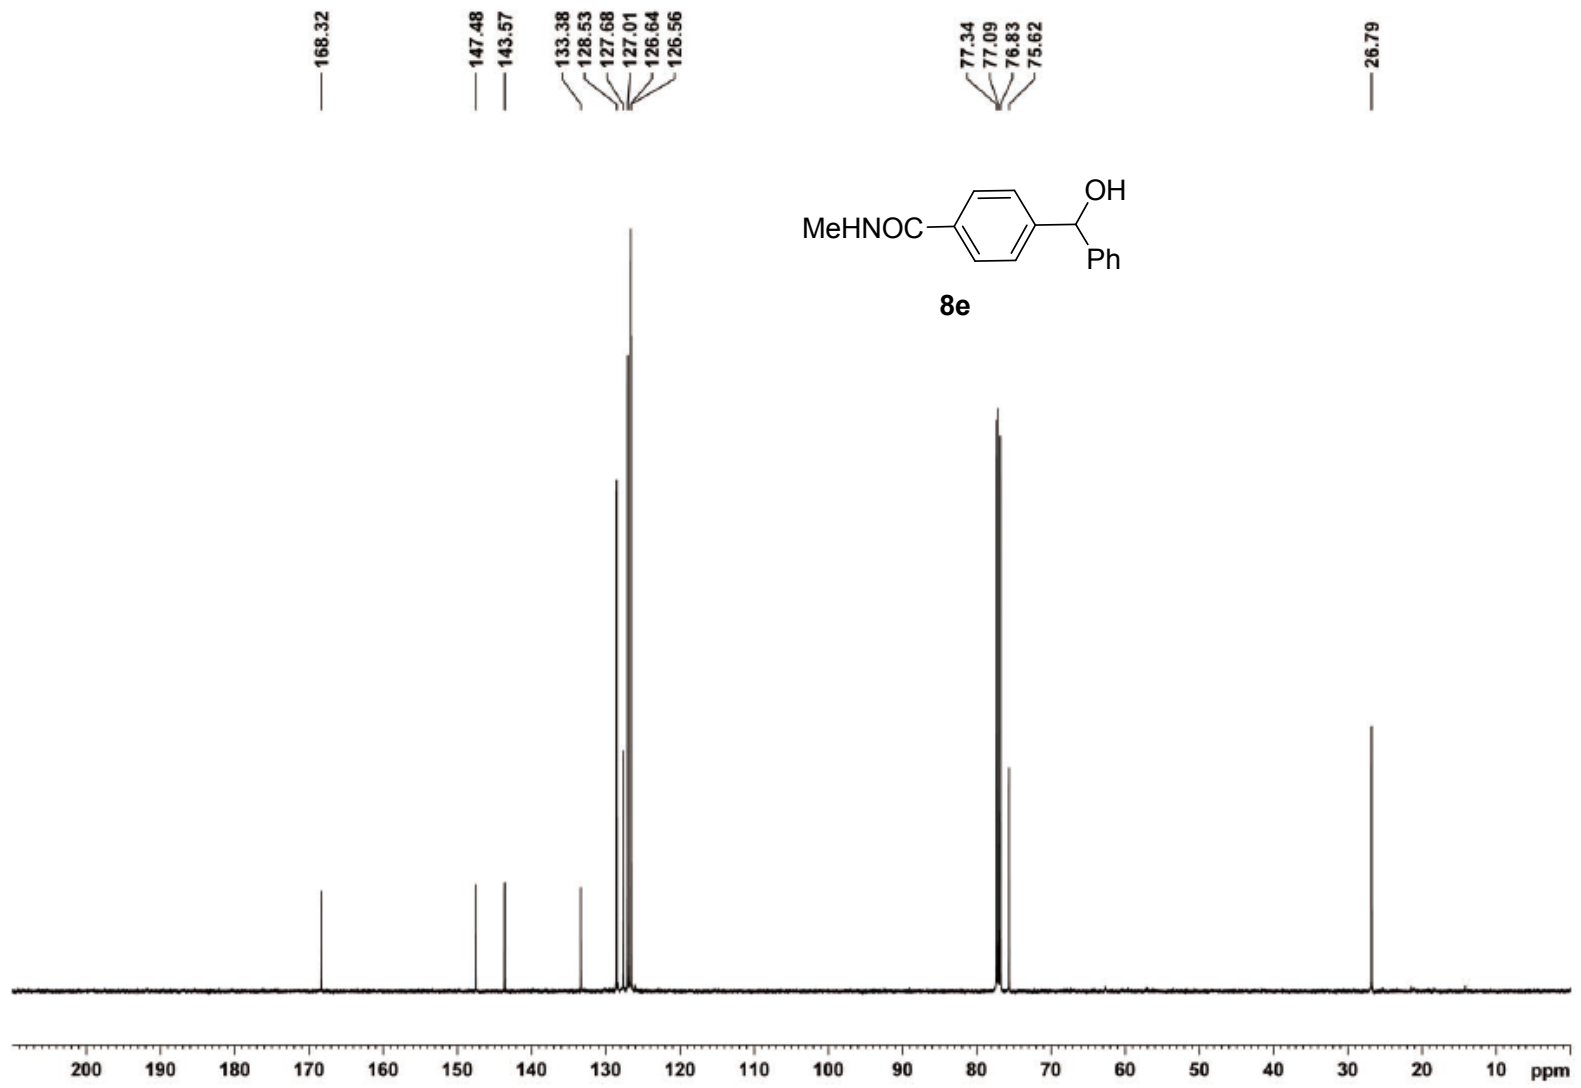

- 
- [10] Q. Yang, S. M. Ma, J. X. Li, F. S. Xiao, H. Xiong, *Chem. Commun.*, **2006**, 23, 2495.
- [11] S. E. Havlik, J. M. Simmons, V. J. Winton, J. B. Johnson, *J. Org. Chem.*, **2011**, 76(9), 3588.
- [12] S. P. G. Costa, R. M. F. Batista, M. M. Maria, *Eur. J. Org. Chem.*, **2006**, 17, 3938.
- [13] H. Li, Y. Xu, E. Shi, W. Wei, X-Q. Suo, X-B. Wan, *Chem. Commun.*, **2011**, 47(27), 7880.
- [14] M. Kuriyama, N. Ishiyama, R. Shimazawa, O. Onomura, *Tetrahedron.*, **2010**, 66, 6814.
- [15] V. J. Shin, T. Yamamoto, T. Ohta, Y. Itoer, C. J. Verbanic, *J. Am. Chem. Soc.*, **1957**, 79, 369.
